# Supplementary material for: Inhibition of transcription and antiproliferative effects in a cancer cell line using antigene oligonucleotides containing artificial nucleoside analogues
Source: Royal Society of Chemistry journal article supplement (doi:10.1039/d3md00139c), 2023-01-01
Supplement: d3md00139c1.pdf [file d3md00139c1.pdf]

Electronic Supplementary Information (ESI)

## **Inhibition of transcription and antiproliferative effects in a cancer cell line using antigene oligonucleotides containing artificial nucleoside analogues**

Lei Wang,<sup>a, c</sup> Ryotaro Notomi,<sup>a</sup> Shigeki Sasaki<sup>a, b</sup> and Yosuke Taniguchi<sup>\*a</sup>

<sup>a</sup> Graduate School of Pharmaceutical Sciences, Kyushu University, 3-1-1 Maidashi, Higashi-ku, Fukuoka 812-8582, Japan.

<sup>b</sup> Graduate School of Pharmaceutical Sciences, Nagasaki International University, 2825-7 Huis Ten Bosch Machi, Sasebo City, Nagasaki 859-3298, Japan.

<sup>c</sup> School of Pharmacy and Jiangsu Province Key Laboratory for Inflammation and Molecular Drug Target, Nantong University, Nantong 226001, PR China.

\* To whom correspondence should be addressed. Tel: +81 92 642 6569; Fax: +81 92 642 6876; Email: taniguch@phar.kyushu-u.ac.jp

Contents:

|                                                                                                                  |     |
|------------------------------------------------------------------------------------------------------------------|-----|
| Table S1. Oligonucleotides sequences used in this study                                                          | pS2 |
| Table S2. MALDI-TOF MS results of synthesized antigene TFOs                                                      | pS3 |
| Figure S1. HPLC charts of synthesized antigene TFOs                                                              | pS3 |
| Figure S2. TTS off-target frequency analysis from a database with mismatches set at the CG inversion site        | pS4 |
| Figure S3. The evaluation of competitive triplex-forming ability of TFOs against TUG1-TTSs and similar sequences | pS5 |
| Figure S4. The evaluation of competitive triplex-forming ability of TFOs                                         | pS6 |
| Table S3. Primer sequences for RT-qPCR.                                                                          | pS7 |
| Figure S5. Melting curve measurement, melting temperature ( $T_m$ ) determination of duplex DNA                  | pS8 |
| Table S4. Appendix data of values used in Figure 7                                                               | pS9 |

Table S1. Oligonucleotides sequences used in this study

| Name                                    | Sequence                                                                                                                         |
|-----------------------------------------|----------------------------------------------------------------------------------------------------------------------------------|
| TUG1-T                                  | 5' -AATGGGGAGAAGGAGAAGG-PA-3'                                                                                                    |
| TUG1-3Me (Z = <sup>3</sup> MeAP-ΨdC)    | 5' -AAZGGGGAGAAGGAGAAGG-PA-3'                                                                                                    |
| TUG1-TTS                                | 5' -FAM-ACATT <b>G</b> CCCCTCTTCCTCTTCCAA-3'<br>3' -TGTAAC <b>C</b> GGGGAGAAGGAGAAGGTT-5'                                        |
| VEGFA_1-T (Z =T)                        | 5' -AAAGGAGAAZGGAGGAGAGG-PA-3'                                                                                                   |
| VEGFA_1-3Me (Z = <sup>3</sup> MeAP-ΨdC) | 5' -AAAGGAGAAZGGAGGAGAGG-PA-3'                                                                                                   |
| VEGFA_1-TTS                             | 5' -FAM-GCTTTCTCTT <b>G</b> CCTCCTCTCCAA-3'<br>3' -CGAAAGGAGAA <b>C</b> GGAGGAGAGGTT-5'                                          |
| VEGFA_2-T                               | 5' -GGGGTGGGGTTGGGTGGGG-PA-3'                                                                                                    |
| VEGFA_2-3Me (Z = <sup>3</sup> MeAP-ΨdC) | 5' -GGGGZGGGGZGGGGZGGGG-PA-3'                                                                                                    |
| VEGFA_2-TTS                             | 5' -FAM-GGGACCC <b>C</b> CCCC <b>G</b> CCCC <b>G</b> CCCCGGGG-3'<br>3' -CCCTGGGG <b>C</b> GGGG <b>C</b> GGG <b>C</b> GGGGCCCC-5' |
| HMGA1-T                                 | 5' -AGGATAGGTGGGAGAGAGAG-PA-3'                                                                                                   |
| HMGA1-3Me (Z = <sup>3</sup> MeAP-ΨdC)   | 5' -AGGAZAGGZGGGAGAGAGAG-PA-3'                                                                                                   |
| HMGA1-TTS                               | 5' -FAM-GGTCCT <b>G</b> TCC <b>G</b> CCCTCTCTCTCGG-3'<br>3' -CCAGGAC <b>A</b> GG <b>C</b> GGGAGAGAGAGCC-5'                       |
| c-MET-T                                 | 5' -AAGGAGGGTGGAGATGGGGTG-PA-3'                                                                                                  |
| c-MET-3Me (Z = <sup>3</sup> MeAP-ΨdC)   | 5' -AAGGAGGGZGGAGAZGGGGZG-PA-3'                                                                                                  |
| c-MET-TTS                               | 5' -FAM-TTCCTCC <b>C</b> GCTCT <b>G</b> CCCC <b>G</b> CCCCAC-3'<br>3' -AAGGAGGG <b>C</b> GGAG <b>A</b> CGGG <b>C</b> GGGTG-5'    |
| TUG1-TTS(A)                             | 5' -FAM-ACATT <b>T</b> CCCCTCTTCCTCTTCCAA-3'<br>3' -TGTA <b>A</b> AGGGGAGAAGGAGAAGGTT-5'                                         |
| TUG1-TTS(G)                             | 5' -FAM-ACATT <b>C</b> CCCCTCTTCCTCTTCCAA-3'<br>3' -TGTA <b>A</b> GGGGAGAAGGAGAAGGTT-5'                                          |
| VEGFA_1-TTS(G)                          | 5' -FAM-GCTTTCTCTT <b>C</b> CCTCCTCTCCAA-3'<br>3' -CGAAAGGAGAA <b>G</b> GGAGGAGAGGTT-5'                                          |
| TUG1-ASO                                | 5' -TGAATTTCAATCATTTGAGAT-3'                                                                                                     |
| TUG1-ASO-PS                             | 5' -T*G*A*A*T*T*T*C*A*A*T*C*A*T*T*T*G*A*G*A*T-3'                                                                                 |
| Rev-TUG1-T                              | 5' -GGAAGAGGAAGAGGGGTAA-3'                                                                                                       |
| Rev-TUG1-ASO-PS                         | 5' -T*A*G*A*G*T*T*T*A*C*T*A*A*C*T*T*T*A*A*G*T-3'                                                                                 |
| ODN(A)                                  | 5' -CCTTCTCCTTCTCCCCATT-3'                                                                                                       |
| Bst-ODN1                                | 5' -CCTTCTCCTTCTCCCCUTT-3'                                                                                                       |
| Bst-ODN2                                | 5' -CCTUCTCCTUCTCCCCUTT-3'                                                                                                       |
| Bst-ODN3                                | 5' -CCTUCUCCTUCCCCCUTT-3'                                                                                                        |

PA: aminopropyl group, \*: phosphorothioate linkage.

Table S2. MALDI-TOF MS results of synthesized antigene TFOs

| TFO         | Calculated [M-H] <sup>-</sup> | Found (m/z) |
|-------------|-------------------------------|-------------|
| TUG1-3Me    | 6278.163                      | 6280.429    |
| VEGFA-1-3Me | 6591.221                      | 6591.355    |
| VEGFA-2-3Me | 6975.363                      | 6974.055    |
| HMGA1-3Me   | 6703.273                      | 6705.446    |
| c-MET-3Me   | 7144.378                      | 7143.261    |

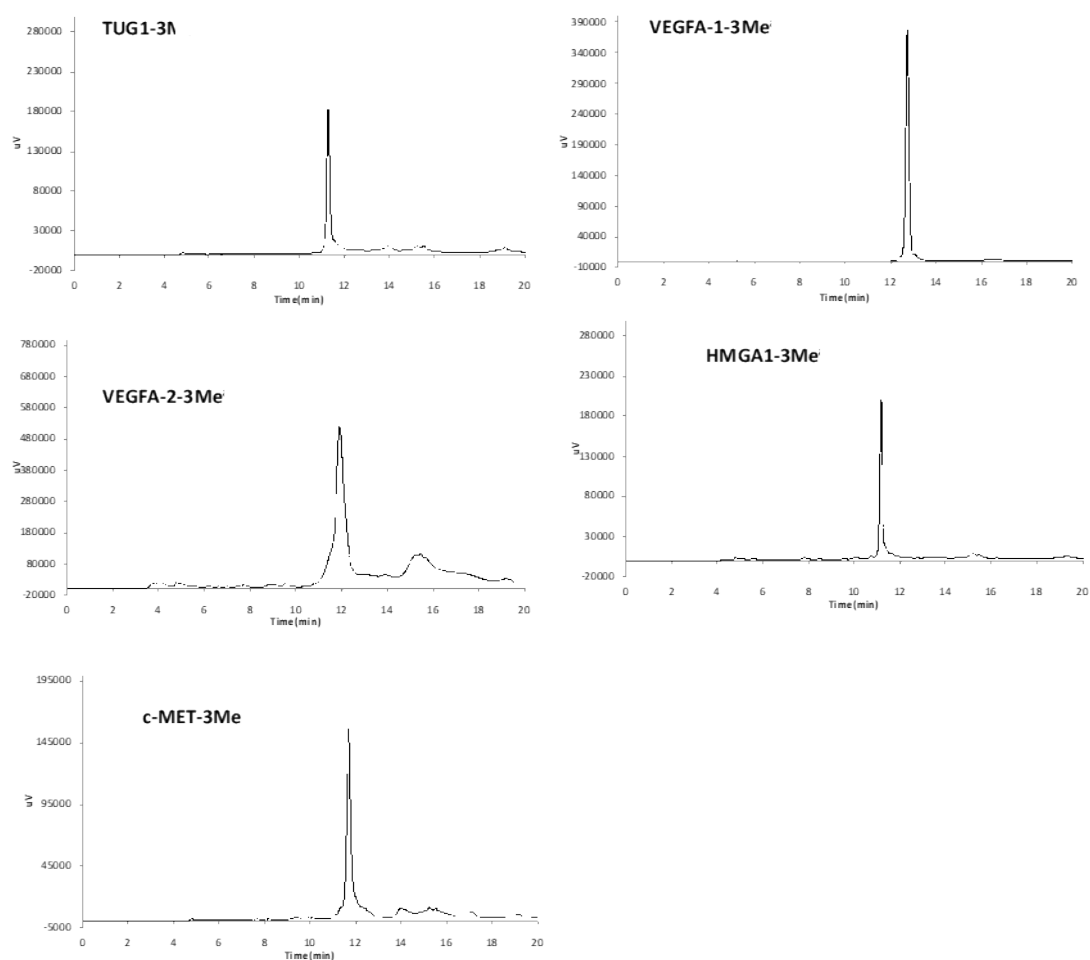

Figure S1. HPLC charts of synthesized antigene TFOs: SHISEIDO, CAPCELL PACK, C<sub>18</sub>, 4.6ID x 250 mm, MG, 5 μm, Solution: A) 0.1M TEAA buffer (pH 7.0), B) CH<sub>3</sub>CN. Program: B% 8-20%/20 min, 20-100%/22 min, 100%/27 min, 100-8%/28 min, Flow rate: 1 mL/min, UV: 254 nm, Column oven: 55 °C.

**(A) TUG1-TTS**

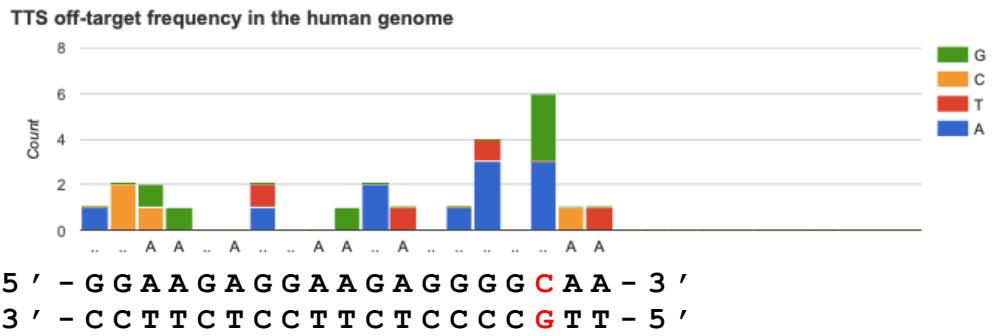

**(B) VEGFA1-TTS**

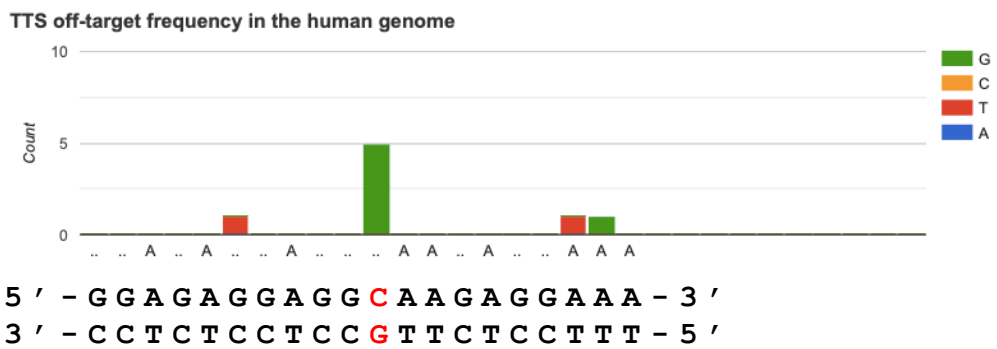

Figure S2. TTS off-target frequency analysis from a database with mismatches set at the CG inversion site against (A) TUG1 gene and (B) VEGFA gene.

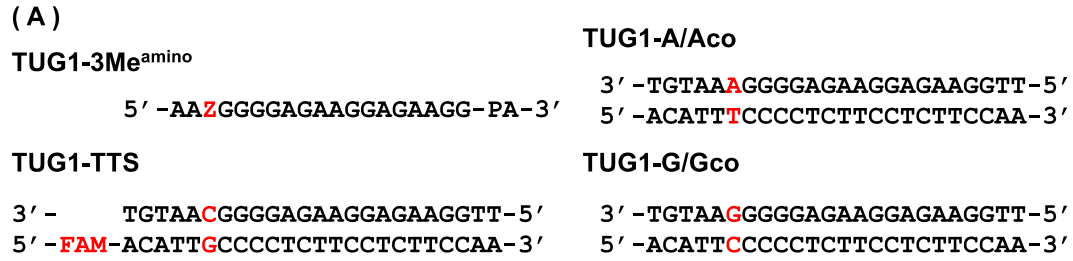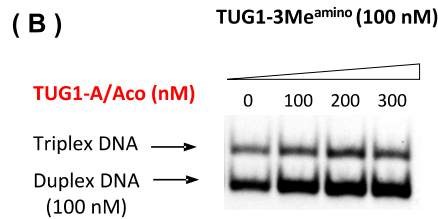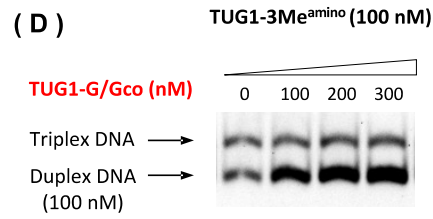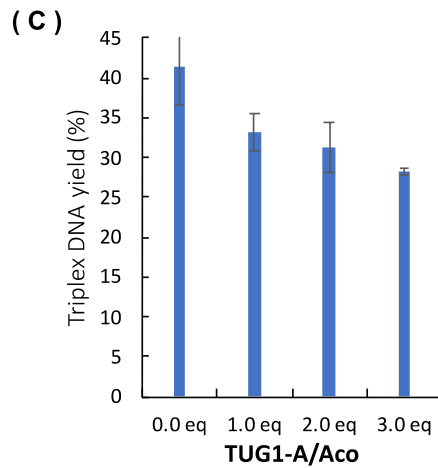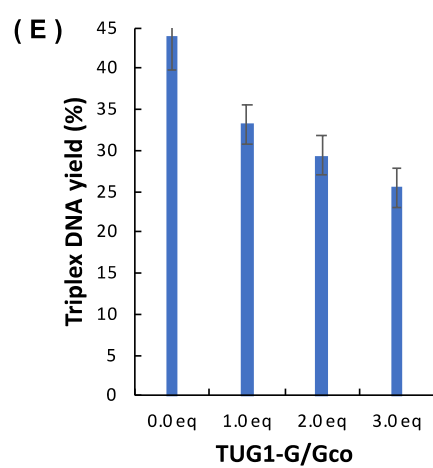

Figure S3. The evaluation of competitive triplex-forming ability of TFOs against TUG1-TTSs and similar sequences. (A) sequences for gel-shift assay. (B) FAM-labeled TUG1 TTS (100 nM) and TUG-3Me<sup>amino</sup> (100 nM) was incubated with increasing concentrations of TTS similar sequence TUG1-A/Aco (100, 200, and 300 nM) in the buffer containing 20 mM Tris-HCl, 5 mM MgCl<sub>2</sub> and 2.5 mM spermidine at pH 7.5 and 37 °C. Electrophoresis was performed with a 10% non-denaturing polyacrylamide gel at 4 °C. (C) triplex DNA formation yield for TUG-3Me<sup>amino</sup> with the presence TUG-A/Aco. (D) FAM-labeled TUG1 TTS (100 nM) and TUG-3Me<sup>amino</sup> (100 nM) was incubated with increasing concentrations of TTS similar sequence TUG1-G/Gco (100, 200, and 300 nM) in the buffer containing 20 mM Tris-HCl, 5 mM MgCl<sub>2</sub> and 2.5 mM spermidine at pH 7.5 and 37 °C. Electrophoresis was performed with a 10% non-denaturing polyacrylamide gel at 4 °C. (E) triplex DNA formation yield for TUG-3Me<sup>amino</sup> with the presence TUG-G/Gco.

(A)

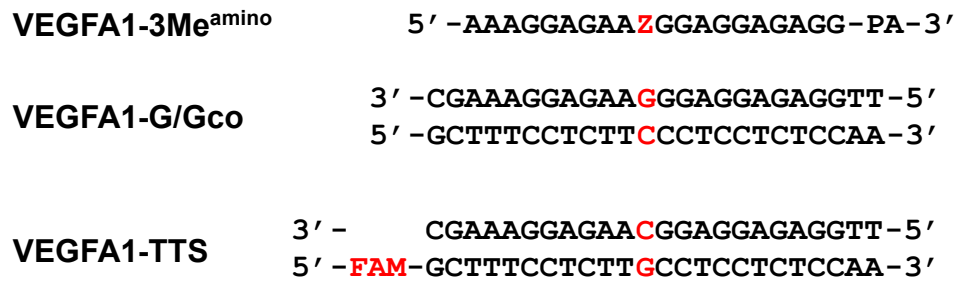

(B)

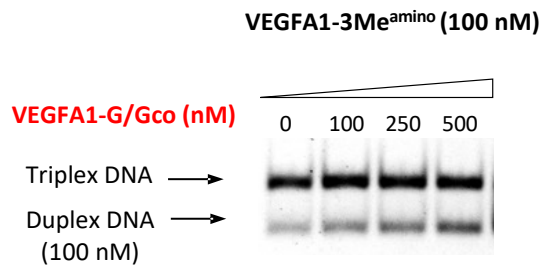

(C)

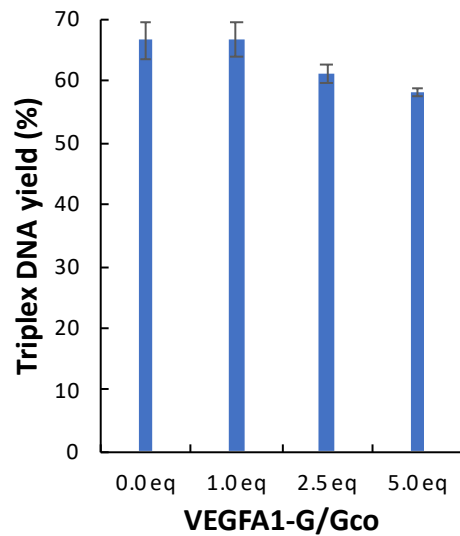

Figure S4. The evaluation of competitive triplex-forming ability of TFOs against VEGFA1-TTSs and similar sequences. (A) sequences for gel-shift assay. (B) FAM-labeled VEGFA1 TTS (100 nM) and VEGFA1-3Me<sup>amino</sup> (100 nM) was incubated with increasing concentrations of TTS similar sequence VEGFA1-G/Gco (100, 250, and 500 nM) in the buffer containing 20 mM Tris-HCl, 5 mM MgCl<sub>2</sub> and 2.5 mM spermidine at pH 7.5 and 37 °C. Electrophoresis was performed with a 10% non-denaturing polyacrylamide gel at 4 °C. (C) triplex DNA formation yield for VEGFA1-3Me<sup>amino</sup> with the presence VEGFA1-G/Gco.

Table S3. Primer sequences for RT-qPCR.

| Gene               | Forward primer<br>5' to 3' | Reverse primer<br>5' to 3' |
|--------------------|----------------------------|----------------------------|
| TUG1 <sup>1</sup>  | TAGCAGTTCCCAATCCTTG        | CACAAATCCCATCATTCCC        |
| HMGA1 <sup>2</sup> | AACCAGCACAAAGTCCAGGAGGG    | AAAGCTGTCCAGTCCCAGAAGG     |
| c-MET <sup>3</sup> | CAGGCAGTGCAGCATGTAGT       | GATGATTCCCTCGGTCAGAA       |
| VEGFA <sup>4</sup> | CTTGCCTTGCTGCTCTACC        | CACACAGGATGGCTTGAAG        |
| GAPDH <sup>4</sup> | GGAGTCCCTGCCCACTCA         | GCCCCTCCCCTCTTCAAG         |

References:

1. Cell Death and Disease (2016) 7, e2109; Oncology Lett. 16: 5317-5324, 2018.
2. Mol. BioSyst., 2011, 7, 1336-1346; and other published paper in this lab.
3. Cancer Res. 2015 Oct 1; 75(19): 4131–4142.; J. Biol. Chem. (2020) 295(2) 481–503
4. J Biol Chem. 2015 Sep 4; 290(36): 22212–22224.

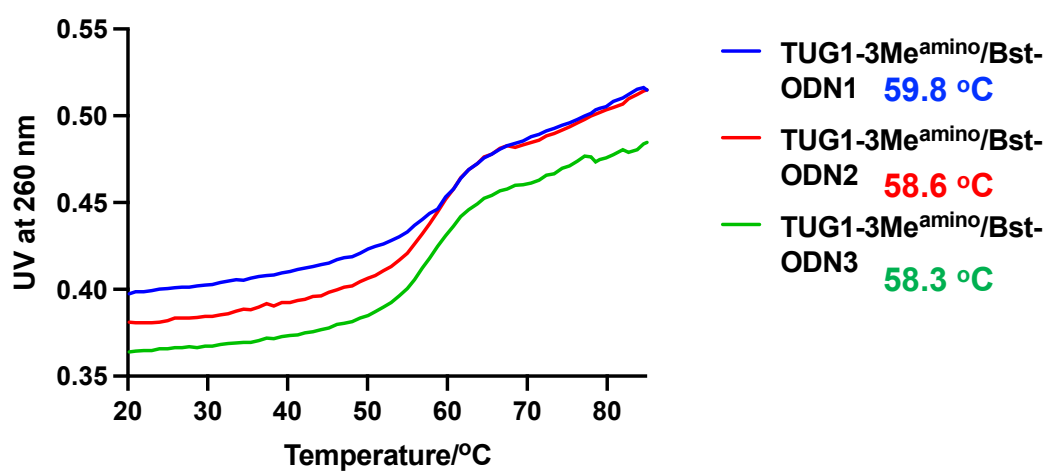

Figure S5. Melting curve measurement, melting temperature ( $T_m$ ) determination of duplex DNA between TUG1-3Me<sup>amino</sup> and Bst-ODNs. 1  $\mu$ M of each TUG1-3Me<sup>amino</sup> and Bst-ODN was heated to 90 °C for 5 min and annealed by slow cooling in PBS buffer. UV melting behavior was monitored at 260 nm between 20 and 90 °C at a rate of 1.0 °C/min using a DU 800 spectrometer (Beckman Coulter), and melting data were analyzed by the program MeltWin (v3.5).



Tables S4. Appendix data of values used in Figure 7

| Gene name                   | log2(fold_change) | Gene name     | log2(fold_change) | Gene name                     | log2(fold_change) | Gene name        | log2(fold_change) |
|-----------------------------|-------------------|---------------|-------------------|-------------------------------|-------------------|------------------|-------------------|
| SAMD11                      | -2.17891          | FRMD8         | 0.290669          | ZFP106                        | -1.09268          | HNRNPUL1         | -0.494304         |
| ISG15                       | 2.34141           | NEAT1         | -1.74498          | TP53BP1                       | -0.690588         | CCDC97           | 0.495304          |
| AGRN                        | -0.667953         | SCYL1         | 0.722492          | MFAP1                         | 0.0534564         | BCKDHA           | 0.324618          |
| B3GALT6                     | 0.488461          | FAM89B,SSSCA1 | 0.926458          | FBN1                          | -1.91007          | RPS19            | 1.24076           |
| PUSL1                       | 0.536013          | EHBP1L1       | -0.391536         | COPS2                         | -0.572921         | ARHGEF1          | 0.2482            |
| GLTPD1                      | 0.850647          | PCNXL3        | -0.299441         | GABPB1                        | 0.103573          | CIC,LOC100652741 | -0.516014         |
| ATAD3B                      | 0.690431          | KAT5          | 0.260968          | SPPL2A                        | -0.535659         | PVR              | 0.397776          |
| ATAD3A                      | 0.554627          | MUS81         | 0.429938          | LEO1                          | -0.213833         | BCL3             | 0.460715          |
| MIB2                        | 0.945896          | CCDC85B       | 0.479268          | GNB5                          | 0.190829          | PVRL2            | 0.427772          |
| SKI                         | -1.02929          | DRAP1         | 1.07625           | ARPP19                        | -1.1974           | TOMM40           | 0.718792          |
| RER1                        | 0.671085          | SART1         | 0.51222           | RSL24D1                       | 0.395893          | CLPTM1           | 0.269599          |
| TPRG1L                      | 0.809162          | BANF1         | 0.608031          | CCPG1,DYX1C1,<br>DYX1C1-CCPG1 | -0.338967         | CLASRP           | 0.54158           |
| CAMTA1                      | 0.0537567         | SF3B2         | 0.747124          | ADAM10                        | -1.18738          | GEMIN7,PPP1R37   | 0.635403          |
| VAMP3                       | -0.0438829        | PACS1         | -0.606816         | SLTM                          | -0.27672          | VASP             | 0.40951           |
| PARK7                       | 0.492383          | KLC2          | 0.687692          | MYO1E                         | -0.308971         | QPCTL            | -0.0470123        |
| SPSB1                       | 0.613859          | RAB1B         | 0.168637          | GTF2A2                        | 0.0361567         | PPP5C            | 0.0208619         |
| SLC25A33                    | 0.338236          | DPP3          | 0.266139          | BNIP2                         | -0.585448         | CALM3            | -0.373726         |
| TMEM201                     | 0.165889          | C11orf80,RCE1 | 0.914324          | ANXA2                         | 0.201016          | ARHGAP35         | -1.04256          |
| UBE4B                       | -1.27019          | LRFN4         | 0.42895           | RPS27L                        | 0.343009          | SAE1             | -0.0970511        |
| KIF1B                       | -1.24974          | SYT12         | -0.151185         | CA12                          | -0.0771965        | CCDC9            | 1.02597           |
| PGD                         | 0.40779           | RHOD          | 0.605804          | FAM96A                        | 0.335699          | DHX34            | 0.581452          |
| APITD1,APITD1-<br>CORT,CORT | 0.435464          | KDM2A         | -0.0821031        | PPIB                          | 1.06957           | EHD2             | -0.691486         |
| PEX14                       | 0.410253          | ADRBK1        | -0.062104         | KIAA0101                      | 0.148431          | GLTSCR2          | 0.608793          |
| TARDBP                      | -0.824323         | RPS6KB2       | 0.333476          | OAZ2                          | 0.23015           | SEPW1            | 0.273291          |
| UBIAD1                      | 0.163735          | AIP           | 0.709983          | SPG21                         | -0.15649          | EMP3             | 1.23199           |
| AGTRAP                      | 0.913894          | GSTP1         | 0.677901          | CLPX                          | -0.215667         | GRWD1            | 0.150429          |
| PLOD1                       | -<br>0.00531896   | NDUFV1        | 0.458634          | VWA9                          | 0.20053           | CYTH2            | 0.55904           |
| MFN2                        | -0.247902         | ALDH3B1       | -0.537            | TIPIN                         | 0.0649469         | PPP1R15A         | 3.85027           |
| MIIP                        | 0.938642          | NDUFS8        | 0.700104          | RPL4                          | 0.515493          | NUCB1            | 0.580399          |
| EFHD2                       | 0.192774          | TCIRG1        | 0.126771          | AAGAB                         | -0.0177778        | BAX              | 0.626342          |
| PLEKHM2                     | 0.492418          | LRP5          | -0.379668         | CLN6                          | 0.584969          | FTL              | 1.1084            |

|                               |            |              |            |                           |            |                      |            |
|-------------------------------|------------|--------------|------------|---------------------------|------------|----------------------|------------|
| FBLIM1                        | 0.306919   | PPP6R3       | -0.958709  | ITGA11                    | -1.98649   | RUVBL2               | 0.490921   |
| SZRD1                         | 0.076446   | GAL          | 0.879928   | ANP32A                    | -0.422381  | SNRNP70              | 0.417734   |
| NECAP2                        | 0.33508    | CCND1        | 0.80073    | TLE3                      | -0.0212328 | RPL13A               | 0.723996   |
| MRT04                         | 0.614368   | FADD         | 0.51466    | LARP6                     | 1.6015     | RPS11                | 0.915708   |
| C1orf151-<br>NBL1,MINOS1,NBL1 | 0.690469   | PPFIA1       | -0.373624  | PKM                       | 0.534771   | RCN3                 | 1.03392    |
| CDA,PINK1                     | 0.454507   | CTTN         | 0.149491   | HEXA                      | 0.640133   | PRR12,SCAF1          | 0.258139   |
| ALPL                          | -0.378004  | RNF121       | 0.213062   | ADPGK                     | 0.402087   | BCL2L12              | 0.748702   |
| CDC42                         | -0.38806   | INPPL1       | 0.706187   | NPTN                      | -0.624365  | PRMT1                | 0.3214     |
| EPHB2                         | 0.687426   | ARHGEF17     | -0.997119  | UBL7                      | 0.504574   | AP2A1                | -0.0330919 |
| KDM1A                         | -0.247355  | MRPL48       | 0.430086   | EDC3                      | 0.337874   | MED25                | 0.214329   |
| RPL11                         | 0.845918   | PAAF1        | 0.340904   | ULK3                      | 0.388142   | PTOV1                | 0.21426    |
| TCEB3                         | 0.203508   | PPME1        | -0.298189  | SCAMP2                    | 0.662434   | TBC1D17              | 0.507661   |
| PITHD1                        | 0.456148   | POLD3        | -0.567102  | COX5A                     | 0.75049    | ATF5,MIR4751         | 1.08818    |
| LYPLA2                        | 0.489684   | SPCS2        | 0.57226    | RPP25                     | 1.53207    | NR1H2                | 0.689759   |
| PNRC2                         | -0.95543   | RPS3         | 0.639341   | SIN3A                     | -0.854675  | POLD1                | -0.0311601 |
| SRRM1                         | -0.595747  | SERPINH1     | 0.156805   | PTPN9                     | 0.346523   | EMC10                | 0.40985    |
| CLIC4                         | -1.53453   | TSKU         | 0.142812   | SNUPN                     | 0.113555   | PPP2R1A              | 0.155419   |
| TMEM50A                       | 0.0124566  | AAMDC        | 0.763228   | IMP3                      | 0.86598    | MYADM                | -0.106121  |
| SEPN1                         | -0.789404  | LOC100506233 | -0.690414  | CSPG4                     | 0.626183   | NDUFA3               | 0.838959   |
| FAM54B                        | -0.0321723 | TMEM126B     | -0.405905  | FBXO22-AS1                | 0.107403   | PRPF31               | 0.318886   |
| ZNF593                        | 1.48469    | TMEM126A     | -0.0550337 | ETFA                      | 0.270636   | CNOT3                | 0.321977   |
| CEP85                         | -0.326547  | EED          | 0.191108   | TSPAN3                    | 0.145806   | TSEN34               | 0.408357   |
| SH3BGRL3                      | 1.21651    | C11orf73     | 0.318746   | WDR61                     | 0.173581   | RPS9                 | 1.09323    |
| DHDDS                         | 0.580662   | PRSS23       | 0.132277   | MTHFS,ST20,ST2<br>0-MTHFS | 0.650033   | LENG8                | -0.501334  |
| HMG2                          | -0.0955101 | MED17        | -0.321931  | MESDC2                    | 0.32503    | RPL28                | 1.00896    |
| RPS6KA1                       | 0.0177941  | CEP57        | -0.391214  | C15orf40                  | 0.0982249  | NAT14,ZNF628         | 0.0371915  |
| ARID1A                        | -1.00404   | YAP1         | -1.25122   | BTBD1                     | -0.719713  | ZNF580               | -0.0774554 |
| SFN                           | 1.21455    | AASDHPPT     | -0.974657  | WDR73                     | 0.606007   | ZNF581               | 1.30233    |
| NUDC                          | 0.740447   | ACAT1        | -0.365849  | NMB                       | 0.643066   | U2AF2                | -0.138915  |
| TMEM222                       | 0.882926   | DDX10        | 1.04024    | SEC11A                    | 0.363274   | EPN1                 | 0.446491   |
| PPP1R8                        | 0.125336   | DLAT         | -0.85028   | MRPL46                    | 0.56499    | ZNF444               | 0.913274   |
| ATPIF1                        | 0.277898   | SDHD         | -0.523685  | POLG                      | -0.0139286 | TRAPPC2P1,ZNF54<br>7 | 1.29481    |
| PHACTR4                       | -1.08874   | PTS          | 0.676861   | ANPEP                     | 0.263185   | ZNF749               | 0.889037   |
| RCC1,SNHG3                    | 0.0250329  | NNMT         | 0.00442146 | CIB1                      | 0.396602   | RPS5                 | 0.957529   |

|                |            |                      |            |              |            |             |           |
|----------------|------------|----------------------|------------|--------------|------------|-------------|-----------|
| RNU105A        | -0.238036  | REXO2                | 0.0198448  | PRC1         | -0.830924  | TRIM28      | 0.342318  |
| TRNAU1AP       | 0.254652   | PAFAH1B2             | -0.772803  | CHSY1        | -0.917206  | MGC2752     | 0.0200122 |
| YTHDF2         | -0.0778956 | TAGLN                | 0.102819   | VIMP         | 1.77177    | PPAP2C      | 0.724769  |
| ZCCHC17        | 0.564027   | ATP5L                | 0.568063   | SNRPA1       | 0.748861   | POLRMT      | 0.357904  |
| SERINC2        | 0.486821   | ARCN1                | -0.374093  | TM2D3        | -0.128175  | RNF126      | 0.603422  |
| TINAGL1        | 0.563108   | PHLDB1               | -0.751902  | SNRNP25      | 0.463456   | MED16       | 0.0140408 |
| KHDRBS1        | -0.633018  | MIR3656,TRAPPC4      | 0.735029   | MPG          | 0.740397   | R3HDM4      | 0.342251  |
| TMEM39B        | 0.177232   | HMBS                 | 0.364225   | ITFG3        | -0.273043  | C19orf6     | 0.700139  |
| KPNA6          | -0.38713   | RNF26                | -0.0622576 | NME4         | 0.127348   | POLR2E      | 0.269111  |
| TXLNA          | 0.138362   | SC5DL                | -1.49078   | DECR2        | -0.0615994 | SBNO2       | 0.0762498 |
| EIF3I          | 0.59922    | GRAMD1B,LOC100128242 | -0.0128056 | MIR3176,SOLH | 0.367875   | GAMT        | 0.329577  |
| HDAC1          | 0.0339695  | EI24                 | -0.436072  | PIGQ         | -0.241052  | MEX3D       | 0.0223783 |
| RBBP4          | -0.599058  | STT3A                | 0.213442   | RAB40C       | 0.178437   | MBD3,UQCR11 | 0.569273  |
| KIAA1522       | -0.39353   | CHEK1                | -0.427584  | FAM195A      | 1.1421     | TCF3        | -0.233902 |
| ZMYM4          | -1.04641   | FOXRED1              | 0.508564   | WDR90        | 0.15745    | KLF16       | 0.501267  |
| NCDN           | -0.164305  | DCPS                 | 0.0969863  | RHOT2        | 0.315282   | FAM108A1    | 0.637735  |
| ADPRHL2        | 0.716028   | ST3GAL4              | 0.35418    | STUB1        | 0.592007   | BTBD2       | -0.149441 |
| MAP7D1         | 0.570359   | APLP2                | -0.261082  | FAM173A      | 0.259989   | MKNK2       | 0.72636   |
| THRAP3         | -0.424979  | BET1L                | 0.165778   | HAGHL        | -0.0512467 | AP3D1       | -0.216904 |
| CDCA8          | -0.415591  | IFITM3               | 0.354742   | MSLN         | -0.0802751 | PLEKHJ1     | 0.409169  |
| MANEAL         | 0.219287   | RNH1                 | 0.617959   | CHTF18       | 0.64918    | LSM7        | 0.847032  |
| C1orf122       | 1.55447    | HRAS                 | 0.805924   | UBE2I        | 0.442141   | TIMM13      | 0.856705  |
| UTP11L         | 0.557447   | DEAF1                | 0.414285   | GNPTG        | 0.629488   | LMNB2       | -0.302545 |
| AKIRIN1        | -0.129151  | SLC25A22             | 0.58806    | TELO2        | 0.306495   | SLC39A3     | 0.598093  |
| NDUFSS         | 0.769594   | POLR2L               | 0.977641   | HN1L         | -0.126247  | SGTA        | 0.773023  |
| KIAA0754,MACF1 | -1.54405   | CHID1                | 0.10741    | NUBP2        | 0.442053   | AES         | 0.268012  |
| PPIE           | 0.571581   | CTSD                 | 0.841702   | FAHD1        | 0.362867   | DOHH        | 1.01423   |
| CAP1           | -0.115363  | CDKN1C               | 0.489431   | NDUFB10      | 0.663725   | MFSD12      | 0.452918  |
| ZMPSTE24       | -0.862179  | PHLDA2               | 2.11958    | SNHG9        | 1.62807    | C19orf71    | 0.388446  |
| NFYC           | 0.260547   | NAP1L4               | -0.111099  | TBL3         | 0.311319   | C19orf71    | -0.209001 |
| CTPS1          | 0.0826831  | CARS                 | 1.44106    | GFER         | 0.768395   | C19orf71    | 0.229339  |
| PPCS           | -0.0108099 | NUP98                | -0.876492  | SLC9A3R2     | 0          | C19orf71    | -0.637327 |
| PPIH           | 0.762857   | RHOG                 | 0.99285    | TSC2         | 0.190542   | TBXA2R      | -0.405652 |
| YBX1           | 0.394737   | PRKCDBP              | 1.43839    | TRAF7        | -0.645105  | CACTIN      | 0.366228  |
| CDC20          | -0.103508  | ARFIP2               | 0.407293   | MLST8        | 0.252776   | PIP5K1C     | -0.638062 |

|                             |            |               |           |              |            |               |            |
|-----------------------------|------------|---------------|-----------|--------------|------------|---------------|------------|
| PTPRF                       | -0.766813  | RRP8          | 0.320361  | E4F1         | 0.285122   | DAPK3         | 0.511304   |
| KDM4A                       | -0.228756  | TAF10         | 0.45496   | CCNF         | -0.748298  | EEF2          | 0.213523   |
| IPO13                       | 0.360366   | TPP1          | -0.32989  | C16orf59     | 0.223823   | ZBTB7A        | -0.0276431 |
| DPH2                        | 0.337804   | MRPL17        | 0.556684  | ATP6V0C      | 1.11408    | MAP2K2        | 0.762552   |
| ATP6V0B                     | 1.32685    | LMO1          | -1.28089  | AMDHD2       | 0.6074     | SH3GL1        | -0.0567817 |
| B4GALT2                     | 0.397609   | ST5           | -0.387978 | PDPK1        | -0.70314   | UBXN6         | 0.331586   |
| DMAP1                       | 0.618242   | TMEM9B        | -0.19285  | KCTD5        | 0.953776   | C19orf10      | 1.33694    |
| RNF220                      | 0.0785159  | DENND5A       | -0.23779  | SRRM2        | -1.08772   | DPP9          | 0.388247   |
| KIF2C                       | -0.009787  | TMEM41B       | -0.155016 | PRSS21       | 0.431088   | TICAM1        | 1.16507    |
| RPS8                        | 0.587693   | EIF4G2        | -0.54893  | FLYWCH2      | -0.281296  | PLIN3         | 0.0849689  |
| UROD                        | 0.844286   | ZBED5         | -0.79114  | FLYWCH1      | 0.617134   | PTPRS         | -0.918745  |
| HPDL                        | 0.627098   | DKK3          | 0.0192958 | PAQR4        | -0.545166  | SAFB2         | 0.304838   |
| TOE1                        | 0.625657   | LOC100506305  | 0.378287  | TNFRSF12A    | 0.970617   | C19orf70      | 0.579878   |
| AKR1A1                      | 0.371078   | RRAS2         | 0.703722  | THOC6        | -0.156016  | LONP1         | 0.769984   |
| NASP                        | 0.0408185  | COPB1         | -0.411988 | IL32         | 1.98067    | DUS3L         | 0.766343   |
| TMEM69                      | -0.224464  | PSMA1         | 0.368977  | NAA60        | 0.337679   | NDUFA11       | 1.02231    |
| MAST2                       | -0.230298  | RPS13         | 0.535657  | GLIS2        | -0.469473  | RANBP3        | 0.132446   |
| RAD54L                      | 0.175021   | SAAL1         | 0.171469  | VASN         | 0.765193   | MLLT1         | -0.482512  |
| UOQRH                       | 0.586637   | TSG101        | 0.542413  | DNAJA3       | 0.300121   | GTF2F1        | 0.224858   |
| CMPK1                       | -0.811003  | SVIP          | -0.792225 | HMOX2        | 0.855387   | KHSRP,MIR3940 | -0.223321  |
| CDKN2C                      | -1.04753   | CCDC34        | -0.693613 | MGRN1        | -0.0843373 | SLC25A23      | -0.602785  |
| RNF11                       | -0.941177  | LGR4          | -1.90921  | NUDT16L1     | 0.164713   | GPR108        | 0.469103   |
| OSBPL9                      | -0.652789  | LIN7C         | -0.200654 | UBN1         | -0.267666  | XAB2          | 0.466205   |
| BTF3L4                      | -0.551398  | BDNF          | 0.123569  | ALG1         | 0.391038   | CTXN1         | -0.228962  |
| PRPF38A                     | -0.0123329 | KIF18A        | -1.22875  | PMM2         | 0.488136   | TIMM44        | 0.927356   |
| SCP2                        | -0.320605  | MPPED2        | -2.63252  | C16orf72     | -0.235353  | ELAVL1        | -0.386095  |
| LRRC42                      | 0.358646   | IMMP1L        | 0.0492271 | NUBP1        | 0.654743   | CD320         | 0.70258    |
| MRPL37                      | 0.417062   | CSTF3         | -0.592888 | LOC100505564 | -0.0594144 | NDUFA7        | 0.802103   |
| HEATR8,HEATR8-<br>TTC4,TTC4 | 0.619105   | C11orf91,CD59 | 0.37004   | BFAR         | 0.243377   | EIF3G         | 0.953807   |
| PCSK9                       | -0.669266  | FBXO3         | -0.538104 | NOMO1        | 0.229323   | DNMT1         | -0.600956  |
| USP1                        | -1.04793   | APIP          | 0.121521  | PDXDC1       | -0.51667   | FDX1L         | 1.14619    |
| PGM1                        | 0.0909925  | COMMD9        | 0.0375535 | C16orf45     | 0.641147   | RAVER1        | -0.253111  |
| AK4                         | -0.471199  | PEX16         | 0.848677  | MIR484,NDE1  | -0.157519  | TYK2          | -0.118035  |
| LEPR,LEPROT                 | -0.434349  | ARHGAP1       | -0.164283 | ABCC1        | -0.573503  | CDC37,MIR1181 | 0.616458   |
| MIER1                       | -1.27157   | CKAP5         | -0.72714  | PKD1P1       | 0.179125   | KEAP1         | 0.307581   |

|                                 |            |                  |                 |                         |            |              |            |
|---------------------------------|------------|------------------|-----------------|-------------------------|------------|--------------|------------|
| GADD45A                         | 2.20972    | ARFGAP2          | 0.298689        | ITPRIPL2                | -0.609123  | KRI1         | -0.0219052 |
| SRSF11                          | -0.70746   | PACSIN3          | 0.159216        | METTL9                  | -0.0450075 | AP1M2        | 0.337427   |
| TYW3                            | -0.346543  | ACP2             | -0.0903769      | UQCRC2                  | 0.0833503  | TMED1        | 0.625      |
| ACADM                           | -0.346648  | PSMC3            | 0.75011         | UBFD1                   | -0.360369  | YIPF2        | 0.492257   |
| RABGGTB                         | 0.694588   | CELF1            | -0.652107       | DCTN5                   | 0.0697422  | SPC24        | -0.367799  |
| NEXN                            | -1.02389   | KBTBD4           | -<br>0.00148723 | PLK1                    | -0.581779  | KANK2        | -0.625309  |
| DNAJB4                          | -0.791522  | MTCH2            | 0.0951483       | RBBP6                   | -0.453022  | TMEM205      | 1.20532    |
| IFI44L                          | -1.32212   | FNBP4            | -0.108992       | TNRC6A                  | -1.12048   | ECSIT_ZNF653 | 0.276477   |
| PRKACB                          | -1.00286   | NUP160           | -1.02517        | LCMT1,LOC55420<br>6     | 0.804465   | ELOF1        | 0.745974   |
| CYR61                           | -0.140549  | TNKS1BP1         | 0.311176        | CCDC101                 | 0.893321   | WDR83OS      | 0.645113   |
| SH3GLB1                         | -0.0890259 | SSRP1            | -<br>0.00160061 | EIF3C                   | -0.110882  | DHPS         | 0.349998   |
| HS2ST1                          | -1.0777    | SLC43A3          | 0.830371        | ATXN2L                  | 0.365149   | TNPO2        | 0.0145816  |
| LMO4                            | -1.58784   | TIMM10           | 0.758837        | SH2B1                   | 0.511225   | C19orf43     | 1.0306     |
| PKN2                            | -1.88115   | MED19            | 0.839049        | NFATC2IP                | -0.0896071 | PRDX2        | 0.539098   |
| LRRC8D                          | -0.398317  | OSBP             | 0.28401         | SPNS1                   | 0.848135   | DNASE2       | 0.348263   |
| ZNF326                          | -0.480775  | PATL1            | -0.365952       | QPRT                    | 0.638888   | FARSA        | 0.704561   |
| CDC7                            | -0.711874  | MRPL16           | 0.49714         | KIF22                   | 0.0577067  | GADD45GIP1   | 1.01168    |
| RPL5                            | 0.384381   | PRPF19           | 0.412135        | MAZ                     | -0.590056  | TRMT1        | 1.05339    |
| DR1                             | 0.219504   | DDB1             | -0.309834       | MVP,PAGR1               | 0.0938559  | STX10        | 0.38469    |
| FNBP1L                          | -1.43339   | CYBASC3          | -0.0165527      | ASPHD1                  | 0.884778   | SAMD1        | -0.180422  |
| ABCD3                           | -1.01381   | CPSF7            | 0.0644756       | TMEM219                 | 0.616185   | PRKACA       | -0.181147  |
| RWDD3, TMEM56, T<br>MEM56-RWDD3 | -1.2998    | C11orf10, MIR611 | 0.887227        | TAOK2                   | 0.141517   | ASF1B        | 0.0333059  |
| SNX7                            | -0.809217  | FADS1, MIR1908   | -0.538926       | INO80E                  | 0.726127   | DDX39A       | 0.688489   |
| HIAT1                           | -0.629369  | FADS3            | 1.07718         | ALDOA                   | 0.714544   | GIPC1        | 0.295033   |
| PRMT6                           | -0.740074  | FTH1             | 1.34507         | PPP4C                   | 0.684771   | DNAJB1       | 0.609163   |
| FAM102B                         | -2.15893   | AHNAK            | 0               | PRR14                   | 0.0111405  | NDUF87       | 0.860854   |
| PRPF38B                         | -0.128693  | EEF1G            | 0.52891         | FBRS                    | 0.638284   | ILVBL        | 0.300623   |
| STXBP3                          | -0.63382   | TUT1             | 0.573645        | LOC100862671, S<br>RCAP | 0          | NOTCH3       | -1.49924   |
| GPSM2                           | -1.04248   | EML3, MTA2       | 0.134372        | RNF40                   | 0.350302   | BRD4         | -0.432613  |
| SARS                            | 1.12884    | B3GAT3           | 0.600593        | FBXL19                  | 0.174415   | AKAP8        | 0.411658   |
| GNAI3                           | -0.488806  | GANAB            | -0.103256       | SETD1A                  | -0.0433084 | AKAP8L, WIZ  | 0.344916   |
| AMPD2                           | 0.115758   | INTS5            | 0.172866        | STX4                    | 1.0185     | EPS15L1      | 0.272923   |

|                                     |            |                                   |                 |                             |            |                                   |           |
|-------------------------------------|------------|-----------------------------------|-----------------|-----------------------------|------------|-----------------------------------|-----------|
| GSTM4                               | -0.371002  | C11orf48                          | 0.889084        | BCKDK,KAT8,LO<br>C100996366 | 0.240995   | CHERP                             | 0.135645  |
| CSF1                                | 0.359719   | UBXN1                             | 1.11609         | FUS,LOC1006527<br>40        | 0.185741   | SLC35E1                           | -0.160066 |
| AHCYL1                              | -0.733677  | BSCL2,HNRNPUL2,HNR<br>NPUL2-BSCL2 | -<br>0.00424538 | TGFB111                     | -0.0407409 | SMIM7                             | 0.609257  |
| STRIP1                              | 0.767602   | TMEM223                           | 0.320229        | ORC6                        | 0.579954   | HAUS8                             | 0.480603  |
| CEPT1                               | -0.78582   | NXF1                              | 0.630146        | PHKB                        | -0.810503  | NR2F6                             | 0.0982097 |
| ATP5F1                              | -0.0240978 | STX5                              | 1.45243         | LOC100507577,L<br>ONP2      | -0.969256  | BST2                              | 0.61614   |
| RAP1A                               | -0.265257  | WDR74                             | 0.971111        | ADCY7                       | -0.928357  | JUND                              | 0.309206  |
| DDX20                               | 0.106232   | SNHG1,SNORD22                     | 1.32888         | FTO                         | -1.0951    | LSM4                              | 0.379829  |
| CTTNBP2NL                           | -1.37939   | ATL3                              | -0.135441       | MMP2                        | 0.177691   | FKBP8                             | 0.271376  |
| CAPZA1                              | -0.763718  | MACROD1                           | 0.158904        | LPCAT2                      | 0.0380001  | CRLF1                             | 0.313125  |
| MOV10                               | -0.145586  | PPP1R14B                          | 0.555103        | OGFOD1                      | 0.235169   | COPE                              | 1.20322   |
| ATP1A1                              | 0.0866855  | BAD                               | 0.354487        | MT2A                        | 1.5841     | HOMER3                            | 0.976262  |
| PTGFRN                              | -1.30134   | TRMT112                           | 0.861415        | MT1E                        | 0.982653   | SUGP2                             | -0.444266 |
| TTF2                                | -1.10094   | SF1                               | 0.036187        | MT1A                        | 0.623335   | TMEM161A                          | 0.350809  |
| WDR3                                | -0.479722  | MEN1                              | 0.257374        | MT1X                        | 0.331485   | MEF2B,MEF2B,MEF2B,M<br>EF2B,MEF2B | 0.681538  |
| PHGDH                               | 0.987189   | EHD1                              | 0.912206        | NUP93                       | 0.063636   | NR2C2AP                           | 0.567859  |
| SRGAP2B                             | -0.676021  | CDCA5                             | 0.872915        | HERPUD1                     | 1.82164    | SUGP1                             | 0.774515  |
| LOC100996517                        | -0.587918  | ZNHIT2                            | 1.12847         | CPNE2                       | -0.042844  | ATP13A1                           | 0.688769  |
| NOTCH2NL                            | 0.268796   | SYVN1                             | 1.13156         | RSPRY1                      | -0.716431  | UQCDFS1                           | 0.395668  |
| LIX1L                               | -0.88732   | LTBP3                             | -0.146167       | ARL2BP                      | -0.630027  | ANKRD27                           | -0.425489 |
| PIAS3                               | -0.210685  | MAP3K11                           | 0.558116        | COQ9                        | 0.264547   | PEPD                              | 0.326163  |
| RNF115                              | 0.126618   | RELA                              | 0.73269         | POLR2C                      | 0.489278   | ALKBH6                            | 0.780688  |
| CHD1L                               | -0.0838822 | RNASEH2C                          | 0.440243        | GPR56                       | -1.67989   | POLR2I                            | 0.934639  |
| VPS45                               | 0.298164   | CFL1                              | 0.214434        | KATNB1                      | 0.43531    | YIF1B                             | 0.562167  |
| MRPS21                              | 0.766084   | FIBP                              | 0.377142        | USB1                        | 0.12929    | CAPN12                            | 0.0536745 |
| PRPF3                               | 0.411738   | FOSL1                             | 2.75469         | CKLF,CKLF-<br>CMTM1,CMTM1   | 0.471366   | ECH1                              | 0.222794  |
| ECM1,TARS2                          | 0.151164   | C11orf68                          | 0.986791        | CMTM3                       | -0.100595  | HNRNPL                            | -0.284069 |
| MLLT11                              | -0.115735  | EIF1AD                            | 0.534574        | CBFB                        | -1.25001   | SIRT2                             | 0.584594  |
| SCNM1,TNFAIP8L2,<br>TNFAIP8L2-SCNM1 | 1.33364    | YIF1A                             | 0.721911        | NOL3                        | 0.601201   | SARS2                             | -0.104662 |
| PIP5K1A                             | -0.267489  | RIN1                              | 0.706014        | E2F4                        | 0.652772   | PAF1                              | 0.485297  |
| PSMD4                               | 0.765498   | BRMS1                             | 0.858478        | TMEM208                     | 1.01736    | RPS16                             | 0.989566  |

|                           |            |                                 |                 |           |                 |               |            |
|---------------------------|------------|---------------------------------|-----------------|-----------|-----------------|---------------|------------|
| PSMB4                     | 0.894339   | B3GNT1                          | -0.154367       | FAM65A    | 0.312086        | FBL           | 0.504108   |
| TUFT1                     | 0.138656   | MRPL11                          | 0.582001        | CTCF      | -0.484171       | AKT2          | -0.36367   |
| CHTOP                     | 0.632718   | ZDHC24                          | 0.87156         | THAP11    | 0.131621        | C19orf47      | 0.286881   |
| SNAPIN                    | -0.0145217 | SPTBN2                          | -0.583676       | NUTF2     | 0.232079        | SERTAD3       | 0.900938   |
| NPR1                      | -0.574979  | PC                              | -0.888757       | EDC4      | -0.0877199      | BLVRB         | 1.3849     |
| INTS3                     | -0.543398  | CLCF1_POLD4                     | 0.801059        | PLA2G15   | 0.242363        | ADCK4_NUMBL   | 0.148112   |
| RPS27                     | 1.04482    | PPP1CA                          | 0.483886        | SLC7A6    | -1.03301        | TGFB1         | 0.557933   |
| UBAP2L                    | -0.260253  | CORO1B                          | 0.680835        | PRMT7     | -0.256223       | B9D2          | 0.127228   |
| HAX1                      | 1.24551    | TMEM134                         | 0.389192        | CIRH1A    | 0.232932        | EXOSC5        | 0.845226   |
| ATP8B2                    | -0.947131  | PITPNM1                         | -0.278353       | VPS4A     | 0.296658        | ATP5SL        | 0.18039    |
| CKS1B                     | 0.6385     | CDK2AP2                         | 0.788776        | NIP7      | 0.265553        | RABAC1        | 0.657888   |
| FLAD1                     | 0.526665   | LOC100996505                    | 0.504192        | CYB5B     | 0.0557996       | DEDD2         | 1.62719    |
| ZBTB7B                    | 0.0374218  | UNC93B1                         | -<br>0.00199382 | DDX19B    | 0.744142        | GSK3A         | 0.658934   |
| ADAM15                    | 0.203693   | CHKA                            | 0.809243        | DDX19A    | -<br>0.00108679 | ERF           | -0.0738192 |
| EFNA1                     | 0.260767   | SUV420H1                        | -0.183548       | SF3B3     | -0.418168       | PAFAH1B3      | 0.364287   |
| SLC50A1                   | 0.894121   | C11orf24                        | 0.293621        | IST1      | 0.209595        | ETHE1         | 0.68902    |
| MTX1                      | 0.701438   | CPT1A                           | 0.0358945       | DHX38     | 0.0525539       | XRCC1         | 0.131114   |
| FDPS                      | 0.50262    | MRPL21                          | 0.725502        | PSMD7     | 0.177486        | ZNF428        | 0.491357   |
| RUSC1                     | 0.423568   | DHCR7                           | -0.361125       | ZNRF1     | -0.679969       | PLAUR         | 1.14724    |
| DAP3                      | 0.570875   | NUMA1                           | -0.0123639      | GABARAPL2 | 0.323438        | SMG9          | 1.04158    |
| LAMTOR2                   | 0.675619   | LAMTOR1                         | 0.844341        | TERF2IP   | 0.53559         | KCNN4         | 0.698608   |
| LMNA                      | 0.378755   | ANAPC15                         | 0.614066        | CENPN     | 0.250605        | ERCC2         | -0.222204  |
| SLC25A44                  | 0.142064   | CLPB                            | 0.080393        | ATMIN     | -0.148906       | PPP1R13L      | 0.164681   |
| BGLAP,PMF1,PMF1-<br>BGLAP | 0.451025   | PDE2A                           | 0.529324        | CMIP      | -0.880117       | ERCC1         | 0.543558   |
| APOA1BP                   | 0.229462   | ARAP1                           | 0.208436        | CDH13     | -0.670048       | SNRPD2        | 0.767015   |
| PRCC                      | 0.736885   | RAB6A                           | -0.476859       | HSBP1     | 0.785438        | FBXO46        | -0.0499284 |
| KIRREL                    | -0.718591  | COA4                            | 0.154888        | WFDC1     | 0.540574        | DMPK,DMWD     | 0.327045   |
| DUSP23                    | 0.758357   | UCP2                            | -1.13047        | USP10     | -0.113429       | SYMPK         | 0.0249982  |
| PEA15                     | 1.52691    | P4HA3                           | -0.274828       | COX4I1    | 0.916377        | IRF2BP1       | 0.888848   |
| NCSTN                     | -0.104779  | PRKRIR                          | -0.869979       | FOXF1     | 0.44537         | MYPOP         | -0.0955953 |
| UFC1                      | 0.755344   | CLNS1A                          | 0.08091         | FOXC2     | 0.713653        | DKFZp434J0226 | 0.953102   |
| USP21                     | -0.010465  | KCTD14,NDUFC2,NDUF<br>C2-KCTD14 | 0.239784        | MAP1LC3B  | 0.96396         | STRN4         | 0.296241   |
| NDUFS2                    | 0.0594597  | ALG8                            | -0.290067       | ZC3H18    | 0.089938        | SLC1A5        | 1.66075    |

|                |             |                                   |            |                         |                 |             |           |
|----------------|-------------|-----------------------------------|------------|-------------------------|-----------------|-------------|-----------|
| SDHC           | -0.089979   | NARS2                             | -0.107701  | CTU2                    | 0.47142         | AP2S1       | 0.781821  |
| DUSP12         | 0.711631    | PRCP                              | -0.125322  | CDT1                    | 0.48218         | TMEM160     | 0.284518  |
| ATF6           | 0.000760338 | CCDC90B                           | -0.323672  | TRAPPC2L                | 0.790407        | NAPA        | 0.569076  |
| UHMK1          | -2.00965    | CREBZF                            | -0.983841  | SPG7                    | 0.477003        | LIG1        | -0.585383 |
| UAP1           | 0.267028    | PICALM                            | -0.520823  | RPL13                   | 0.873331        | KDELR1      | 0.120587  |
| NUF2           | -0.727585   | CTSC                              | -0.55336   | CPNE7                   | 1.04549         | RPL18       | 1.05046   |
| PBX1           | -2.18738    | CHORDC1                           | -0.32531   | CDK10                   | 0.704362        | RASIP1      | 1.45228   |
| MGST3          | 0.330652    | SLC36A4                           | -0.658698  | LOC100128881,Z<br>NF276 | 0.221348        | BCAT2       | 0.437879  |
| MIR3658,UCK2   | 0.294574    | C11orf75                          | 0.0933558  | TCF25                   | -0.0647852      | GYS1        | 0.0945459 |
| POGK           | -0.433802   | MIR1304,SNORA18,SNO<br>RA40,TAF1D | 1.03189    | TUBB3                   | 0.876633        | TEAD2       | -0.236152 |
| MPZL1          | -0.192046   | MRE11A                            | -1.25366   | DEF8                    | 0.935121        | PIH1D1      | 0.75635   |
| DCAF6          | -0.944343   | CWC15                             | 0.684824   | POLR3K                  | 0.777704        | NOSIP       | 0.974104  |
| TIPRL          | 0.01295     | MTMR2                             | -0.656406  | NPRL3                   | 0.156918        | RRAS        | 0.447161  |
| LOC100996595   | -0.0624388  | TMEM123                           | -1.64901   | LUC7L                   | 0.354027        | IRF3        | 0.994284  |
| ATP1B1         | -0.567358   | SLC35F2                           | 0.198359   | AXIN1                   | 0.793462        | PNKP        | 0.337146  |
| BLZF1          | 0.149732    | KDELC2                            | -1.12484   | MRPL28                  | 0.598869        | AKT1S1      | 0.586225  |
| C1orf112       | -0.413368   | RDX                               | -1.94476   | TMEM8A                  | 0.401878        | IL4I1,NUP62 | 0.054116  |
| PRRC2C         | -1.74302    | PPP2R1B                           | -1.19638   | C16orf13                | 0.689176        | JOSD2       | 1.22686   |
| METTL13        | 0.410899    | CRYAB                             | -0.466622  | JMJD8                   | 0.322562        | C19orf48    | 1.17466   |
| PRDX6          | 0.183622    | TIMM8B                            | 0.604459   | NARFL                   | 0.402238        | ETFB        | 0.438892  |
| DARS2          | -0.707842   | IL18                              | -0.619926  | TSR3                    | 0.737188        | TFPT        | 1.18592   |
| CACYBP         | 0.260593    | ZNF259                            | 0.866949   | C16orf91,UNKL           | 0.435975        | MBOAT7      | -0.176013 |
| FAM20B         | -1.00688    | PCSK7                             | -0.400775  | CLCN7                   | 1.11266         | PPP1R12C    | 1.17262   |
| TOR3A          | 0.153092    | BACE1                             | -0.839379  | NME3                    | 0.389387        | PPP6R1      | 0.41585   |
| SOAT1          | -0.356751   | DDX6                              | -0.996947  | MRPS34                  | 0.673662        | HSPBP1      | 0.596877  |
| TOR1AIP1       | -0.55143    | BCL9L                             | -0.394309  | SPSB3                   | 0.833926        | IL11        | 1.117     |
| FLJ23867,QSOX1 | 0.700414    | RPS25                             | 0.641421   | HAGH                    | 0.592741        | UBE2S       | 0.607542  |
| XPR1           | -1.4666     | SLC37A4                           | -0.0419666 | MSRB1                   | -<br>0.00185665 | ISOC2       | 0.917375  |
| IER5           | 1.09685     | HYOU1                             | 1.07278    | RPS2                    | 0.635246        | ZNF579      | 0.912526  |
| DHX9           | -0.668406   | H2AFX                             | 0.335079   | SNORA10                 | 0.0287946       | ZNF787      | 0.751884  |
| LAMC1          | -1.05151    | DPAGT1                            | 0.283808   | ZNF598                  | 0.708549        | SLC27A5     | 0.831036  |
| SMG7           | -0.214784   | MCAM                              | -0.11471   | NTHL1                   | 0.194956        | CHMP2A      | 0.340293  |
| TSEN15         | -0.587245   | THY1                              | 0.107989   | PKD1                    | -0.0677039      | UBE2M       | 0.694115  |



|               |            |                 |           |                             |            |              |            |
|---------------|------------|-----------------|-----------|-----------------------------|------------|--------------|------------|
| PLA2G4A       | -0.232063  | HSPA8           | 0.259439  | LOC100507303                | 1.01495    | ACP1         | 0.312488   |
| RGS2          | 0.662051   | SRPR            | 0.432818  | PGP                         | 0.204987   | TRAPPC12     | 0.647654   |
| TROVE2        | -0.756681  | ADAMTS8         | -1.51177  | EC1                         | 0.779639   | RPS7         | 0.787047   |
| CDC73         | -0.461188  | NCAPD3          | -0.818278 | TCEB2                       | 0.829365   | CPSF3        | 0.0296224  |
| CFH           | -0.820371  | THYN1           | 0.429996  | PKMYT1                      | 0.766646   | IAH1         | 0.109399   |
| CRB1          | -2.99563   | CCDC77          | -0.20954  | HCFC1R1                     | -0.614     | RRM2         | -0.099891  |
| C1orf53       | 0.351736   | WNK1            | -1.69126  | TRAP1                       | 0.294629   | HPCAL1       | 0.101098   |
| NEK7          | -1.59748   | ERC1            | -1.23742  | CREBBP                      | -1.19211   | DDX1         | -0.238632  |
| CAMSAP2       | -1.37713   | ADIPOR2         | -0.148719 | ADCY9                       | -0.813668  | RHOB         | -0.430838  |
| NAV1          | -0.551311  | FKBP4           | 0.304502  | TFAP4                       | 0.0529676  | CENPO        | -0.066722  |
| IPO9,SHISA4   | -1.50868   | RHNO1           | -0.177593 | COR07,CORO7-<br>PAM16,PAM16 | 1.40273    | RAB10        | -0.390599  |
| TMM17A        | 0.0566405  | TULP3           | -0.289728 | NMRAL1                      | 0.346744   | HADHB        | 0.0155594  |
| RNPEP         | 0.0929368  | TEAD4           | 0.440131  | CDIP1                       | 0.923348   | EPT1         | -0.770421  |
| TMEM183A      | 0.0533055  | RAD51AP1        | -0.596618 | FAM100A                     | 1.03386    | C2orf18      | 0.223158   |
| ZBED6,ZC3H11A | -0.411745  | NDUFA9          | 0.328012  | GLYR1                       | -0.131039  | CENPA        | -0.678561  |
| SNRPE         | -0.361146  | CD9             | 0.454285  | NAGPA                       | 0.633348   | TMEM214      | 0.279368   |
| SRGAP2        | -0.718595  | LTBR            | 0.62179   | FAM86A                      | 0.489049   | AGBL5        | -0.0719162 |
| MAPKAPK2      | 0.351743   | NCAPD2          | -1.2207   | CARHSP1                     | -0.122326  | ATRAID       | 0.311635   |
| CD55          | 0.405367   | GAPDH           | 0.174554  | USP7                        | -0.547532  | CAD          | -0.853404  |
| CD46          | -0.962174  | COPS7A          | 0.254634  | EMP2                        | -0.142485  | SNX17        | 0.192024   |
| DTL           | -0.389297  | PTMS            | -0.171485 | DEXI                        | 0.372759   | NRBP1        | 0.11694    |
| PPP2R5A       | -0.572321  | LEPREL2         | 0.228613  | LITAF                       | -0.297888  | ZNF512       | -0.847423  |
| NENF          | 1.17018    | USP5            | 0.032712  | TXNDC11                     | 0.822492   | GPN1         | 0.333442   |
| SMYD2         | -0.0219212 | TP1             | 0.47993   | ZC3H7A                      | -0.960928  | SLC4A1AP     | 0.268319   |
| CENPF         | -1.78395   | ATN1            | -0.156315 | BCAR4,RSL1D1                | 0.146385   | MRPL33       | 0.837896   |
| KCTD3         | -1.0027    | C12orf57,RNU7-1 | 1.24028   | GSPT1                       | -0.0405992 | BRE          | -0.134292  |
| RRP15         | 0.601628   | EMG1            | 0.707156  | PARN                        | 0.100857   | FOSL2        | -0.346255  |
| IARS2         | -0.310402  | PEX5            | 0.230047  | NTAN1                       | 0.275992   | PPP1CB       | -1.50438   |
| MARC1         | -1.26594   | NECAP1          | -0.112059 | RRN3                        | -0.371106  | WDR43        | -0.544593  |
| MIA3          | -0.0468569 | GABARAPL1       | 1.25226   | FOPNL                       | -0.268549  | LBH          | -0.230297  |
| BROX          | -0.620402  | CDKN1B          | -0.895467 | NOMO2                       | -0.657085  | SLC30A6      | -1.02837   |
| CAPN2         | 0.301704   | DDX47           | 0.164229  | RPS15A                      | 0.726012   | YIPF4        | -0.221044  |
| FBXO28        | -0.792692  | GPRC5A,MIR614   | -0.1251   | ARL6IP1                     | -1.04499   | LTBP1        | -1.24019   |
| DEGS1         | -0.674853  | EMP1            | 1.34666   | SMG1                        | -2.19445   | CRIM1        | -1.51163   |
| CNIH4         | -0.0290267 | STRAP           | -0.072298 | GDE1                        | 0.0391917  | LOC100505876 | -0.830262  |

|                             |            |          |            |              |            |                       |            |
|-----------------------------|------------|----------|------------|--------------|------------|-----------------------|------------|
| SRP9                        | -1.15203   | DERA     | -0.0394162 | C16orf88     | -0.400785  | GEMIN6                | 0.469068   |
| EPHX1                       | 0.648771   | MGST1    | -0.0229195 | THUMPD1      | -0.987724  | MORN2                 | 0.339213   |
| H3F3A                       | 0.0814425  | PLEKHA5  | -1.54813   | CDR2         | -0.0752472 | EML4                  | -1.39238   |
| ADCK3                       | 0.151256   | AEBP2    | -1.27212   | GGA2         | -0.0899634 | LOC100130921,MTA<br>3 | -0.275418  |
| SNAP47                      | 0.192071   | PDE3A    | -2.43983   | EARS2        | -0.30285   | EPAS1                 | 0.417379   |
| ARF1                        | 0.475747   | GOLT1B   | -1.02754   | NDUFAB1      | 0.795361   | RHOQ                  | -0.488339  |
| GUK1                        | 0.79105    | CMAS     | -0.0335749 | ARHGAP17     | -0.735699  | CRIP1                 | -0.379644  |
| RNF187                      | 0.511128   | ETNK1    | -0.0171651 | NSMCE1       | 0.115797   | TTC7A                 | -0.7378    |
| RAB4A,SPHAR                 | -0.0795048 | RASSF8   | -1.26909   | GTF3C1       | -0.269996  | BCYRN1                | -1.11953   |
| URB2                        | 0.105497   | FGFR1OP2 | 0.286691   | XPO6         | -0.124815  | MSH2                  | -0.637187  |
| GALNT2                      | -0.905443  | MED21    | -1.01231   | CLN3         | 0.436913   | MSH6                  | -0.765685  |
| COG2                        | -0.0869732 | STK38L   | -1.76054   | NUPR1        | 2.56444    | CHAC2                 | -0.460852  |
| ARV1                        | -0.297771  | PPF1BP1  | -0.608365  | MIR4721,TUFM | 0.466302   | ERLEC1                | 0.165601   |
| GNPAT                       | -0.281487  | MRPS35   | -0.31558   | LOC100289283 | -0.182251  | SPTBN1                | -1.40226   |
| DISC1,TSNAX,TSNA<br>X-DISC1 | -0.22666   | CCDC91   | -0.279016  | CDIPT        | 0.573708   | RPS27A                | 0.757327   |
| NTPCR                       | 0.465279   | DDX11    | 0.402727   | HIRIP3       | 0.243963   | CCDC104               | 0.391196   |
| KCNK1                       | 0.574298   | DNM1L    | -0.929678  | MAPK3        | 0.109391   | C2orf74,KIAA1841      | -0.165347  |
| COA6                        | 0.776722   | PPHLN1   | -0.426297  | CD2BP2       | 0.804584   | COMMD1                | 0.780647   |
| TBCE                        | 0.380384   | ANO6     | -0.937536  | TBC1D10B     | 0.403237   | MDH1                  | -0.0814404 |
| FMN2                        | -1.00768   | TMEM106C | -0.139482  | DCTPP1       | 0.559808   | UGP2                  | -0.361632  |
| EXO1                        | 0.0970886  | PFKM     | -0.557837  | SEPHS2       | 0.93567    | ACTR2                 | -1.25185   |
| DESI2                       | -0.757946  | TUBA1C   | 0.403968   | ZNF768       | 0.607496   | MEIS1                 | -1.31954   |
| SCCPDH                      | 0.00116321 | TROAP    | -0.0739395 | BCL7C        | 0.682163   | PNO1                  | 0.403002   |
| ZNF672                      | 0.0468859  | SPATS2   | -0.242648  | ZNF668       | 0.615085   | ANTXR1                | -0.716917  |
| NOC2L                       | 0.27215    | TMBIM6   | 0.141162   | VKORC1       | 0.55035    | ANXA4                 | -0.491235  |
| C1orf159                    | 0.313059   | SMARCD1  | -0.107245  | C16orf58     | 0.405299   | SNRNP27               | 0.50324    |
| SDF4                        | 0.462246   | COX14    | 0.734835   | SHCBP1       | -0.652562  | PCBP1                 | 0.169873   |
| UBE2J2                      | 0.74459    | LARP4    | -0.975741  | VPS35        | -0.43757   | PCYOX1                | -1.33219   |
| ACAP3                       | 0.171465   | DIP2B    | -1.37183   | C16orf87     | -0.435897  | NAGK                  | 1.22613    |
| CPSF3L                      | 0.347634   | ATF1     | -0.548698  | DNAJA2       | 0.307523   | MPHOSPH10             | -0.367903  |
| DVL1                        | 0.530438   | LETMD1   | 0.633852   | NETO2        | -0.182246  | ZNF638                | -0.186893  |
| AURKAIP1                    | 0.781593   | DAZAP2   | -0.0735861 | ITFG1        | -0.785829  | SPR                   | 0.524184   |
| CCNL2                       | 0.0618495  | NR4A1    | 0.487829   | BRD7         | -0.227113  | SMYD5                 | 0.282279   |
| MRPL20                      | 0.745293   | C12orf44 | 1.2889     | CRNDE        | -0.782757  | CCT7                  | 0.592807   |

|               |            |                           |           |          |           |                         |           |
|---------------|------------|---------------------------|-----------|----------|-----------|-------------------------|-----------|
| SSU72         | 0.664333   | KRT7                      | 0.430383  | AMFR     | 0.227537  | STAMPB                  | -0.225663 |
| CDK11B        | 0.129545   | KRT18                     | 0.361398  | NUDT21   | 0.213267  | DGUOK                   | 0.495554  |
| GNB1,NADK     | -0.284097  | EIF4B                     | -0.633527 | FAM192A  | 0.140754  | MTHFD2                  | 0.437234  |
| C1orf86       | 0.950771   | IGFBP6                    | 1.31441   | CIAPIN1  | 0.369447  | WDR54                   | 0.544792  |
| PEX10         | 0.49411    | MFSD5                     | 0.819546  | KIFC3    | 0.657486  | INO80B,INO80B-WBP1,WBP1 | 0.47501   |
| PANK4         | 0.0835556  | ESPL1                     | -0.771057 | C16orf80 | 0.799827  | HK2                     | -0.416395 |
| MEGF6         | 0.113294   | PFDN5                     | 0.979545  | CSNK2A2  | 0.396886  | POLE4                   | 0.798655  |
| WRAP73        | 0.50301    | C12orf10                  | 1.21901   | CNOT1    | -0.918837 | MRPL19                  | -0.37545  |
| LRRC47        | 0.539972   | SP1                       | -0.751939 | SLC38A7  | 0.801723  | TMSB10                  | 0.706799  |
| CEP104        | -0.505113  | PRR13                     | 0.396886  | GOT2     | 0.0533676 | MAT2A                   | -0.271525 |
| C1orf174      | 0.0900945  | PCBP2                     | -0.102704 | DYNC1LI2 | -0.703013 | RNF181                  | 1.01504   |
| RPL22         | 0.240592   | TARBP2                    | 0.543461  | NAE1     | -0.684784 | USP39                   | 0.0478324 |
| ICMT          | -0.535233  | HOXC10                    | 0.239523  | FAM96B   | 1.06588   | PTCD3                   | -0.562959 |
| ACOT7         | 0.833528   | HNRNPA1                   | -0.271822 | B3GNT9   | 0.4135    | MRPL35                  | 0.660749  |
| KLHL21        | 1.33762    | COPZ1                     | 0.422682  | FHOD1    | 0.292608  | LINC00152               | 1.3381    |
| DNAJC11       | 0.160141   | BLOC1S1,BLOC1S1-RDH5,RDH5 | 0.585571  | ATP6V0D1 | 0.898354  | CIAO1                   | 0.0729189 |
| ENO1          | 0.284888   | ORMDL2                    | 0.205583  | CENPT    | 0.638911  | NCAPH                   | -0.836376 |
| CLSTN1        | 0.0402635  | CDK2                      | -0.286236 | PSMB10   | 0.945331  | COX5B                   | 0.562406  |
| LZIC          | -0.573298  | RAB5B                     | -0.458689 | SLC7A6OS | 0.43249   | UNC50                   | 0.461449  |
| DFFA          | -0.439742  | RPS26                     | 1.14611   | CHTF8    | 0.0709317 | LIPT1,MRPL30            | -0.128407 |
| SRM           | 0.753556   | PA2G4                     | 0.389339  | COG8,PDF | 0.458737  | EIF5B                   | -0.178669 |
| EXOSC10       | -0.132107  | RPL41                     | 0.934858  | NQO1     | 0.761328  | PDCL3                   | 0.549542  |
| MTOR          | -0.263361  | ESYT1,ZC3H10              | -0.35633  | NOB1     | 0.552556  | NPAS2                   | 0.200616  |
| MAD2L2        | 0.737036   | MYL6B                     | 0.704935  | EXOSC6   | 0.283745  | RPL31                   | 0.904752  |
| KIAA2013      | 0.53168    | MYL6                      | 0.506141  | AARS     | 0.573261  | C2orf29                 | -0.341384 |
| EPHA2         | 0.897962   | NABP2                     | 0.409855  | COG4     | 0.0129849 | MAP4K4                  | -0.340476 |
| CROCCP2,NBPF1 | -0.0692756 | LRP1                      | -2.6474   | MTSS1L   | -0.417862 | MRPS9                   | 0.14826   |
| MFAP2         | -0.480157  | SHMT2                     | 0.867686  | VAC14    | 0.359294  | C2orf49                 | 0.469156  |
| ATP13A2       | 0.0619983  | MARS                      | 0.93152   | AP1G1    | -0.995044 | LIMS1                   | -0.805857 |
| SDHB          | 0.527523   | MBD6                      | -0.126572 | GLG1     | -0.556239 | RANBP2                  | -0.413807 |
| RCC2          | -0.185047  | DTX3                      | 0.62919   | RFWD3    | -0.5757   | TTL                     | -0.359453 |
| UBR4          | 0.474486   | OS9                       | 0.631457  | BCAR1    | 0.332389  | CHCHD5                  | 0.828526  |
| EMC1          | -0.455063  | LOC100130776              | 0.40652   | CFDP1    | -0.151375 | SLC20A1                 | 0.414296  |
| AKR7A2        | 0.401205   | TSFM                      | 0.205942  | KARS     | 0.329082  | CBWD2                   | -0.282761 |

|                |            |                 |            |            |                 |                       |            |
|----------------|------------|-----------------|------------|------------|-----------------|-----------------------|------------|
| CAPZB          | -0.125754  | XPOT            | -0.308673  | CMC2       | 0.470165        | ACTR3                 | -0.487051  |
| MUL1           | 0.497308   | TBK1            | -0.669035  | GCSH       | -0.764678       | DDX18                 | -0.582014  |
| DDOST          | 0.327357   | RASSF3          | -0.897592  | MPHOSPH6   | -0.101531       | STEAP3                | -0.496149  |
| HP1BP3         | -1.11747   | MSRB3           | -1.2818    | MBTPS1     | -0.831978       | DBI                   | 0.367719   |
| EIF4G3         | -1.3078    | CAND1           | -1.26216   | COTL1      | 0.487759        | RALB                  | -0.0450417 |
| ECE1           | -0.110648  | RAP1B           | -0.719674  | ZDHHC7     | -<br>0.00755717 | TSN                   | -0.582857  |
| USP48          | -1.07855   | NUP107          | -0.181466  | GIN52      | -<br>0.00682847 | UGGT1                 | -1.04197   |
| HSPG2          | -2.04872   | CPSF6           | -0.295467  | EMC8       | 0.362308        | MZT2B                 | 0.475771   |
| LUZP1          | -0.89605   | YEATS4          | -0.444098  | ZCCHC14    | -0.751914       | IMP4                  | 0.735609   |
| HTR1D          | -0.147388  | CCT2            | 0.181857   | KLHDC4     | 0.368948        | PTPN18                | -0.133864  |
| HNRNPR         | -0.684066  | CNOT2           | -0.507164  | SLC7A5     | -0.679712       | PLEKHB2               | 0.508734   |
| ID3            | -0.5318    | TMEM19          | -1.24472   | CYBA       | 1.13209         | RAB3GAP1              | -0.354775  |
| GALE           | 1.11572    | RAB21           | -0.0231025 | MVD        | 0.987678        | R3HDM1                | -1.40305   |
| SRSF10         | -0.597139  | ATXN7L3B        | -0.330069  | PIEZO1     | -1.01782        | UBXN4                 | -0.696639  |
| RUNX3          | 0.95491    | GLIPR1          | 0.0270958  | APRT       | 0.690195        | KYNU                  | 0.971909   |
| SYF2           | 0.752831   | MRPL42          | -0.504681  | GALNS      | 0.0485836       | GPD2                  | -1.73041   |
| C1orf63        | 0.213276   | METAP2          | -0.187869  | ANKRD11    | 0.793593        | PKP4                  | -1.02826   |
| MIR3917,STMN1  | -0.268919  | SNRPF           | 0.857484   | CHMP1A     | 0.398783        | MARCH7                | -0.761878  |
| GPATCH3,GPN2   | 0.699932   | ELK3            | -0.507382  | FANCA      | -0.393849       | TANK                  | -0.181625  |
| WASF2          | -0.333509  | NEDD1           | -1.44373   | FAM57A     | 0.298982        | PSMD14                | 0.346685   |
| RPA2           | 0.582987   | TMPO            | -1.37972   | TIMM22     | 0.17751         | PPIG                  | -0.387651  |
| DNAJC8         | 0.364166   | SLC25A3         | 0.308273   | PITPNA-AS1 | 0.415938        | SSB                   | -0.287884  |
| SNHG12,SNORA61 | 3.07991    | ACTR6           | -0.727889  | RPA1       | -0.539047       | GORASP2               | 0.14344    |
| TAF12          | 0.553096   | SCYL2           | -1.11921   | DPH1,OVCA2 | 0.667915        | CYBRD1                | -0.899794  |
| SRSF4          | -0.0887925 | UTP20           | -1.22285   | PAFAH1B1   | -0.179035       | DYNC1I2               | -0.100081  |
| MECR           | 0.301656   | CHPT1           | -0.752227  | RAP1GAP2   | -0.217847       | HAT1                  | -0.283457  |
| PUM1           | -0.964363  | DRAM1           | 0.271674   | EMC6       | 1.02819         | DLX1                  | -0.300229  |
| SNRNP40        | 0.180282   | PARBP           | -1.81978   | PSMB6      | 0.692689        | ITGA6                 | -0.268772  |
| FABP3          | 0.586416   | HSP90B1,MIR3652 | 0.593426   | MINK1      | -0.326411       | ZAK                   | -1.44144   |
| PEF1           | 0.272952   | TDG             | -0.937891  | RNF167     | 0.799558        | CDCA7                 | -1.36092   |
| BAI2           | -0.0374628 | TXNRD1          | -0.145313  | ENO3       | -0.467247       | H3F3AP4               | -0.287384  |
| PTP4A2         | -0.233502  | C12orf45        | 0.766291   | KIF1C      | -0.428515       | HOXD9                 | -0.434512  |
| MARCKSL1       | 0.351021   | KIAA1033        | -0.99731   | RABEP1     | -0.625723       | MTX2                  | 0.240347   |
| BSDC1          | 0.725204   | C12orf75        | 0.562089   | RPAIN      | 0.696546        | HNRNPA3,MIR4444-<br>1 | -1.15177   |

|                           |           |          |            |                                         |           |                           |            |
|---------------------------|-----------|----------|------------|-----------------------------------------|-----------|---------------------------|------------|
| ZBTB8OS                   | 0.739808  | C12orf23 | -0.922786  | MIS12                                   | 0.225185  | AGPS                      | -1.28301   |
| SYNC                      | -1.0049   | PWP1     | -0.189739  | FAM64A                                  | -0.230196 | UBE2E3                    | -0.611629  |
| YARS                      | 0.675802  | ISCU     | 0.433854   | TXNDC17                                 | 0.423561  | SSFA2                     | -1.13382   |
| TMEM54                    | 0.859021  | UNG      | -0.330319  | C17orf49,RNASEK<br>,RNASEK-<br>C17orf49 | 1.06576   | DNAJC10                   | -0.337132  |
| AK2                       | 0.368369  | UBE3B    | -0.303902  | ACADVL                                  | 0.567216  | NUP35                     | -0.0211307 |
| MIR3605,PHC2              | 0.836063  | MVK      | -0.801057  | ELP5                                    | 0.75317   | ZC3H15                    | -0.267457  |
| LOC100996496,SFP<br>Q     | -0.449134 | IFT81    | -1.91481   | EIF5A                                   | 0.286541  | ITGAV                     | -2.01475   |
| KIAA0319L                 | -0.011132 | ATP2A2   | -0.700383  | POLR2A                                  | -0.766608 | GULP1                     | -1.29293   |
| PSMB2                     | 0.437699  | FAM216A  | 0.363077   | EIF4A1,SENPA3,SE<br>NP3-EIF4A1          | 0.400762  | COL3A1,MIR3606            | -1.74313   |
| CLSPN                     | -1.34696  | ALDH2    | 0.739994   | MPDU1                                   | 0.640548  | WDR75                     | -0.2214    |
| TRAPPC3                   | 0.808332  | MAPKAPK5 | 0.358395   | WRAP53                                  | 0.0772932 | ASNSD1                    | -0.32073   |
| LSM10                     | 0.700521  | ERP29    | 0.54307    | CHD3                                    | -0.895904 | INPP1                     | 1.1412     |
| MRPS15                    | 0.772767  | TRAFD1   | -0.294486  | CNTROB                                  | 0.284706  | NAB1                      | -0.881581  |
| GNL2                      | 1.00097   | PTPN11   | -1.26674   | PFAS                                    | -0.662895 | GLS                       | -0.916841  |
| C1orf109                  | 0.74001   | C12orf52 | 0.255453   | RANGRF                                  | 0.785452  | MYO1B                     | -0.193107  |
| YRDC                      | 1.11734   | TPCN1    | -0.445295  | NDEL1                                   | 0.363345  | SLC39A10                  | -2.58214   |
| SF3A3                     | 0.117797  | PLBD2    | -0.448593  | GLP2R                                   | -1.10361  | COQ10B                    | 0.104347   |
| FHL3                      | 0.278202  | RFC5     | -0.214281  | MYOCD                                   | -2.7404   | HSPE1,HSPE1-<br>MOB4,MOB4 | 0.574099   |
| RRAGC                     | 0.689722  | PEBP1    | -0.0723239 | UBB                                     | 0.640643  | C2orf47                   | 0.191719   |
| GJA9,GJA9-<br>MYCBP,MYCBP | -0.656426 | HSPB8    | 1.04498    | C17orf76-<br>AS1,SNORD49B               | 0.748116  | SPATS2L                   | 0.171523   |
| PABPC4                    | 0.443582  | COX6A1   | 1.05376    | MPRIP                                   | -0.519366 | SGOL2                     | -1.76575   |
| TRIT1                     | 0.0490229 | GATC     | -0.137922  | RAI1                                    | -0.885286 | BZW1                      | -0.568638  |
| PPT1                      | 0.030346  | DYNLL1   | 0.378039   | DRG2                                    | 0.495773  | NIF3L1                    | 0.160531   |
| CITED4                    | 2.33442   | RNF10    | 0.245676   | ALKBH5                                  | 0.167262  | NDUFB3                    | 0.729212   |
| SCMH1                     | -0.170052 | MLEC     | 0.19413    | TRIM16L                                 | 0.625767  | CASP8                     | 0.137587   |
| FOXJ3                     | -0.840687 | RNF34    | -0.0278022 | FAM18B1                                 | 0.126158  | NOP58                     | 0.496458   |
| LEPRE1                    | 0.218039  | ORAI1    | 1.2681     | PRPSAP2                                 | 0.153594  | ABI2                      | -0.852339  |
| SLC2A1                    | 0.215556  | PSMD9    | 0.646302   | ALDH3A2                                 | -0.454468 | EEF1B2                    | 0.679499   |
| EBNA1BP2                  | 0.66036   | KNTC1    | -1.08504   | SPECC1                                  | -0.640581 | RPE                       | -0.856165  |
| ELOVL1                    | 0.543198  | DENR     | -0.621146  | MAP2K3                                  | 1.06987   | CPS1                      | -2.20874   |
| MED8                      | 0.69872   | ARL6IP4  | 0.489244   | WSB1                                    | -0.382365 | ATIC                      | 0.029371   |
| HYI                       | 1.02916   | SETD8    | 0.336506   | TMEM97                                  | -0.168999 | XRCC5                     | -0.232925  |

|                 |            |                               |           |               |            |                       |             |
|-----------------|------------|-------------------------------|-----------|---------------|------------|-----------------------|-------------|
| SLC6A9          | 0.94519    | TMED2                         | -0.214547 | TNFAIP1       | 0.277939   | RPL37A                | 0.996523    |
| ERI3            | 0.138661   | DDX55                         | 0.114191  | TMEM199       | 0.55934    | ARPC2                 | 0.305036    |
| EIF2B3          | 0.355621   | GTF2H3                        | -0.651302 | SUPT6H        | -0.26802   | PNKD                  | 0.381392    |
| HECTD3          | -0.0126611 | FAM101A,ZNF664,ZNF664-FAM101A | -1.19436  | RPL23A        | 0.652782   | CTDSP1                | -0.00394441 |
| PRDX1           | 0.224676   | AACS                          | 0.0916536 | TRAF4         | 0.690976   | RQCD1                 | -0.143138   |
| GPBP1L1         | -0.0102204 | RAN                           | 0.203923  | ERAL1         | 0.32831    | BCS1L                 | 0.602713    |
| POMGNT1         | 0.540548   | SFSWAP                        | 0.269677  | CPD           | -1.60371   | FAM134A               | 0.268537    |
| LRRC41          | -0.0690173 | MMP17                         | 0.307447  | SUZ12         | -1.54623   | ZFAND2B               | 0.511679    |
| ATPAF1,KIAA0494 | -0.278273  | ULK1                          | -0.272166 | RHOT1         | -1.25074   | DNAJB2                | 1.62854     |
| STIL            | -1.20979   | PUS1                          | 0.831169  | MIR632,ZNF207 | -0.18505   | GMPPA                 | 0.885939    |
| FAF1            | 0.163097   | NOC4L                         | 0.598297  | PSMD11        | -0.266691  | ACSL3                 | -0.953863   |
| MIR761,NRD1     | -0.648301  | FBRSL1                        | 0.192475  | AP2B1         | -0.759687  | MRPL44                | 0.266226    |
| KTI12,TXNDC12   | 0.158565   | PXMP2                         | 0.136145  | TAF15         | -0.686224  | MFF                   | 0.0450968   |
| ORC1            | -0.234708  | PGAM5                         | 0.0889963 | ZNHIT3        | 0.740996   | AGFG1,MIR5703         | -0.21698    |
| SELRC1          | -0.21356   | NINJ2                         | 0.0376376 | PIGW          | -0.0854849 | SP100                 | 0.277004    |
| C1orf123        | 0.694442   | FOXM1                         | -0.352016 | GGNBP2        | -0.146501  | CAB39                 | -0.592011   |
| MAGOH           | 0.695371   | TNFRSF1A                      | -0.030939 | AATF          | 0.915613   | ITM2C                 | 0.117558    |
| LRP8            | -0.362937  | MRPL51                        | 0.515357  | DUSP14        | 0.594739   | PSMD1                 | -0.0662229  |
| TMEM48          | -1.26535   | LOC100996356                  | 0.619483  | MRPL45        | 0.265433   | ARMC9                 | 0.099555    |
| YIPF1           | 0.409657   | NOP2                          | 0.627855  | ARHGAP23      | -0.573951  | LOC100996253          | 0.528103    |
| HSPB11          | 0.257591   | CHD4                          | 0.0658832 | MLLT6         | -0.727876  | MIR1244-1,PTMA        | -0.310547   |
| TMEM59          | -0.14632   | ZNF384                        | 0.738418  | CISD3         | 0.456966   | COPSTB                | 0.101001    |
| SSBP3           | -1.46809   | MLF2                          | 0.343252  | PSMB3         | 0.954764   | ALPP                  | -2.54646    |
| DHCR24          | -1.05646   | CDCA3                         | -0.253809 | LASP1         | -0.312461  | EIF4E2                | 0.575525    |
| USP24           | -1.18576   | PHB2                          | 0.580843  | RPL19         | 0.845305   | ATG16L1               | -0.076211   |
| MYSM1,TACSTD2   | 0.49998    | LPCAT3                        | -0.73444  | CDK12         | -0.572006  | DGKD                  | 0.0747246   |
| JUN             | 1.68256    | MFAP5                         | -0.250978 | ERBB2         | -0.663565  | SH3BP4                | -0.518136   |
| TM2D1           | 0.467832   | M6PR                          | 0.54908   | PSMD3         | 0.405918   | AGAP1                 | -0.802645   |
| ITGB3BP         | -0.585877  | KLRAP1,MAGOHB                 | 0.47324   | THRA          | -1.38561   | CXCR7                 | -1.09896    |
| JAK1            | -0.651293  | CSDA                          | 0.554129  | MSL1          | -0.224452  | COPS8                 | 0.161497    |
| SERBP1          | -0.153428  | HEBP1                         | 0.64166   | CASC3         | -0.424861  | LRRFIP1               | -0.65028    |
| GNG12           | -1.12317   | WBP11                         | 0.0686011 | CDC6          | 0.348005   | RAMP1                 | 0.707066    |
| WLS             | 0.308327   | EPS8                          | -0.214697 | IGFBP4        | 0.307989   | SCLY,UBE2F,UBE2F-SCLY | 0.299273    |
| DEPDC1          | -2.13931   | RECQL                         | -0.420525 | TMEM99        | 0.459455   | ASB1,TRAF3IP1         | 0.0768105   |

|                         |            |              |            |                      |            |             |            |
|-------------------------|------------|--------------|------------|----------------------|------------|-------------|------------|
| LRRRC40                 | -1.15299   | LDHB         | 0.165068   | EIF1                 | 1.51926    | TWIST2      | -0.185226  |
| ANKRD13C                | 0.11938    | KIAA0528     | -1.52508   | FKBP10               | 0.218041   | GPC1        | -0.0141281 |
| ZRANB2                  | -0.859471  | BCAT1        | -1.68328   | CNP                  | -0.0701614 | RNPEPL1     | 0.31394    |
| CRYZ                    | -0.685488  | KRAS         | -1.52882   | NKIRAS2              | 0.320354   | PPP1R7      | 0.501545   |
| PIGK                    | -0.732362  | ASUN         | -0.0772831 | ATP6V0A1,MIR50<br>10 | 0.429642   | SEPT2       | -0.822273  |
| ZZZ3                    | -0.604003  | TM7SF3       | -0.440397  | NAGLU                | 0.0545123  | BOK         | 0.171945   |
| USP33                   | -1.35033   | ERGIC2       | -0.694117  | COASY                | 0.394162   | ATG4B       | 0.762262   |
| FUBP1                   | -0.239174  | TMTC1        | -0.632841  | MLX                  | 0.129085   | TMEM18      | 0.506921   |
| GNG5                    | 0.450588   | IPO8         | -1.24507   | TUBG1                | 0.413048   | PXDN        | -1.12026   |
| C1orf52                 | 0.558029   | FAM60A       | -0.636942  | VPS25                | 0.917141   | TSSC1       | 0.41747    |
| DDAH1                   | -1.15159   | YARS2        | 0.22454    | PSME3                | 0.0481621  | ADI1        | 0.292668   |
| SEP15                   | -0.339678  | CPNE8        | -0.674561  | RPL27                | 0.694271   | RNASEH1     | 0.122325   |
| GTF2B                   | 0.709939   | ZCRB1        | 0.0722472  | NBR1                 | -0.31511   | ITGB1BP1    | 0.572304   |
| LOC100996620.ZNF<br>644 | -1.04171   | TWF1         | -1.0124    | DHX8                 | -0.390523  | ADAM17      | -0.456855  |
| FAM69A                  | -1.7913    | SCAF11       | -1.22986   | G6PC3                | 0.392714   | YWHAQ       | -0.719387  |
| TMED5                   | -0.735653  | SLC38A1      | -0.490625  | TMUB2                | 0.680552   | ODC1        | 0.830925   |
| BCAR3                   | 0.937997   | SLC38A2      | -1.12184   | GRN                  | 0.631126   | NOL10       | -0.223048  |
| DNTTIP2                 | 0.598509   | AMIGO2       | 0.73179    | FZD2                 | -0.682393  | PDIA6       | 0.426836   |
| GCLM                    | 0.467774   | HDAC7        | -0.0202552 | NMT1                 | 0.240771   | ROCK2       | -1.77834   |
| ARHGAP29                | -1.22351   | KANSL2       | 0.66208    | HEXIM1               | -0.0687519 | TTC32,WDR35 | 0.125196   |
| F3                      | 1.17567    | DDX23        | -0.146914  | FMNL1                | 0.144596   | LAPTM4A     | -0.560169  |
| CNN3                    | -0.0698848 | FKBP11       | 1.20254    | NSF                  | -0.478545  | SDC1        | 0.313651   |
| ALG14                   | 0.251541   | ARF3         | -0.261271  | GOSR2                | 0.577704   | PUM2        | -1.03343   |
| DPYD                    | -1.82146   | PRKAG1       | 0.413587   | NPEPPS               | -0.532874  | SF3B14      | 0.51678    |
| EXTL2                   | -1.18293   | TUBA1B       | -0.0115962 | KPNB1                | -0.746207  | TP53I3      | 0.916154   |
| DPH5                    | 0.275279   | TUBA1A       | -0.434998  | PNPO                 | -0.130054  | PTRHD1      | 0.672154   |
| SLC25A24                | -1.00479   | MCRS1        | 0.419286   | CDK5RAP3             | 0.827575   | ADCY3       | 0.181745   |
| HENMT1                  | 0.304979   | RACGAP1      | -0.886362  | NFE2L1               | 0.242785   | HADHA       | 0.349807   |
| CLCC1                   | -0.563895  | CERS5        | 0.615347   | CALCOCO2             | 0.233013   | OST4        | 0.61765    |
| TAF13                   | 0.399563   | LIMA1        | -0.609745  | ATP5G1               | 0.554473   | CGREF1      | 0.219043   |
| PSRC1                   | -0.339423  | CSRNP2,TFCP2 | -0.495653  | UBE2Z                | 0.135578   | PREB        | 0.548566   |
| PSMA5                   | 0.900758   | KRT80        | 0.158813   | IGF2BP1              | -0.396906  | SLC5A6      | 0.470652   |
| GSTM3                   | 0.29544    | KRT8         | -0.412021  | KAT7                 | -0.141025  | MPV17       | 0.375      |
| LAMTOR5                 | 0.518274   | SPRYD3       | 0.316841   | ITGA3                | 0.147023   | GTF3C2      | -0.343034  |

|                     |            |                |                 |                         |            |          |            |
|---------------------|------------|----------------|-----------------|-------------------------|------------|----------|------------|
| LRIF1               | 0.310297   | RARG           | 0.0732679       | ABCC3                   | -0.628477  | EIF2B4   | 0.455119   |
| DRAM2               | -0.372527  | AAAS           | 0.464664        | LUC7L3                  | -0.0794609 | PPM1G    | 0.404734   |
| WDR77               | 0.270468   | ATF7           | -0.0868298      | NME1,NME1-<br>NME2,NME2 | 0.749855   | SUP7L    | 0.550277   |
| RHOC                | 0.901214   | ATP5G2         | 0.506901        | UTP18                   | 0.00989079 | MEMO1    | -0.117683  |
| SLC16A1             | -0.725033  | SMUG1          | 0.588055        | SCPEP1                  | 0.292021   | DPY30    | 0.0814586  |
| PHTF1               | -0.388549  | CBX5,MIR3198-2 | -1.33854        | AKAP1                   | -0.304931  | FAM98A   | -0.735017  |
| BCAS2               | 0.188101   | ITGA5          | 0.367804        | MSI2                    | -1.1435    | FEZ2     | -0.613366  |
| CSDE1,NRAS          | -0.641988  | CD63           | 1.18973         | DYNLL2                  | -0.261978  | CEBPZ    | -0.096855  |
| SIKE1               | 0.672481   | SARNP          | 0.328594        | RAD51C                  | 0.416373   | PRKD3    | -1.22429   |
| CD58                | -0.570587  | DNAJC14        | -<br>0.00356758 | PRR11                   | -1.17693   | CDC42EP3 | -0.142323  |
| IGSF3               | -1.54853   | WIBG           | 0.789684        | DHX40                   | -0.461444  | CYP1B1   | -1.10733   |
| WARS2               | -0.821314  | SMARCC2        | -0.776619       | CLTC                    | -0.84243   | ATL2     | -1.05129   |
| NOTCH2              | -1.89894   | ANKRD52        | -0.942806       | MIR21,VMP1              | -0.182074  | HNRPLL   | -0.672093  |
| POLR3C              | 0.762996   | CS             | -0.33149        | MRC2                    | -0.626409  | SRSF7    | 0.109756   |
| SF3B4               | 0.682641   | CNPY2,PAN2     | 0.760753        | DCAF7                   | -0.371332  | COX7A2L  | 0.651896   |
| ANP32E              | -1.5764    | TIMELESS       | -0.593509       | TACO1                   | 0.637961   | ZFP36L2  | 0.429585   |
| APH1A               | 0.216358   | BAZZA          | -0.852416       | DDX42                   | -0.17793   | LRPPRC   | -0.811933  |
| MCL1                | -0.0443302 | ATP5B          | 0.102024        | PSMC5                   | 0.565873   | PREPL    | -1.14263   |
| ENSA                | -0.022169  | PTGES3         | -0.858623       | PRKCA                   | -1.26473   | SIX2     | 0.129849   |
| GOLPH3L,HORMAD<br>1 | -0.61088   | NACA           | 0.610248        | PITPNC1                 | 0.0716565  | PIGF     | -0.596808  |
| ARNT                | -0.881166  | TMEM194A       | -0.359099       | NOL11                   | -0.514719  | MCFD2    | -0.102341  |
| CERS2               | 0.52362    | STAT6          | -0.0783021      | KPNA2                   | -0.192434  | CALM2    | -0.237758  |
| CDC42SE1            | 0.172253   | DCTN2          | 0.36689         | AMZ2                    | 0.351653   | FBXO11   | -1.08237   |
| VPS72               | 0.703072   | B4GALNT1       | -0.21197        | PRKAR1A                 | -1.18317   | PSME4    | -0.908725  |
| PI4KB               | 0.212435   | CDK4           | 0.466766        | RPL38                   | 0.991682   | RTN4     | -0.409109  |
| RFX5                | -0.721081  | METTL1         | 0.613504        | MIR3615,SLC9A3<br>R1    | -0.4829    | MTIF2    | -0.0477122 |
| SELENBP1            | -0.586572  | CTDSP2         | -0.51701        | CDR2L                   | 0.498529   | SMEK2    | -0.807666  |
| MRPL9               | 0.601191   | GNS            | -0.642668       | ICT1                    | 0.728412   | PNPT1    | -0.711654  |
| S100A10             | 1.0868     | LLPH           | 0.476275        | NUP85                   | 0.246122   | EFEMP1   | -0.994512  |
| S100A11             | 1.21748    | TMBIM4         | -0.500626       | MRPS7                   | 0.481245   | FANCL    | -0.763779  |
| S100A6              | 1.02314    | KRR1           | -0.450015       | SAP30BP                 | 0.764476   | USP34    | -0.975364  |
| S100A4              | 0.137413   | NAP1L1         | 0.0300679       | UNK                     | -0.299972  | XPO1     | -1.56885   |
| S100A2              | 0.726625   | BBS10,OSBPL8   | -1.56625        | CDK3,TEN1,TEN1          | 0.900452   | CCT4     | 0.195777   |



|              |            |                |            |                       |            |                               |            |
|--------------|------------|----------------|------------|-----------------------|------------|-------------------------------|------------|
|              |            |                |            | -CDK3                 |            |                               |            |
| S100A16      | 0.894109   | CSRP2          | 0.0556356  | FAM100B               | 1.08645    | RAB1A                         | -0.279442  |
| S100A13      | 1.21542    | E2F7           | -0.830599  | SPHK1                 | 0.902908   | SPRED2                        | 0.518518   |
| ILF2         | 0.596938   | PAWR           | -0.164808  | SNHG16                | 0.86321    | C1D                           | 0.197682   |
| DENND4B      | -0.0441754 | PPP1R12A       | -1.84753   | METTL23               | 0.25741    | WDR92                         | -0.622877  |
| CRTC2        | 0.978999   | CCDC59         | 0.331572   | MFSD11                | -0.50534   | PPP3R1                        | -0.599417  |
| SLC39A1      | 0.908223   | ATP2B1         | -0.568258  | LINC00338,SEC14<br>L1 | -0.342211  | NFU1                          | 0.381159   |
| JTB          | 0.441403   | LUM            | -1.33166   | SEPT9                 | -0.123678  | SNRPG                         | 0.63644    |
| RAB13        | 0.43732    | DCN            | -1.14531   | SYNGR2                | 0.334874   | FAM136A                       | 0.402042   |
| TPM3         | 0.0747556  | BTG1,LOC256021 | 0.855331   | AFMID                 | -0.116483  | TEX261                        | 0.0420505  |
| C1orf43      | 0.485544   | UBE2N          | -0.203181  | BIRC5                 | -0.195599  | PRADC1                        | 0.467311   |
| UBE2Q1       | 0.508716   | NDUFA12        | 0.633241   | CBX2                  | -0.393343  | TPRKB                         | 0.191212   |
| ADAR         | -0.724116  | NTN4           | 0.216049   | GAA                   | -0.0489676 | DUSP11                        | 0.300152   |
| PMVK         | 0.71402    | LTA4H          | 0.11763    | RPTOR                 | -0.150987  | BOLA3                         | 0.436319   |
| PYGO2        | -0.282183  | IKBIP          | -0.689733  | BAIAP2                | 0.560188   | MOB1A                         | -0.742908  |
| SHC1         | 0.0242553  | ARL1           | 0.131949   | C17orf89              | 0.256204   | DCTN1                         | -0.26739   |
| DPM3         | 0.0587517  | GNPTAB         | -1.29363   | CCDC137               | 0.978502   | MOGS                          | 0.426195   |
| KRTCAP2      | 0.918197   | NUP37          | 0.290323   | HGS                   | 0.699679   | CCDC142,MRPL53                | 0.85069    |
| MUC1         | -0.695855  | GLT8D2         | -0.942142  | MRPL12                | 0.65066    | PCGF1                         | 0.757776   |
| GBA          | 0.0503077  | NUAK1          | -0.375353  | SLC25A10              | -0.297628  | AUP1                          | 1.33122    |
| FAM189B      | 0.223918   | CKAP4          | 0.018267   | ANAPC11               | 0.313246   | SUCLG1                        | 0.303033   |
| SCAMP3       | 0.819262   | CRY1           | -0.0731961 | RAC3                  | 0.353332   | TRABD2A                       | -1.40911   |
| ASH1L,MIR555 | -0.917587  | SART3          | -0.357719  | GPS1                  | 0.338926   | TGOLN2                        | -0.791329  |
| YY1AP1       | 0.28855    | CORO1C         | 0.0384657  | SLC16A3               | 0.0079441  | CAPG                          | 0.858259   |
| KIAA0907     | 0.0961014  | ALKBH2         | 0.734646   | NARF                  | 0.408163   | LOC90784,POLR1A               | -1.11201   |
| ARHGEF2      | 0.894144   | KCTD10         | -0.437199  | FOXK2                 | -0.137152  | IMMT                          | -0.0231208 |
| SSR2         | 1.10953    | GLTP           | 0.203405   | FN3KRP                | 0.23246    | CHMP3,RNF103,RN<br>F103-CHMP3 | -0.362392  |
| UBQLN4       | -0.0136739 | ANAPC7         | -0.317002  | TBCD                  | -0.637144  | MRPS5                         | 0.222354   |
| SMG5         | 0.643123   | ARPC3          | 0.286957   | METRNL                | 0.873331   | STARD7                        | -0.457843  |
| C1orf85      | 0.389909   | GPN3           | -0.475257  | FAM101B               | -0.918827  | TMEM127                       | -0.0659285 |
| CCT3         | 0.262194   | VPS29          | -0.152421  | GEMIN4                | -0.130102  | SNRNP200                      | -0.692135  |
| MEF2D        | 0.202643   | PPP1CC         | -0.990439  | GLOD4                 | 0.357302   | LMAN2L                        | 0.161193   |
| IQGAP3       | 0.411932   | ATXN2          | -1.1443    | NXN                   | -0.508189  | ANKRD39                       | 0.889055   |
| GPATCH4      | 0.349388   | NAA25          | -1.0593    | ABR                   | 0.954276   | ACTR1B                        | -0.135989  |

|              |                 |               |            |                                     |            |                          |            |
|--------------|-----------------|---------------|------------|-------------------------------------|------------|--------------------------|------------|
| CRABP2       | -0.258364       | RPL6          | 0.475136   | YWHAE                               | -0.160105  | MITD1                    | 0.394372   |
| ISG20L2      | 0.140942        | DDX54         | 0.0851472  | CRK                                 | -0.372611  | TXNDC9                   | 0.26341    |
| MRPL24       | 0.671478        | C12orf49      | -0.47915   | MYO1C                               | -0.48958   | RNF149,SNORD89           | 0.259952   |
| HDGF         | -0.244248       | FBXO21        | -0.697192  | PITPNA                              | 0.179148   | FHL2                     | -0.303688  |
| TAGLN2       | 0.239325        | WSB2          | 0.269514   | PRPF8                               | -1.01487   | UXS1                     | -0.132587  |
| DCAF8        | -<br>0.00808712 | RAB35         | 0.432373   | TSR1                                | 0.0184806  | SEPT10                   | -0.487803  |
| PEX19        | -0.135561       | GCN1L1        | -0.759964  | KIAA0664                            | -0.0627509 | BUB1                     | -1.04235   |
| COPA         | -0.177363       | RPLP0         | 0.775943   | P2RX5,P2RX5-<br>TAX1BP3,TAX1BP<br>3 | 0.438738   | LOC541471                | 1.33404    |
| USF1         | 0.391543        | PXN           | 0.317451   | ITGAE                               | 0.485635   | ANAPC1                   | -1.05721   |
| PFDN2        | 1.03682         | TRIAP1        | 0.190759   | C17orf85                            | -0.416742  | CKAP2L                   | -0.829652  |
| DEDD         | 0.145645        | SRSF9         | 0.164807   | ANKFY1                              | -1.07453   | LOC100506748,SLC<br>35F5 | -0.97075   |
| B4GALT3      | 0.417877        | COQ5          | -0.0380604 | UBE2G1                              | -0.978456  | CLASP1                   | -1.00157   |
| ALDH9A1      | -<br>0.00388269 | POP5          | 0.583628   | MYBBP1A                             | -0.0316155 | MKI67IP                  | 0.0854859  |
| TMCO1        | 0.406254        | CAMKK2        | -0.526441  | PELP1                               | 0.366134   | BIN1                     | 0.0199838  |
| CREG1        | 0.34285         | ANAPC5        | -0.153889  | SLC25A11                            | 0.305204   | ERCC3                    | 0.276516   |
| MPC2         | 0.319968        | RHOF          | 0.369841   | PFN1                                | 0.598367   | IWS1                     | 0.285884   |
| NME7         | 0.241116        | HPD           | -1.13202   | SPAG7                               | 0.13401    | LIMS2                    | -0.0729476 |
| PIGC         | 0.156478        | DIABLO,VPS33A | 0.343285   | NUP88                               | 0.24233    | WDR33                    | -0.395337  |
| CENPL        | -0.534564       | CLIP1         | -1.03145   | C1QBP                               | 0.522312   | POLR2D                   | 0.333554   |
| GASS,SNORD80 | 1.83822         | RSRC2         | 0.384936   | DHX33                               | -0.683098  | AMMECR1L                 | -0.160356  |
| MRPS14       | -0.104109       | VPS37B        | 0.417817   | DERL2                               | 0.611402   | SMPD4                    | -0.257082  |
| KIAA0040     | -0.919057       | CDK2AP1       | -0.876095  | DVL2                                | -0.0276657 | FAM168B                  | -0.470556  |
| RFWD2        | 0.00738211      | SBN01         | -1.08538   | PHF23                               | 0.498006   | MZT2A                    | 0.257609   |
| TOR1AIP2     | -0.165728       | EIF2B1        | 0.279599   | GABARAP                             | 0.436425   | MCM6                     | -1.13694   |
| ACBD6        | 0.341119        | NCOR2         | -0.218691  | CTDNEP1                             | 0.440243   | DARS                     | -0.387278  |
| STX6         | -0.157343       | SCARB1        | -0.276606  | GPS2                                | 0.327419   | CXCR4                    | 0.105412   |
| GLUL         | -0.902975       | UBC           | 1.36011    | C17orf61,C17orf61<br>-PLSCR3,PLSCR3 | 0.239464   | ORC4                     | -0.861093  |
| ARPC5        | -0.638102       | DHX37         | -0.0970154 | ZBTB4                               | -0.460189  | MMADHC                   | 0.176006   |
| IVNS1ABP     | -0.7417         | SLC15A4       | -0.257837  | FXR2                                | 0.664817   | RND3                     | 1.16858    |
| TPR          | -0.686734       | STX2          | -0.615729  | TP53                                | -0.798934  | ARL5A                    | -1.11401   |
| UCHL5        | -0.630025       | POLE          | 0.643225   | LSMD1                               | 0.722676   | PRPF40A                  | -0.816224  |
| GLRX2        | 0.163043        | ANKLE2        | -0.30715   | TRAPPC1                             | 0.549566   | FAP                      | -0.312924  |

|                |           |          |             |            |            |               |            |
|----------------|-----------|----------|-------------|------------|------------|---------------|------------|
| ASPM           | -1.89258  | GOLGA3   | -0.448847   | VAMP2      | 0.734593   | GALNT3        | -0.282796  |
| ZNF281         | -1.03198  | SAP18    | 0.729545    | AURKB      | 0.562554   | STK39         | -0.444961  |
| KIF14          | -2.27431  | MRP63    | 0.354976    | RPL26      | 0.944162   | SPC25         | -0.714728  |
| TMEM9          | 0.2224    | NUPL1    | -0.900914   | STX8       | 0.203383   | METTL5        | -0.416615  |
| PHLDA3         | 0.789825  | RPL21    | 0.728671    | SCO1       | 0.0310146  | TLK1          | -1.30029   |
| CSRP1          | 0.391952  | GTF3A    | 0.157471    | ELAC2      | 0.175328   | SP3           | -1.18394   |
| UBE2T          | 0.351816  | POLR1D   | 0.874504    | PMP22      | -0.0703145 | OLA1          | -0.0677938 |
| ADIPOR1,CYB5R1 | 0.441449  | POMP     | 0.468168    | TRIM16     | 0.650101   | WIPF1         | -1.43238   |
| PPP1R15B       | -0.60299  | RFC3     | -0.646192   | NCOR1      | -1.31254   | CHN1          | -0.622965  |
| PIK3C2B        | -1.71952  | EXOSC8   | 0.632663    | CENPV      | 0.624517   | ATF2          | -0.539922  |
| RBBP5          | -1.02976  | UFM1     | 0.155649    | COPS3      | 0.305328   | ATP5G3        | 0.200418   |
| NUCKS1         | -1.7407   | RGCC     | -0.95359    | PEMT       | 0.285832   | LOC375295     | -1.2543    |
| SLC41A1        | 0.535872  | DNAJC15  | -0.0495639  | SREBF1     | -1.12502   | NFE2L2        | -0.131676  |
| EIF2D          | 0.200514  | GTF2F2   | 0.35014     | FLII       | -0.0680053 | PRKRA         | -0.0779629 |
| SLC30A1        | -0.366795 | NUDT15   | -0.5459     | SHMT1      | -0.125791  | NCKAP1        | -1.5533    |
| NEK2           | -0.62343  | ITM2B    | -0.442828   | B9D1       | -0.521842  | TFP1          | -0.59327   |
| LPGAT1         | -1.90716  | RB1      | -1.6659     | ALDH3A1    | 0.326804   | ORMDL1        | 0.571772   |
| INTS7          | -0.145939 | FNDC3A   | -1.68623    | USP22      | -0.652661  | HIBCH         | -0.250723  |
| RPL21P28       | 1.13668   | DLEU1    | 0.421101    | TMEM11     | 0.856751   | STAT1         | -0.724874  |
| TMEM206        | 0.908785  | RNASEH2B | 0.126494    | IFT20      | 0.730551   | GTF3C3        | -0.16373   |
| BATF3          | 1.53405   | CKAP2    | -1.20134    | POLDIP2    | 0.379211   | SF3B1         | -0.84489   |
| PTPN14         | -1.69334  | SUGT1    | -0.00367503 | PIGS       | -0.3818    | HSPD1         | -0.0884894 |
| EPRS           | -0.140664 | KLF5     | -0.232688   | SPAG5      | -0.415214  | CLK1          | 0.856079   |
| BPNT1          | 0.128403  | UCHL3    | 0.496722    | KIAA0100   | -0.77484   | PPIL3         | 0.464223   |
| RAB3GAP2       | -0.989532 | LMO7     | -0.67648    | SDF2       | 0.891114   | ORC2          | -0.884258  |
| AIDA           | -0.609384 | CLN5     | -0.085181   | NARR,RAB34 | 0.377731   | TRAK2         | -0.621535  |
| TP53BP2        | -0.106114 | NDFIP2   | -0.884161   | TLCD1      | 0.158166   | TMEM237       | -0.334985  |
| NVL            | 0.079955  | SLITRK5  | -1.66294    | FLOT2      | 0.186113   | SUMO1         | -0.0938706 |
| WDR26          | -0.420271 | GPC5     | -1.59827    | NUFIP2     | -0.808116  | WDR12         | 0.192471   |
| LBR            | -1.79655  | DNAJC3   | 0.296571    | GIT1       | 0.147945   | GCSHP3,NDUFS1 | -0.308096  |
| ENAH           | -1.40012  | MBNL2    | -1.20315    | BLMH       | 0.0433309  | IDH1          | -0.0596498 |
| PYCR2          | 0.611406  | RAP2A    | -1.49568    | COPRS      | 1.11578    | LANCL1        | -2.16532   |
| ACBD3          | -0.585884 | IPO5     | -0.185412   | UTP6       | 0.168676   | FN1           | -1.38815   |
| LIN9           | -1.09959  | FARP1    | -0.913724   | NLE1       | 0.208584   | AAMP          | 0.663599   |
| PARP1          | -0.523081 | UBAC2    | 0.0760799   | MYO19      | 0.246684   | TMBIM1        | 1.51688    |

|           |            |                           |           |                                       |            |                  |            |
|-----------|------------|---------------------------|-----------|---------------------------------------|------------|------------------|------------|
| CDC42BPA  | -1.01263   | TM9SF2                    | -0.72573  | ACACA                                 | -1.11363   | RNF25            | 1.1559     |
| JMJD4     | 0.433377   | TPP2                      | -0.740495 | DDX52                                 | -0.450434  | NHEJ1            | -0.0509859 |
| C1orf35   | 0.345866   | BIVM,BIVM-<br>ERCC5,ERCC5 | -0.500719 | PCGF2                                 | 0.559819   | CNPPD1           | 0.788899   |
| MRPL55    | 0.977215   | COL4A2                    | -0.595334 | PIP4K2B                               | -0.404822  | ABCB6            | 0.460891   |
| TRIM11    | 1.28803    | CARKD                     | 0.802327  | RPL23                                 | 0.648791   | ATG9A            | -0.382309  |
| NUP133    | -0.574794  | ING1                      | 0.485571  | MED1                                  | -1.09665   | TUBA4A           | 0.807193   |
| TAF5L     | -0.44645   | ARHGEF7                   | 0.282189  | MIEN1                                 | 0.621469   | DNPEP            | 0.617066   |
| C1orf198  | -1.54026   | CUL4A                     | -0.846854 | ORMDL3                                | 0.282876   | CHPF             | 1.13666    |
| EGLN1     | -0.803453  | LAMP1                     | 0.12057   | MED24                                 | -0.155699  | FARSB            | -0.167433  |
| TARBP1    | -0.663304  | TMC03                     | -0.304032 | TOP2A                                 | -1.8684    | AP1S3            | -1.88789   |
| IRF2BP2   | 0.250409   | TFDP1                     | -0.43009  | TNS4                                  | -0.738628  | WDFY1            | -1.23868   |
| TOMM20    | -0.539871  | CDC16                     | 0.0867448 | SMARCE1                               | 0.0682525  | SERPINE2         | 0.887659   |
| B3GALNT2  | -0.685214  | UPF3A                     | -0.192703 | KRT10                                 | 0.383792   | CUL3             | -1.02851   |
| NID1      | -0.41567   | CHAMP1                    | -0.987108 | KRT17                                 | 0.230607   | IRS1             | -0.639382  |
| HEATR1    | -0.954865  | PSPC1                     | -0.252898 | JUP                                   | 1.0505     | COL4A4           | -2.7438    |
| FH        | 0.194119   | SKA3                      | 0.0873949 | LEPREL4                               | 0.301367   | PID1             | 0.454446   |
| CHML,OPN3 | -1.49302   | ZDHC20                    | -1.69801  | NT5C3L                                | 0.62934    | DNER             | -0.0501732 |
| CEP170    | -1.56101   | EFHA1                     | -0.791747 | ACLY                                  | -0.811887  | TRIP12           | -0.681917  |
| ADSS      | -0.742657  | PARP4                     | -0.583241 | DNAJC7                                | 0.488918   | NCL              | -0.697339  |
| HNRNPU    | -0.629945  | SLC7A1                    | -0.557883 | KAT2A                                 | 0.293962   | PDE6D            | 0.505562   |
| SMYD3     | -0.502727  | HMGB1                     | -0.445118 | RAB5C                                 | 0.435259   | USP40            | -0.197495  |
| TFB2M     | 0.333436   | HSPH1                     | -0.237915 | STAT5B                                | -1.03826   | HJURP            | -0.0116451 |
| AHCTF1    | -0.907776  | N4BP2L2                   | -0.47835  | STAT3                                 | -0.555746  | ILKAP            | 0.589172   |
| ZNF496    | 0.0682467  | SPG20                     | -0.110933 | PTRF                                  | -0.0118454 | NDUFA10          | 0.148829   |
| SH3BP5L   | 0.180835   | ALG5                      | 0.806224  | PSMC3IP                               | 0.922419   | MYEOV2           | 0.639526   |
| ZNF692    | 0.726247   | FAM48A                    | -0.673274 | PLEKHH3                               | 0.101759   | HDLBP            | -0.117779  |
| ZMYND11   | -1.25433   | TSC22D1                   | 0.631111  | COA3                                  | 0.277094   | STK25            | 0.0475159  |
| GTPBP4    | -0.020674  | TPT1                      | 0.473075  | BECN1                                 | -0.0462482 | THAP4            | 0.573238   |
| PFKP      | 0.48165    | ESD                       | -0.154885 | AARSD1,PTGES3<br>L,PTGES3L-<br>AARSD1 | 0.554753   | DTYMK            | 0.260139   |
| AKR1C3    | 0.810101   | SUCLA2                    | -0.277746 | VAT1                                  | 0.706958   | SOX12            | -0.13403   |
| NET1      | 0.122522   | MED4                      | -0.250233 | DUSP3                                 | 0.575446   | NRSN2            | 0.00569868 |
| FAM208B   | -0.932755  | EBPL                      | -0.451888 | TMEM101                               | 0.753909   | RBCK1            | 1.00666    |
| FBXO18    | -0.0739756 | KPNA3                     | -1.32673  | LSM12                                 | -0.106264  | PSMF1            | 0.546976   |
| PFKFB3    | -0.20073   | DIAPH3                    | -0.610065 | ATXN7L3                               | -0.133297  | MIR1292,NOP56,SN | 0.308193   |

|                             |            |                     |                 |                |            |                |           |
|-----------------------------|------------|---------------------|-----------------|----------------|------------|----------------|-----------|
|                             |            |                     |                 |                |            | ORD86          |           |
| LOC100507127                | 0.113557   | MZT1                | -0.693097       | UBTF           | -0.612751  | PTPRA,VPS16    | 0.129148  |
| ATP5C1                      | 0.0864842  | DIS3                | -0.690371       | SLC25A39       | 0.219881   | MRPS26         | 0.552195  |
| CDC123                      | 0.223016   | TBC1D4              | -0.878229       | CCDC43         | -0.0818485 | ITPA           | 0.821499  |
| CAMK1D,LOC28307<br>0        | -0.794786  | COMMD6              | -0.319897       | EFTUD2         | -0.152091  | CDC25B         | 0.0284658 |
| OPTN                        | 1.0558     | KCTD12              | -1.55198        | KIF18B         | -0.489886  | AP5S1,MAVS     | -0.196605 |
| MCM10                       | -0.486545  | FBXL3               | -1.39913        | PLCD3          | -0.220761  | PRNP           | 0.470996  |
| PRPF18                      | 0.232244   | MYCBP2              | -0.811396       | CDC27          | -1.72337   | PCNA-AS1       | -0.589296 |
| HSPA14                      | 0.447345   | ABCC4               | -0.5672         | MRPL10         | 0.673578   | BTBD3          | -2.04966  |
| VIM                         | 0.509132   | UGGT2               | -0.720683       | CBX1           | -0.349819  | SNRPB2         | 0.424007  |
| STAM                        | -0.0555427 | STK24               | 0.143968        | HOXB7          | 0.59634    | DSTN           | -0.752759 |
| PLXDC2                      | -1.39207   | DOCK9               | -1.13032        | SNF8           | 0.387833   | SEC23B         | 0.389882  |
| MLLT10                      | -0.64922   | GPR183              | -1.36782        | PHB            | 0.666085   | LINC00493      | 0.595814  |
| BMI1,COMMD3,COM<br>MD3-BMI1 | -0.0814376 | TEX30               | 0.34317         | SPOP           | -0.136285  | DTD1           | 0.318225  |
| MASTL                       | -0.335697  | KDELC1              | 0.0806314       | SLC35B1        | 1.11931    | NAA20          | 0.855578  |
| RAB18                       | -0.522561  | EFNB2               | -0.654289       | PPP1R9B<br>9   | 0.00050960 | XRN2           | -0.49368  |
| WAC                         | -0.577242  | ARGLU1              | -0.551225       | COL1A1         | -1.10312   | NXT1           | 0.712214  |
| CREM                        | 0.648543   | IRS2                | 0.562031        | MRPL27         | 0.860689   | ENTPD6         | 0.178914  |
| CCNY                        | -0.15435   | COL4A1              | -1.0613         | LRRC59         | 0.402934   | PYGB           | 0.404809  |
| BMS1                        | -0.222207  | RAB20               | 0.366524        | ANKRD40        | -0.603382  | HM13           | 0.867969  |
| ZNF22                       | -0.980001  | CARS2               | 0.431017        | TOB1           | -0.189157  | ID1            | 0.518128  |
| ANXA8L2                     | -1.03337   | ANKRD10,ANKRD10-IT1 | 0.841764        | SPAG9          | -0.401948  | TPX2           | -0.818674 |
| NCOA4                       | -0.577507  | TUBGCP3             | -0.902222       | COX11          | -0.340271  | TM9SF4         | -0.164824 |
| CISD1                       | -0.124592  | PCID2               | 0.174089        | MIR3614,TRIM25 | 0.742129   | MIR1825,POFUT1 | -0.518249 |
| TFAM                        | -0.768115  | GAS6                | 0.380231        | MRPS23         | 0.865067   | KIF3B          | -0.241908 |
| CDK1                        | -0.398706  | RASA3               | 0.0820316       | CUEDC1         | 0.29088    | ASXL1          | -0.324971 |
| ADO                         | 0.194086   | PARP2               | -0.0585673      | VEZF1          | -0.799023  | MAPRE1         | -0.378098 |
| HNRNPH3                     | -0.401806  | APEX1               | 0.161375        | SRSF1          | -0.828719  | CHMP4B         | 0.588385  |
| CCAR1,SNORD98               | -0.650176  | PNP                 | 0.945811        | SUPT4H1        | 0.44987    | ITCH           | -1.0824   |
| DDX50                       | 0.0535112  | METTL17             | 0.287936        | SKA2           | -0.841111  | DYNLRB1        | 0.768749  |
| DDX21                       | -0.833241  | TOX4                | 0.342404        | PTRH2          | 1.0854     | PROCR          | 0.920862  |
| KIAA1279                    | -0.161168  | ABHD4               | 0.00039199<br>2 | LOC645638      | 0.70694    | ERGIC3         | 0.531607  |
| SRGN                        | 1.41642    | OXA1L               | 0.23756         | CYB561         | 0.874542   | ROMO1          | 0.952643  |

|          |                 |                                 |                 |              |                 |                                   |            |
|----------|-----------------|---------------------------------|-----------------|--------------|-----------------|-----------------------------------|------------|
| VPS26A   | -0.202018       | MRPL52                          | 0.68259         | CCDC47       | -0.0355551      | PHF20                             | -0.794534  |
| SUPV3L1  | 0.620631        | LRP10                           | -0.10461        | FTSJ3        | 0.175409        | EPB41L1                           | -0.513335  |
| HK1      | 0.573509        | C14orf119                       | 0.213493        | SMARCD2      | 0.358494        | AAR2                              | 0.265791   |
| EIF4EBP2 | -0.888401       | BCL2L2,BCL2L2-<br>PABPN1,PABPN1 | -0.0274295      | DDX5         | -0.134564       | DLGAP4                            | 0.445069   |
| SGPL1    | -0.524503       | NGDN                            | 0.736905        | GNA13        | -1.37797        | MYL9                              | -0.160391  |
| CHST3    | -0.348518       | DHRS4                           | 0.482449        | PSMD12       | -0.0970081      | C20orf24,TGIF2,TGI<br>F2-C20ORF24 | 1.04387    |
| ANAPC16  | -0.0387934      | DHRS4L2                         | 0.192441        | FAM104A      | 0.326276        | RPN2                              | 0.150984   |
| DDIT4    | -<br>0.00141637 | DCAF11                          | 0.0169039       | CDC42EP4     | 0.0325742       | MANBAL_SRC                        | 0.433621   |
| MCU      | -1.0368         | PSME1                           | 0.698456        | ATP5H        | 0.695934        | CTNBL1                            | 0.966317   |
| SEC24C   | -0.0878247      | IRF9,RNF31                      | 0.403823        | NT5C         | 0.500979        | RPRD1B                            | -0.72295   |
| CHCHD1   | 0.38552         | GMPR2                           | 0.141394        | HN1          | 0.412732        | FAM83D                            | -0.778105  |
| VCL      | -1.04495        | NOP9                            | -1.12111        | SUMO2        | -0.163876       | TOP1                              | -0.0987922 |
| ADK      | -0.186164       | G2E3,SCFD1                      | -0.34803        | SLC25A19     | 0.546911        | PLCG1                             | -0.232348  |
| VDAC2    | 0.52835         | SRP54                           | 0.355565        | GRB2         | 0.0527303       | SRSF6                             | -0.170087  |
| RPS24    | 0.86836         | FAM177A1                        | 0.109996        | GALK1        | 0.487339        | IFT52                             | 0.26425    |
| ZMIZ1    | -0.645177       | KIAA0391                        | 0.0782493       | H3F3B        | 0.0480487       | MYBL2                             | 0.363056   |
| PPIF     | 1.53012         | PSMA6                           | 0.376507        | UNC13D       | 0.294574        | WISP2                             | -0.909136  |
| FAM213A  | 0.206783        | SSTR1                           | -1.04376        | WBP2         | 0.753597        | YWHAB                             | -0.235381  |
| GHITM    | 0.136082        | GEMIN2                          | -0.129459       | TRIM47       | 0.738651        | DBNDD2,SYS1,SYS<br>1-DBNDD2       | 0.715162   |
| FAM35A   | -0.525217       | PNN                             | -0.0471655      | TRIM65       | -0.309306       | PIGT                              | 0.484253   |
| PAPSS2   | -0.532444       | RN7SL1                          | 3.14973         | MRPL38       | 0.753784        | DNTTIP1                           | 0.97286    |
| PTEN     | -0.775073       | LRR1                            | 0.318298        | SRP68        | 0.573028        | UBE2C                             | 0.362624   |
| STAMBPL1 | 0.0157044       | MGAT2                           | 0.164186        | EXOC7        | 0.175218        | CTSA                              | 0.527151   |
| KIF20B   | -1.85088        | KLHDC2                          | -<br>0.00657673 | PRPSAP1      | -<br>0.00465666 | PCIF1                             | -0.0943496 |
| RPP30    | 0.097447        | ARF6                            | 0.194437        | MXRA7        | 0.256004        | CSE1L                             | -0.763288  |
| PCGF5    | -0.373902       | TMX1                            | -0.379224       | JMJD6        | 1.05593         | DDX27                             | 0.407148   |
| TNKS2    | -1.1443         | FRMD6                           | 0.272179        | MIR636,SRSF2 | -0.232449       | ZNFX1-AS1                         | 2.35626    |
| MARCH5   | -0.467735       | C14orf166                       | 0.719739        | TK1          | 0.0760196       | RNF114                            | 0.54094    |
| KIF11    | -1.67556        | PSMC6                           | 0.275661        | SOCS3        | -0.0585791      | SNAI1                             | 0.547965   |
| CEP55    | -0.844618       | CDKN3                           | -0.642608       | CYTH1        | -0.0323805      | CEBPB                             | 1.95673    |
| HELLS    | -1.89202        | MAPK1IP1L                       | -0.654356       | USP36        | 0.274672        | PTPN1                             | 0.0149517  |
| RPL13AP5 | 0.920343        | LGALS3                          | 0.860932        | TIMP2        | -0.650106       | PFDN4                             | -0.654528  |

|               |           |                             |            |          |           |                                 |            |
|---------------|-----------|-----------------------------|------------|----------|-----------|---------------------------------|------------|
| PGAM1         | 0.209273  | KTN1                        | -0.834051  | CANT1    | 0.255351  | CSTF1                           | -0.392329  |
| ZDHC16        | 0.195704  | AP5M1                       | -0.957484  | CBX4     | 0.839174  | RTFDC1                          | 0.453189   |
| PI4K2A        | 0.16191   | ACTR10                      | -0.0602349 | EIF4A3   | 0.61637   | RAE1                            | 0.781714   |
| MARVELD1      | -0.433271 | PSMA3                       | 0.194119   | NPTX1    | -1.42693  | VAPB                            | -0.0587313 |
| CUTC          | -0.234439 | JKAMP                       | -0.490277  | SLC38A10 | -0.126155 | NPEPL1,STX16,STX<br>16-NPEPL1   | -0.0122428 |
| SCD           | -0.913057 | PCNXL4                      | -1.17892   | ACTG1    | -0.343248 | GNAS                            | 0.241086   |
| C10orf2       | 0.84702   | MNAT1                       | 0.0808214  | C17orf70 | -0.154391 | TH1L                            | -0.0326776 |
| LZTS2         | 0.306711  | SLC38A6                     | -0.939483  | NPLOC4   | -0.119923 | LSM14B                          | 0.0535168  |
| SFXN3         | 0.134547  | HIF1A                       | -0.935692  | OXL1     | 0.89778   | GTPBP5                          | 0.622798   |
| DPCD          | 0.579126  | MTHFD1                      | -0.127219  | ARL16    | 0.597568  | ADRM1                           | 0.925873   |
| HPS6          | 0.499813  | CHURC1,CHURC1-<br>FNTB,FNTB | -0.212146  | P4HB     | 0.500109  | RPS21                           | 0.964964   |
| PPRC1         | -0.378111 | MPP5                        | -1.33017   | ARHGDI1A | 0.562737  | SLCO4A1                         | 0.957265   |
| NOLC1         | -0.250704 | EIF2S1                      | 0.233101   | ALYREF   | 0.614416  | MRGBP                           | 0.650072   |
| GBF1          | -0.769597 | SLC39A9                     | 0.0550909  | MAFG     | 0.969765  | OGFR                            | 0.595375   |
| WBP1L         | -0.462661 | SRSF5                       | 0.150918   | PYCR1    | 0.639663  | GID8                            | 0.0335447  |
| PDCD11        | 0.233242  | SMOC1                       | -0.666838  | STRA13   | 0.965455  | SLC17A9                         | 0.656275   |
| GSTO1         | 1.21746   | SIPA1L1                     | -1.08794   | DCXR     | 0.752054  | ARFGAP1                         | 0.55519    |
| ADD3          | -1.40359  | C14orf169                   | 0.0665477  | DUS1L    | 0.414026  | PPDPF                           | 0.681116   |
| SMC3          | -0.767808 | ACOT2                       | 0.00626619 | FASN     | -1.54449  | LIME1,ZGPAT                     | 0.84971    |
| MIR4680,PDCD4 | -1.20318  | PTGR2,ZNF410                | 0.637645   | CSNK1D   | 0.187278  | SLC2A4RG                        | 0.0404428  |
| SHOC2         | -1.40042  | ISCA2                       | -0.150386  | OGFOD3   | 0.350853  | TPD52L2                         | 0.601653   |
| ADRA2A        | -1.53942  | FCF1                        | -0.320901  | WDR45L   | 0.514604  | DNAJC5                          | -0.0129394 |
| GRK5          | 0.0872056 | YLPM1                       | -0.924175  | USP14    | -0.847841 | PRPF6                           | 0.120575   |
| BAG3          | 0.564278  | DLST                        | 0.210915   | TYMS     | -0.272143 | CSNK2A1                         | -0.27612   |
| WDR11         | -0.95437  | EIF2B2                      | 0.911313   | NDC80    | -0.699912 | SRXN1                           | 1.05817    |
| PLEKHA1       | -1.05304  | AHSA1                       | 0.734962   | MYL12A   | 0.203055  | FKBP1A,FKBP1A-<br>SDCBP2,SDCBP2 | 0.255343   |
| HTRA1         | 0.173877  | SLIRP                       | 0.51191    | MYL12B   | 0.496135  | NSFL1C                          | 0.653878   |
| HMX3          | -1.37792  | ZC3H14                      | -0.235182  | TGIF1    | 0.424556  | SNRPB                           | 0.6701     |
| BUB3          | -0.361964 | PSMC1                       | 0.615445   | PTPRM    | -0.945404 | IDH3B                           | 0.607729   |
| BCCIP         | 0.207429  | CALM1                       | -0.403147  | RAB12    | 0.191021  | DDR1G1                          | 1.04671    |
| DOCK1         | -1.41279  | CPSF2                       | -0.993261  | SOGA2    | -0.986204 | C20orf27                        | 0.491873   |
| GLRX3         | 0.610587  | GOLGA5                      | -0.0592344 | NDUFV2   | 0.633778  | CENPB                           | 0.397186   |
| PPP2R2D       | 0.267588  | UBR7                        | -0.280974  | TWSG1    | -1.35738  | TMEM230                         | -0.478097  |
| PWWP2B        | 0.98368   | IF127L1                     | 0.570667   | RALBP1   | -0.604864 | PCNA                            | -0.126164  |

|                                 |           |          |            |               |            |              |            |
|---------------------------------|-----------|----------|------------|---------------|------------|--------------|------------|
| INPP5A                          | -0.349055 | GLRX5    | -0.0112804 | RAB31         | -1.03016   | JAG1         | 0.347051   |
| ZNF511                          | 0.849786  | PAPOLA   | -1.27932   | VAPA          | -0.525864  | RRBP1        | 0.75497    |
| MTG1                            | 0.225025  | VRK1     | 0.101482   | CHMP1B        | -0.335874  | SNORD17,SNX5 | -0.189723  |
| LARP4B                          | -0.277533 | CCNK     | -0.140642  | IMPA2         | -0.951467  | CST3         | 1.08941    |
| IDI1                            | -0.750415 | YY1      | -0.67924   | TUBB6         | 0.208839   | APMAP        | 0.0719825  |
| PITRM1                          | 0.40336   | WDR25    | 0.433146   | PSMG2         | 0.223675   | ABHD12       | 0.278515   |
| KLF6                            | -0.217862 | PPP2R5C  | -0.208171  | SEH1L         | -0.165751  | BCL2L1       | 0.742526   |
| AKR1C2                          | 1.17161   | DYNC1H1  | -0.54208   | SNRPD1        | 0.324658   | PDRG1        | 1.2131     |
| ASB13                           | 0.087872  | RCOR1    | -1.17234   | MIR4741,RBBP8 | -0.126645  | COMMD7       | 1.46211    |
| GDI2                            | 0.0228965 | TNFAIP2  | 0.52966    | CABLES1       | -0.210219  | CDK5RAP1     | 0.717496   |
| NUDT5                           | 0.473206  | EIF5     | 0.12902    | RIOK3         | 0.210637   | SNTA1        | 0.386414   |
| SEPHS1                          | -0.205416 | MARK3    | 0.226416   | TTC39C        | -0.135883  | NECAB3       | 0.477043   |
| FAM107B                         | 0.270292  | TRMT61A  | 0.855923   | DSG2          | -1.18009   | E2F1         | 0.282674   |
| RSU1                            | -0.143641 | APOPT1   | 0.511542   | MAPRE2        | -0.34572   | EIF2S2       | 0.483261   |
| PTPLA                           | -0.446601 | KLC1     | 0.0190535  | GALNT1        | -1.54251   | AHCY         | 0.270014   |
| DNAJC1                          | 0.406568  | ZFYVE21  | -0.130056  | ELP2          | -0.16362   | PIGU         | -0.116139  |
| PIP4K2A                         | -0.534169 | KIF26A   | -0.316001  | HAUS1         | 0.0774036  | GSS          | 0.362824   |
| ARHGAP21                        | -1.23056  | INF2     | 0.386503   | CTIF          | -0.811181  | TRPC4AP      | 0.0620275  |
| ABI1                            | -0.328695 | SIVA1    | 0.624347   | SKA1          | -0.0375696 | MMP24        | -0.101869  |
| YME1L1                          | -0.414754 | KIAA0284 | -0.0841244 | ME2           | -0.330974  | EIF6         | 1.00731    |
| MKX                             | -0.900655 | BTBD6    | 0.388278   | SMAD4         | -0.717143  | UQCC         | 0.418673   |
| WAC-AS1                         | -0.118903 | MTA1     | 0.0909738  | ZNF532        | -1.04681   | CPNE1,RBM12  | 0.0891023  |
| KIF5B                           | -1.37409  | CRIP2    | -0.153647  | SEC11C        | 1.37932    | NFS1         | -0.0622975 |
| ITGB1                           | -1.0847   | CRIP1    | 0.626437   | SERPINB5      | -0.268051  | SCAND1       | 0.524907   |
| NRP1                            | 0.131608  | C14orf80 | 0.512834   | TIMM21        | -0.0321818 | LINC00657    | -0.746165  |
| PARD3                           | -0.274183 | CCNB1IP1 | 1.47032    | CNDP2         | 0.0466004  | NDRG3        | -0.636148  |
| CUL2                            | -0.509629 | OSGEP    | 0.661688   | TSHZ1         | -1.02745   | DSN1         | -0.191792  |
| HNRNPF                          | -0.185713 | TMEM55B  | 1.14111    | CTDP1         | 0.351232   | BLCAP        | 0.197765   |
| ANXA8L1,LOC64365<br>0,LOC728643 | -0.862934 | ZNF219   | -0.662511  | HSBP1L1       | 1.19097    | TTI1         | 0.595964   |
| TIMM23                          | 0.558385  | HNRNPC   | 0.0793539  | RBFA          | 0.10528    | TGM2         | 0.681758   |
| SGMS1                           | -1.27638  | SUPT16H  | -0.720622  | ADNP2         | -0.187694  | LOC388796    | 1.23037    |
| ZWINT                           | 0.1564    | CHD8     | -0.533611  | THOC1         | 0.182375   | JPH2         | -0.955022  |
| CDC6                            | -0.904855 | METTL3   | 0.0620357  | ENOSF1        | -0.396666  | C20orf111    | 1.14144    |
| RHOBTB1                         | -1.33844  | DAD1     | 0.676126   | YES1          | -1.12804   | SERINC3      | -0.70357   |
| HERC4                           | -0.849943 | PRMT5    | 0.569574   | PPP4R1        | -0.479639  | TOMM34       | 0.327476   |



|                        |                 |                           |            |                                                    |            |                                   |             |
|------------------------|-----------------|---------------------------|------------|----------------------------------------------------|------------|-----------------------------------|-------------|
| AIFM2,SAR1A,TYSN<br>D1 | 0.279504        | HAUS4,MIR4707             | 0.203922   | PIEZO2                                             | -2.60916   | SLP1                              | 0.516277    |
| PPA1                   | -<br>0.00406463 | AJUBA                     | -0.281367  | AFG3L2                                             | 0.0694691  | SDC4                              | 1.05431     |
| PCBD1                  | -0.0274154      | PSMB5                     | 0.525262   | SPIRE1                                             | -0.430628  | ACOT8                             | 0.462203    |
| PSAP                   | 0.449203        | ACIN1                     | 0.28916    | PTPN2                                              | 0.109832   | NCOA5                             | -0.061329   |
| ASCC1                  | -0.116112       | DHRS4-AS1                 | 0.522052   | ROCK1                                              | -1.39863   | SLC35C2                           | 0.593553    |
| DNAJB12                | 0.382088        | EMC9                      | 0.315123   | ABHD3                                              | 0.192938   | SULF2                             | -1.11377    |
| MICU1                  | 0.00978925      | PSME2                     | 1.00072    | NPC1                                               | 0.421397   | STAU1                             | -0.155227   |
| P4HA1                  | -0.782572       | IPO4                      | -0.0886172 | SS18                                               | -0.660619  | B4GALT5                           | -1.38897    |
| ECD                    | 0.135025        | TM9SF1                    | 0.437731   | CDH2                                               | -1.00403   | TMEM189,TMEM18<br>9-UBE2V1,UBE2V1 | 0.00483638  |
| DNAJC9                 | 0.252703        | CHMP4A                    | 0.513471   | ZNF24                                              | -0.883321  | ADNP                              | -0.936209   |
| MRPS16                 | 0.0643733       | MDP1,NEDD8,NEDD8-<br>MDP1 | 0.682397   | INO80C                                             | 0.50549    | DPM1                              | 1.0082      |
| ANXA7                  | 0.0710421       | TINF2                     | 0.234875   | RPRD1A                                             | -0.915539  | ATP9A                             | -1.85126    |
| PPP3CB                 | -1.13333        | SDR39U1                   | 0.302735   | SLC39A6                                            | -0.696754  | ZFP64                             | -0.226316   |
| CAMK2G                 | -0.141545       | HECTD1                    | -0.725523  | TPGS2                                              | -0.228387  | AURKA                             | -0.64572    |
| AP3M1                  | -0.63164        | HEATR5A                   | -1.92975   | ATP5A1                                             | -0.0214445 | PMEPA1                            | -0.219375   |
| COMTD1                 | 0.842576        | SPTSSA                    | -0.726132  | IER3IP1                                            | -0.494092  | CTSZ                              | 0.402078    |
| ZNF503                 | -0.570181       | EAPP                      | 0.0634595  | SMAD2                                              | -0.655916  | ATP5E,SLMO2,SLM<br>O2-ATP5E       | 0.677404    |
| DLG5                   | -0.835966       | SNX6                      | -0.510044  | SMAD7                                              | 0.163149   | PSMA7                             | 0.400756    |
| ZCCHC24                | -0.816317       | CFL2                      | -0.952717  | DYM                                                | -0.447168  | LAMA5,MIR4758                     | -0.913671   |
| LOC642361              | -0.341525       | BAZ1A                     | -0.826907  | C18orf32,RPL17,R<br>PL17-<br>C18ORF32,SNOR<br>D58B | 0.791815   | TCFL5                             | -0.430608   |
| ANXA11                 | 0.400922        | NFKBIA                    | 1.00519    | ACAA2                                              | 0.569159   | DIDO1                             | -0.954998   |
| WAPAL                  | -0.691098       | SEC23A                    | -1.53693   | MBD1                                               | 0.580048   | YTHDF1                            | -0.00700462 |
| GLUD1                  | 0.25188         | FKBP3                     | 0.0276264  | CXXC1                                              | 0.355734   | EEF1A2                            | -0.0447326  |
| LOC728190              | 0.646088        | MIS18BP1                  | -1.94208   | MEX3C                                              | -0.78561   | GMEB2                             | 0.0249934   |
| ATAD1                  | -0.220931       | RPS29                     | 0.941601   | MBD2                                               | -0.161465  | STMN3                             | 0.64028     |
| ACTA2                  | -2.13748        | RPL36AL                   | 0.949132   | TXNL1                                              | 0.208534   | ARFRP1                            | 0.544757    |
| LIPA                   | -0.813184       | NEMF                      | -0.956275  | NARS                                               | -0.016574  | UCKL1                             | 0.254653    |
| PPP1R3C                | -1.64485        | RN7SL2                    | 3.78914    | LMAN1                                              | -1.14935   | RGS19                             | 0.707062    |
| IDE                    | -0.978795       | MAP4K5                    | -1.31552   | KDSR                                               | 0.462367   | MIR3648,MIR3687                   | 1.67533     |
| MYOF                   | -0.796306       | SAV1                      | 0.188473   | VPS4B                                              | -0.520252  | CXADR                             | -1.41407    |

|               |            |                                 |            |              |                 |              |            |
|---------------|------------|---------------------------------|------------|--------------|-----------------|--------------|------------|
| NOC3L         | -0.628584  | PYGL                            | -0.290132  | DSEL         | -1.61531        | USP16        | -0.175192  |
| PDLIM1        | 0.0778815  | ERO1L                           | -0.480187  | TMX3         | -1.33869        | SOD1         | 0.548815   |
| ALDH18A1      | -0.476728  | GNPNAT1                         | -0.475994  | CYB5A        | 0.182802        | EVA1C        | 0.392228   |
| TCTN3         | 0.099393   | FERMT2                          | -1.11234   | ZADH2        | -0.619015       | IFNGR2       | 0.214812   |
| TM9SF3        | -1.30187   | CNIH                            | -0.110114  | PQLC1        | 0.631477        | SON          | -0.83647   |
| RRP12         | 0.365869   | GMFB                            | -2.215     | TXNL4A       | 0.418003        | MRPS6,SLC5A3 | 0.59955    |
| EXOSC1        | 1.01244    | WDHD1                           | -1.26066   | TPGS1        | 1.11719         | FAM165B      | 0.00640736 |
| MMS19         | -0.15847   | DLGAP5                          | -1.31258   | CDC34        | 1.01535         | CBR1         | 0.641033   |
| AVP1          | 0.547025   | TIMM9                           | 0.435824   | BSG          | 0.4912          | CHAF1B       | -0.468071  |
| HPS1          | 0.470237   | GPR135,L3HYDPH                  | -0.0654785 | HCN2         | -0.520358       | TTC3         | -1.19326   |
| GOT1          | 0.875716   | DHRS7                           | 1.0471     | FSTL3        | 0.421664        | DYRK1A       | -0.553429  |
| SLC25A28      | 1.36388    | HIF1A-AS2                       | -2.41591   | C19orf21     | 0.236456        | ETS2         | -0.336811  |
| DNMBP         | -0.0926803 | PPP2R5E                         | -1.10939   | PTBP1        | -0.250918       | WRB          | -0.77701   |
| ERLIN1        | -0.133934  | MAX                             | 0.372814   | CFD          | 0.033595        | BACE2        | -0.396682  |
| CWF19L1       | 0.391552   | ATP6V1D                         | 0.946503   | WDR18        | 0.299713        | NDUFV3       | 0.37966    |
| BLOC1S2       | 0.0979956  | PLEK2                           | 1.63673    | CNN2         | -0.243598       | RRP1B        | -0.909952  |
| NDUFB8        | 0.674877   | VTI1B                           | 0.526487   | ABCA7,HMHA1  | 0.262139        | PDXK         | -0.298367  |
| MRPL43        | 0.293018   | RDH11                           | 0.0260083  | GPX4         | 0.512423        | RRP1         | 0.79171    |
| NPM3          | 0.646193   | ZFP36L1                         | 0.500639   | ATP5D        | 0.810537        | PWP2         | 0.0946368  |
| MGEA5         | -0.343236  | ACTN1                           | -0.200712  | MIDN         | -0.024913       | C21orf33     | 0.382547   |
| LDB1          | -0.318512  | ERH                             | 0.077297   | CIRBP        | 0.379556        | PFKL         | -0.301369  |
| CUEDC2        | 0.580761   | COX16,SYNJ2BP,SYNJ2<br>BP-COX16 | -0.110361  | C19orf24     | 1.17395         | FAM207A      | 0.560508   |
| ACTR1A        | 0.0796851  | MED6                            | 0.54843    | MUM1         | 0.0707876       | COL18A1      | -0.338914  |
| ARL3          | -1.10792   | NUMB                            | -0.302696  | NDUFS7       | 0.839628        | COL6A1       | 0.29396    |
| NT5C2         | 0.0475654  | PNMA1                           | 0.0405312  | DAZAP1       | 0.261092        | COL6A2       | 0.778629   |
| MIR1307,USMG5 | 0.100221   | MIR4709,NPC2                    | 1.09913    | RPS15        | 1.15398         | YBEY         | 0.805751   |
| SH3PXD2A      | -1.14447   | KIAA0317                        | -0.539251  | ADAT3,SCAMP4 | 0.611812        | PRMT2        | -0.165289  |
| ITPRIP        | 0.762972   | ACYP1                           | 0.663932   | CSNK1G2      | 0.0646303       | HSPA13       | -0.808043  |
| XPNPEP1       | 0.238811   | NEK9                            | -0.164925  | DOT1L        | -0.340547       | BTG3         | 0.518275   |
| SMNDC1        | -0.337132  | TMED10                          | -0.365829  | SF3A2        | 0.589589        | MRPL39       | 0.250945   |
| BBIP1         | -0.0326689 | C14orf1                         | -0.0715062 | OAZ1         | 0.868994        | ATP5J        | 0.498369   |
| ZDHHC6        | 0.142914   | IRF2BPL                         | 0.174083   | GADD45B      | 1.39724         | APP          | -0.351166  |
| ABLIM1        | -1.46191   | SNW1                            | 0.229299   | THOP1        | 0.251047        | ADAMTS1      | -0.563489  |
| PDZD8         | -1.35862   | DIO2                            | -2.0035    | GNA11        | -<br>0.00947231 | RWDD2B       | 0.471075   |

|                |           |             |            |                             |           |                           |            |
|----------------|-----------|-------------|------------|-----------------------------|-----------|---------------------------|------------|
| FAM204A        | 0.0915428 | SEL1L       | -0.464458  | NCLN                        | 0.650393  | CCT8                      | 0.282658   |
| CACUL1         | -0.439351 | SMEK1       | -0.450125  | NFIC                        | -1.02094  | MIS18A,URB1               | -0.353164  |
| EIF3A          | -0.856699 | FBLN5       | -0.346789  | FZR1                        | -0.168608 | C21orf59                  | 0.447784   |
| SFXN4          | 0.438128  | NDUFB1      | 0.617993   | HMG20B                      | 0.259628  | GCFC1                     | -0.810805  |
| PRDX3          | -0.646315 | LGMN        | 0.489934   | GIPC3                       | -0.688655 | GART                      | -0.27104   |
| RGS10          | 0.24579   | ITPK1       | 0.285068   | MRPL54                      | 1.09357   | DONSON                    | -0.251809  |
| TIAL1          | 0.363841  | C14orf142   | 0.175634   | PIAS4                       | 0.471945  | ATP50                     | 0.590344   |
| MCMBP          | -0.383941 | DDX24       | 0.0596146  | CCDC94                      | 0.76719   | RCAN1                     | -0.07057   |
| NSMCE4A        | 0.176569  | IFI27L2     | 0.769368   | CHAF1A                      | 0.0736189 | PIGP                      | 0.0379833  |
| OAT            | -0.124734 | SETD3       | -0.0245759 | HDGFRP2                     | 0.0489936 | DSCR3                     | 0.228952   |
| FAM53B,METTL10 | -0.620882 | CCDC85C     | -0.438313  | FEM1A                       | 0.650724  | PSMG1                     | 0.242094   |
| CTBP2          | -0.179018 | WARS        | 0.922529   | UHRF1                       | -0.653043 | HMG1                      | -0.318576  |
| UROS           | 0.0941697 | BEGAIN      | 0.0699304  | SAFB                        | 0.272064  | WDR4                      | -0.263224  |
| DHX32          | 0.156377  | HSP90AA1    | -0.268938  | RPL36                       | 0.862663  | CBS                       | 0.479495   |
| ADAM12         | -1.1909   | CINP        | 0.450372   | CLPP                        | 0.858603  | U2AF1                     | 0.239196   |
| MKI67          | -1.94176  | CDC42BPB    | -0.84473   | ALKBH7                      | 0.994315  | SIK1                      | -1.14148   |
| BNIP3          | 0.244064  | CKB         | 0.259823   | TRIP10                      | 0.528463  | CSTB                      | 0.514866   |
| TUBGCP2        | 0.349327  | BAG5        | -0.22203   | ARHGEF18                    | 0.805582  | UBE2G2                    | 0.0100089  |
| FUOM           | 0.835094  | C14orf2     | 0.558453   | ZNF358                      | 0.0525438 | SUMO3                     | -0.410368  |
| ECHS1          | 0.374151  | AKT1        | 0.0786117  | MCOLN1                      | 0.793957  | PTTG1IP                   | 0.243936   |
| RIC8A          | 0.336767  | AHNAK2      | -0.60581   | PNPLA6                      | -0.141377 | POFUT2                    | 0.384393   |
| PSMD13         | 0.584148  | CDC44       | -0.0285793 | PET100                      | 1.03689   | SLC19A1                   | 0.317271   |
| IFITM2         | -0.15711  | JAG2        | -0.379354  | TRAPPC5                     | 0.901173  | LSS                       | -0.375474  |
| IFITM1         | -1.07009  | CYFIP1      | -0.484335  | MAP2K7                      | 0.344669  | MCM3AP                    | -0.517663  |
| PTDSS2         | 0.672959  | SNRPN,SNURF | 0.308455   | RPS28                       | 0.74172   | BCL2L13                   | 0.116388   |
| EPS8L2         | -0.249448 | KLF13       | -0.899609  | RAB11B                      | 0.735102  | PEX26                     | -0.405524  |
| TALDO1         | 0.734845  | ARHGAP11A   | -1.41314   | HNRNPM                      | -0.240909 | MRPL40                    | 0.541895   |
| RPLP2          | 1.06047   | GREM1       | -0.437338  | UBL5                        | 0.986921  | CDC45                     | 0.288228   |
| PNPLA2         | 1.08549   | EMC4        | 0.593238   | PIN1                        | 0.531311  | COMT,MIR4761              | 0.951252   |
| CD151          | 0.131437  | FAM98B      | -1.09561   | P2RY11,PPAN,PP<br>AN-P2RY11 | 0.531003  | DGCR8,MIR1306,MI<br>R3618 | -0.125352  |
| TSPAN4         | 0.735173  | THBS1       | -1.12145   | MRPL4                       | 0.527799  | RANBP1                    | 0.587435   |
| AP2A2          | -0.089957 | EIF2AK4     | -0.809578  | SLC44A2                     | -0.270591 | ZDHC8                     | 0.18339    |
| MRPL23         | 1.0076    | BUB1B,PAK6  | -1.10522   | ILF3                        | -0.566833 | MED15                     | 0.262772   |
| CD81           | 0.449497  | C15orf23    | -0.206508  | QTRT1                       | 0.535819  | CRKL                      | -0.0890296 |
| TSSC4          | 1.32977   | IVD         | -0.2217    | DNM2                        | -0.257037 | LZTR1                     | 0.00812537 |

|                   |            |                           |            |             |           |            |            |
|-------------------|------------|---------------------------|------------|-------------|-----------|------------|------------|
| RRM1              | -0.332812  | CHST14                    | 0.358003   | CARM1       | -0.318585 | UBE2L3     | 0.280126   |
| SMPD1             | 0.703451   | CASC5                     | -1.10755   | C19orf52    | 0.470337  | SDF2L1     | 1.8474     |
| FXC1              | 0.0840054  | VPS18                     | 0.779757   | SMARCA4     | -0.442673 | PPIL2      | -0.485418  |
| ILK               | 0.400927   | CHP1                      | -0.511603  | LDLR        | -0.338593 | BCR        | -0.279256  |
| EIF3F             | 0.698634   | OIP5-AS1                  | -0.799652  | LPPR2       | 0.0956452 | SMARCB1    | 0.247413   |
| TUB               | -1.73345   | NUSAP1                    | -1.05962   | PRKCSH      | 0.327695  | MIF        | 0.97444    |
| RPL27A            | 0.764355   | RTF1                      | -0.561925  | ASNA1       | 0.580198  | SNRPD3     | 0.469746   |
| AKIP1             | 0.0671802  | TYRO3                     | 0.249946   | JUNB        | 1.12083   | GGT1       | 0.978152   |
| IPO7              | -1.22052   | SNAP23                    | -0.587595  | RNASEH2A    | 0.759015  | POM121L10P | 0.47776    |
| WEE1              | -0.960703  | HAUS2                     | -0.192133  | GCDH        | 0.35763   | CRYBB2P1   | 1.10794    |
| SWAP70            | -0.546619  | TUBGCP4                   | -0.951976  | CALR        | 0.663074  | SRRD       | 0.849037   |
| ADM               | 1.74655    | PDIA3                     | 0.618225   | RAD23A      | 0.151493  | CCDC117    | -0.930347  |
| CTR9              | -0.398849  | HYPK,SERF2,SERF2-C15ORF63 | 0.722487   | NFIX        | -0.801117 | EWSR1      | 0.249264   |
| USP47             | -0.291203  | WDR76                     | -0.993561  | NACC1       | -0.446229 | GAS2L1     | 0.146961   |
| MICAL2            | 0.481823   | CASC4                     | -1.12246   | IER2        | 1.33558   | UQCR10     | 0.434059   |
| PARVA             | -0.717682  | CTDSP2                    | -1.60952   | MRI1        | -0.325846 | MTFP1      | 1.1492     |
| TEAD1             | -2.07162   | EIF3J                     | -0.223392  | C19orf53    | 0.695963  | OSBP2      | -0.296174  |
| FAR1              | -1.06303   | B2M                       | 0.614028   | ZSWIM4      | 0.763004  | TUG1       | -0.83535   |
| C11orf58          | 0.00305847 | SORD                      | 0.00176412 | CC2D1A      | 0.33107   | SMTN       | 0.0387128  |
| NUCB2             | 0.292994   | BLOC1S6                   | -0.49675   | DCAF15      | 0.342782  | RNF185     | 0.501404   |
| GTF2H1            | 0.338288   | DUT                       | -0.510493  | CD97        | 0.971678  | DRG1       | 0.614762   |
| LDHA              | -0.422512  | EID1                      | -0.559701  | PKN1        | 0.489924  | YWHAH      | -0.0153354 |
| NAV2              | -1.55665   | DTWD1                     | -0.688023  | MIR639,TECR | 0.470222  | FBXO7      | 0.164997   |
| HTATIP2           | 0.024029   | USP8                      | -0.687849  | SYDE1       | 0.499885  | TIMP3      | -0.279613  |
| PRMT3             | -0.413215  | TMOD3                     | -1.10305   | TPM4        | -0.48366  | HMOX1      | 2.33951    |
| ELP4              | -0.387187  | MAPK6                     | -0.333404  | RAB8A       | 0.100652  | MCM5       | -0.578853  |
| RCN1              | 0.0470402  | TCF12                     | -1.22792   | FAM32A      | 0.62317   | MPST       | 0.253208   |
| EIF3M             | 0.213924   | GCOM1,MYZAP,POLR2M        | -0.289095  | AP1M1       | -0.113818 | CDC42EP1   | 0.65019    |
| QSER1             | -2.13733   | CCNB2                     | -0.33593   | SIN3B       | 0.160995  | PDXP       | 0.7649     |
| DEPDC7            | 0.045798   | TPM1                      | -0.486591  | MYO9B       | -0.346803 | LGALS1     | 0.757019   |
| LINC00294,TCP11L1 | -0.715639  | LACTB                     | 0.186634   | USE1        | 0.768403  | NOL12      | 0.440773   |
| CAPRIN1           | -1.02534   | SNX1                      | -0.0610554 | BABAM1      | 0.258698  | TRIOBP     | -0.112047  |
| NAT10             | -0.288828  | PTPLAD1                   | -0.203847  | MRPL34      | 0.529986  | H1FO       | 0.280911   |
| CAT               | -0.698997  | RAB11A                    | 0.108223   | DDA1        | 0.865062  | GCAT       | 0.490243   |

|                             |           |          |                 |                          |            |          |            |
|-----------------------------|-----------|----------|-----------------|--------------------------|------------|----------|------------|
| PDHX                        | -0.383073 | MAP2K1   | 0.264672        | GTPBP3                   | 0.28596    | EIF3L    | 0.138902   |
| CD44                        | 0.749515  | ZWILCH   | -0.777958       | FAM125A,LOC100<br>507535 | 0.33886    | MICALL1  | 0.279612   |
| FJX1                        | 0.656246  | SMAD6    | -0.0397808      | PGLS                     | 1.06481    | POLR2F   | 0.949006   |
| TRIM44                      | -0.598471 | PIAS1    | -0.190021       | GLT25D1                  | -0.138934  | KDELR3   | -0.367416  |
| LDLRAD3                     | -0.517065 | FEM1B    | -0.78547        | MAP1S                    | 0.774722   | TOMM22   | 0.244106   |
| PRR5L                       | -0.289149 | KIF23    | -0.723584       | RPL18A                   | 0.942974   | GTPBP1   | 0.243304   |
| API5                        | -0.825848 | RPLP1    | 1.09035         | CCDC124                  | 0.688588   | SMCR7L   | 0.0418539  |
| TTC17                       | 0.571559  | ARIH1    | -0.476933       | PIK3R2                   | -0.567499  | ATF4     | 1.63743    |
| HSD17B12                    | -0.617576 | CD276    | -0.283579       | IFI30                    | 1.51457    | ADSL     | 0.20051    |
| ALKBH3                      | 0.656738  | LOXL1    | 0.348379        | MPV17L2                  | 1.15364    | SGSM3    | -0.203922  |
| EXT2                        | -0.28568  | CLK3     | 0.877987        | SSBP4                    | 0.288402   | RBX1     | 0.539928   |
| CD82                        | -0.633606 | CSK      | 0.598819        | KXD1                     | 0.753241   | L3MBTL2  | -0.146972  |
| SLC35C1                     | 0.579546  | MPI      | -0.215856       | UBA52                    | 0.847741   | ZC3H7B   | -0.452768  |
| DGKZ                        | 0.371053  | C15orf39 | 0.477863        | C19orf60                 | 0.900611   | ACO2     | 0.0691658  |
| ATG13                       | 0.467914  | COMMD4   | 0.772785        | KLHL26                   | -0.181588  | XRCC6    | -0.0301674 |
| C11orf49                    | -0.371231 | UBE2Q2   | -0.896177       | CRTC1                    | -0.797628  | SREBF2   | -0.132132  |
| DDB2                        | -0.18291  | FBXO22   | 0.0939862       | UPF1                     | 0.359792   | FAM109B  | -0.098256  |
| MADD                        | -0.187859 | RCN2     | -0.496071       | DDX49                    | 0.769705   | C22orf32 | 0.480864   |
| SLC39A13                    | 0.885216  | HMG20A   | -0.956372       | ARMC6                    | 0.415828   | TSPO     | 0.793597   |
| PTPMT1                      | 0.378646  | IDH3A    | -<br>0.00528905 | RFXANK                   | 0.803812   | SAMM50   | 0.115843   |
| NDUFS3                      | 0.882944  | IREB2    | -1.4456         | MAU2                     | 0.111481   | PARVB    | -0.0262037 |
| PTPRJ                       | -1.73415  | PSMA4    | 0.313057        | GATAD2A                  | -0.0688068 | NUP50    | -0.463318  |
| CLP1                        | 0.296146  | MORF4L1  | -0.519065       | NDUFA13                  | 0.93097    | FBLN1    | -0.0868764 |
| ZDHHC5                      | 0.398279  | TMED3    | 0.671945        | RPSAP58                  | 0.554694   | ATXN10   | -0.41877   |
| CTNND1,TMX2,TMX<br>2-CTNND1 | 0.195102  | ZFAND6   | -0.654631       | POP4                     | 0.683558   | TTC38    | -0.356267  |
| C11orf31                    | 0.789724  | FAH      | 0.535933        | CCNE1                    | -0.0529999 | GTSE1    | -0.815293  |
| CNTF,ZFP91,ZFP91-<br>CNTF   | -0.672745 | MESDC1   | 0.655663        | URI1                     | -0.139932  | TRMU     | 0.728017   |
| CCDC86                      | 0.748063  | FAM103A1 | 0.716681        | PDCD5                    | 0.426337   | CRELD2   | 1.53821    |
| TMEM109                     | -0.235773 | PDE8A    | -0.18891        | NUDT19                   | -0.0555278 | PIM3     | 0.778807   |
| TMEM132A                    | 0.589947  | MRPS11   | 0.525036        | CEBPG                    | 1.13151    | TRABD    | 0.419847   |
| TMEM138                     | 0.300196  | AEN      | 0.687485        | CHST8                    | -0.909462  | SELO     | 0.593963   |
| SDHAF2                      | 0.665606  | FANCI    | -0.373002       | KCTD15                   | 0.0186727  | NCAPH2   | 0.450553   |
| FEN1                        | 0.365629  | NGRN     | 0.690908        | LSM14A                   | -0.762112  | CECR5    | 0.291595   |

|                       |            |              |           |                                        |            |                |            |
|-----------------------|------------|--------------|-----------|----------------------------------------|------------|----------------|------------|
| FADS2                 | -0.869986  | IQGAP1       | -1.27324  | GPI                                    | 0.0399746  | ATP6V1E1       | 0.997765   |
| INCENP                | -1.22306   | CRTC3        | -1.45882  | PDCD2L                                 | 0.58259    | BID            | 0.758443   |
| METTL12,SNORA57       | -3.44476   | FURIN        | -0.363665 | UBA2                                   | -0.480045  | DGCR11,DGCR2   | -0.488071  |
| C11orf83              | 0.775915   | UNC45A       | 0.601682  | GRAMD1A                                | 0.270108   | SLC25A1        | -0.0902674 |
| TTC9C                 | 0.632469   | RCCD1        | -0.382688 | FXD5                                   | 1.31592    | HIRA           | -0.389952  |
| POLR2G                | 0.578971   | SLCO3A1      | -1.40544  | USF2                                   | 0.489636   | C22orf39       | -0.0651851 |
| TMEM179B              | 0.0230904  | LOC100507217 | 0.0657333 | TMEM147                                | 0.649266   | UFD1L          | 0.943827   |
| SLC3A2                | 1.20603    | MCTP2        | -1.4629   | HAUS5                                  | -0.105412  | C22orf29,GNB1L | -0.0569372 |
| RTN3                  | -0.245803  | NR2F2        | -0.657458 | COX6B1                                 | 0.982572   | TXNRD2         | 0.834471   |
| C11orf84              | 0.906758   | IGF1R        | -1.46125  | PSENN                                  | 1.20965    | TRMT2A         | 0.495761   |
| MARK2                 | -0.134446  | MEF2A        | -0.645917 | WDR62                                  | 0.306779   | DGCR6L         | 0.85556    |
| NAA40                 | -0.27388   | NIPA2        | -0.328394 | TBCB                                   | 0.522456   | PI4KA          | -0.239365  |
| COX8A                 | 0.665706   | UBE3A        | -0.963109 | CAPNS1                                 | 0          | THAP7          | 0.484797   |
| OTUB1                 | 0.520512   | HERC2        | -0.407348 | ZNF146                                 | -0.906793  | YDJC           | 0.721305   |
| STIP1                 | 0.351463   | TJP1         | -1.09789  | C19orf33                               | 1.21463    | MAPK1          | -0.697177  |
| NUDT22                | 0.799317   | AVEN         | 0.471957  | PSMD8                                  | 0.874789   | PRAME          | -0.182929  |
| VEGFB                 | 0.697545   | EMC7         | 0.684509  | EIF3K                                  | 0.762001   | CHCHD10        | 0.737771   |
| FKBP2                 | 1.07753    | KATNBL1      | -1.00833  | ACTN4                                  | -0.698919  | DDT            | 0.518088   |
| PLCB3                 | -0.455675  | NOP10        | 0.850569  | NFKBIB                                 | 1.81989    | GSTT1          | 0.276195   |
| GPR137                | 0.963311   | LPCAT4       | 0.44302   | MRPS12                                 | 0.797824   | GUCD1          | 0.349259   |
| ESRRA                 | 0.96844    | ACTC1        | -2.98511  | PAK4                                   | -0.0870407 | TFIP11         | 0.561068   |
| PRDX5                 | 1.20333    | AQR          | -0.800462 | SAMD4B                                 | -0.108453  | TPST2          | 0.073063   |
| RPS6KA4               | 0.184383   | ZNF770       | -1.53483  | MED29                                  | 0.24991    | MN1            | -0.453275  |
| ARL2,ARL2-SNX15,SNX15 | 0.440395   | GPR176       | 0.501239  | SUPT5H                                 | 0.267187   | PITPNB         | -0.374995  |
| SAC3D1                | 0.457886   | SRP14        | 0.25036   | TIMM50                                 | 0.353293   | CHEK2          | -0.353508  |
| ZFPL1                 | 0.621716   | FAM82A2      | 0.444678  | PSMC4                                  | 0.903325   | XBP1           | 1.22727    |
| VP55                  | -0.18214   | DNAJC17      | 0.55427   | PLD3                                   | 0.439796   | AP1B1          | 0.0443658  |
| MRPL49                | 0.602613   | INO80        | 0.468028  | SHKBP1                                 | 0.273312   | THOC5          | 0.281175   |
| CAPN1                 | 0.227546   | OIP5         | -0.49391  | LTBP4                                  | 0.43396    | NIPSNAP1       | -0.403637  |
| POLA2                 | 0.0961817  | EHD4         | -0.213891 | SNRPA                                  | 0.498325   | ASCC2          | 0.333475   |
| CDC42EP2              | 1.52032    | VPS39        | -0.200977 | EGLN2,MIA,MIA-RAB4B,RAB4B,RA B4B-EGLN2 | 0.73174    | SF3A1          | 0.0722453  |
| DPF2                  | 0.840131   | TMEM87A      | 0.166857  | AXL                                    | -0.217781  | PES1           | 0.454417   |
| MORC2                 | -0.0685288 | GNL1         | 0.499312  | FAM199X                                | -1.62287   | DSE            | -0.758612  |
| SELM                  | 0.975093   | PPP1R10      | -         | PRPS1                                  | -0.158057  | RWDD1          | -0.198684  |

|                         |            |                                     |            |                    |                 |              |            |
|-------------------------|------------|-------------------------------------|------------|--------------------|-----------------|--------------|------------|
|                         |            |                                     | 0.00196113 |                    |                 |              |            |
| PATZ1                   | 0.140175   | DHX16                               | 0.186748   | COL4A5             | -1.94989        | DCBLD1       | -1.26672   |
| PISD                    | 0.600259   | PPP1R18                             | 0.993165   | PLS3               | -1.06573        | NUS1         | -0.562169  |
| C22orf28                | 0.202126   | MDC1,NRM                            | -0.352438  | IL13RA1            | -0.476687       | ASF1A        | -0.18333   |
| MYH9                    | -0.617566  | FLOT1                               | 0.152819   | PGRMC1             | -<br>0.00836368 | GJA1         | -1.04639   |
| TXN2                    | 0.539878   | IER3                                | 2.99787    | SLC25A43           | -0.738557       | TPD52L1      | -0.0124818 |
| FOXRED2                 | -0.708728  | HLA-C                               | 0.890882   | SLC25A5            | 0.171978        | CENPW        | 0.670304   |
| EIF3D                   | 0.748048   | HLA-B                               | 1.37352    | UBE2A              | 0.202126        | RPS12        | 0.884818   |
| CARD10                  | 0.180328   | ATP6V1G2,ATP6V1G2-<br>DDX39B,DDX39B | 0.28405    | NDUFA1             | 0.781525        | EYA4         | -1.582     |
| ANKRD54,MIR658          | 0.48878    | BAG6                                | 0.378455   | STAG2              | -1.71324        | TBPL1        | 0.127444   |
| TMEM184B                | 0.00657643 | DDAH2                               | 0.277225   | OCRL               | -0.357423       | HEBP2        | 0.0397315  |
| CSNK1E,LOC100996<br>460 | 0.55126    | CLIC1                               | 1.00544    | UTP14A             | 0.676627        | ABRACL       | 1.07622    |
| DDX17                   | -0.965463  | VARS                                | -0.0179167 | MST4               | -0.990334       | VTA1         | -0.742122  |
| JOSD1                   | 0.324895   | LSM2                                | 0.36959    | PHF6               | -1.65754        | AIG1         | 0.144368   |
| SUN2                    | -1.12303   | NEU1                                | 1.81912    | HPRT1              | -0.41875        | LTV1         | 0.0329592  |
| CBX6                    | -0.542358  | EHMT2                               | -0.208162  | FAM127A            | 0.296249        | RAB32        | 0.579977   |
| RPL3                    | 0.451062   | RDBP                                | 0.712774   | FHL1               | -0.535226       | STXBP5       | -2.21154   |
| RPS19BP1                | 1.11999    | DOM3Z                               | 0.731746   | HTATSFP1           | -0.491264       | TAB2         | -0.700021  |
| MKL1                    | -0.705409  | ATF6B                               | -0.38368   | FMR1               | -1.31104        | GINM1        | -0.0513291 |
| SLC25A17                | 0.293947   | AGPAT1                              | 0.355388   | MTMR1              | -0.987146       | PCMT1        | 0.150351   |
| ST13                    | 0.0931466  | PBX2                                | 0.152798   | HMGB3              | -0.323909       | LOC100652739 | -1.58741   |
| RANGAP1                 | 0.165811   | TAP2                                | 0.535856   | VMA21              | -0.668153       | MTHFD1L      | -0.283126  |
| TOB2                    | 0.0542794  | RXRB                                | 0.00522124 | MAGEA2B,MAGE<br>A6 | -0.0982175      | AKAP12       | -0.913524  |
| PHF5A                   | 0.770372   | VPS52                               | 0.155617   | NSDHL              | 0.4717          | C6orf211     | -0.766485  |
| POLR3H                  | 0.212165   | WDR46                               | 0.386985   | BGN                | -0.21513        | SNX9         | 0.0685538  |
| PMM1                    | 0.893819   | TAPBP,ZBTB22                        | 0.13496    | SLC6A8             | 0.85764         | SYNJ2        | 0.765025   |
| DESI1                   | 0.3554     | DAXX                                | 0.453413   | ABCD1              | -0.0176438      | TMEM181      | -0.822532  |
| NHP2L1                  | 0.535745   | CUTA                                | 0.766321   | SSR4               | 1.25553         | WTAP         | 0.0742284  |
| CENPM                   | 0.267975   | BAK1                                | 1.22428    | EMD                | 0.342802        | ACAT2        | 0.0526122  |
| NDUFA6                  | 0.8348     | MNF1                                | 0.223746   | RPL10              | 0.65971         | MRPL18       | 0.566188   |
| RRP7A,RRP7B             | 0.570438   | LEMD2                               | 0.619255   | SNORA70            | -0.0490429      | IGF2R        | -0.870553  |
| POLDIP3                 | 0.385566   | NUDT3,RPS10,RPS10-<br>NUDT3         | 0.915668   | ATP6AP1            | 0.50915         | SLC22A3      | -0.897385  |

|                            |            |                  |            |                       |                 |                                                                   |            |
|----------------------------|------------|------------------|------------|-----------------------|-----------------|-------------------------------------------------------------------|------------|
| A4GALT,CYB5R3              | 0.0235391  | C6orf106         | 0.194996   | GDI1                  | 0.844851        | QKI                                                               | -1.81056   |
| ARFGAP3                    | 0.0860395  | TAF11            | -0.106815  | FAM50A                | 1.13774         | LINC00602                                                         | -2.53239   |
| PAC SIN2                   | -0.0165949 | SRPK1            | -0.405007  | IKBKG                 | 0.896753        | FGFR1OP                                                           | -0.026009  |
| MCAT                       | 0.623343   | STK38            | -0.875366  | DKC1                  | -<br>0.00637929 | TBP                                                               | 0.103187   |
| TTL12                      | -0.0995334 | PPIL1            | -0.0162442 | F8A1                  | 1.02054         | GMDS                                                              | 0.274761   |
| KIAA1644                   | -0.565875  | MTCH1            | -0.298436  | FUNDC2                | 0.439473        | SERPINB6                                                          | 0.547165   |
| LDOC1L                     | -1.06817   | CCDC167          | 0.6094     | BRCC3                 | -1.06735        | TUBB2A                                                            | 0.896486   |
| KIAA0930                   | 0.0744235  | GLO1             | -0.772587  | VBP1                  | -0.541469       | PXDC1                                                             | 0.76771    |
| WNT7B                      | 0.687427   | OARD1            | 0.38494    | FIGF,PIR,PIR-<br>FIGF | 0.213905        | ECI2                                                              | 0.397948   |
| CERK                       | -0.16597   | MED20            | -0.673246  | AP1S2                 | -0.837448       | RPP40                                                             | 0.419481   |
| ALG12                      | 0.31606    | CCND3            | -0.418906  | RBBP7                 | -0.105052       | LYRM4                                                             | 0.179077   |
| MAPK12                     | 0.249181   | MRPS10           | -0.0453309 | SH3KBP1               | 0.266431        | SSR1                                                              | 0.10004    |
| PLXNB2                     | -0.765834  | TBCC             | 0.975116   | EIF1AX                | -0.26741        | BLOC1S5,BLOC1S5<br>-<br>TXNDC5,EEF1E1,E<br>EF1E1-<br>MUTED,TXNDC5 | -0.142208  |
| SBF1                       | -0.142036  | MEA1             | 1.0703     | RPS6KA3               | -1.1131         | TFAP2A                                                            | -1.02816   |
| LMF2                       | 0.514769   | MRPL2            | 1.03292    | ACOT9                 | 0.416381        | TBC1D7                                                            | 0.095033   |
| SCO2,TYMP                  | 0.934258   | C6orf108         | 0.257568   | APOO                  | 0.201882        | RANBP9                                                            | -0.186362  |
| TRNT1                      | -0.362436  | YIPF3            | 0.660739   | DMD                   | -0.885787       | CCDC90A                                                           | -0.0142661 |
| ITPR1                      | -2.28678   | XPO5             | -1.3997    | TMEM47                | -2.06238        | NUP153                                                            | -0.97072   |
| BHLHE40                    | 0.505164   | GTPBP2           | 0.746877   | DYNLT3                | -1.45641        | KIF13A                                                            | -0.949766  |
| ARL8B                      | -0.400732  | MRPS18A          | 0.958737   | BCOR                  | -1.0481         | TPMT                                                              | -0.101986  |
| THUMPD3                    | -0.13858   | MRPL14           | 1.07887    | MED14                 | -1.16179        | DEK                                                               | -1.17619   |
| SETD5                      | -0.915665  | MIR4647,SLC35B2  | 0.15522    | FUNDC1                | 0.307807        | TDP2                                                              | 0.615009   |
| MTMR14                     | 0.779052   | TNFRSF21         | -0.256765  | NDUFB11               | 0.809453        | C6orf62                                                           | -0.560439  |
| BRPF1                      | 0.235531   | MCM3             | -0.475073  | ELK1                  | 0.0844201       | HIST1H1C                                                          | 0.564203   |
| OGG1                       | -0.0697575 | TRAM2            | -0.674826  | UXT                   | 0.828483        | HIST1H2BK                                                         | 0.0467485  |
| ARPC4,ARPC4-<br>TTL13,TTL3 | 0.265127   | ELOVL5           | -0.723816  | SLC38A5               | 0.401207        | TRIM27                                                            | 0.633386   |
| JAGN1                      | 0.746027   | DST,LOC100652766 | -1.23125   | TIMM17B               | 0.766015        | TRIM26                                                            | 0.414282   |
| FANCD2                     | -0.537563  | RAB23            | 0.015595   | SLC35A2               | 0.091533        | NELF                                                              | 0.275226   |
| BRK1                       | 0.0950109  | EEF1A1           | 0.18294    | OTUD5                 | 0.392873        | WDR85                                                             | 0.601179   |
| VHL                        | -0.357505  | COL12A1          | -1.92171   | TFE3                  | 0.53879         | ZMYND19                                                           | 0.637106   |
| TATDN2                     | -0.319174  | COX7A2           | 0.913539   | PRAF2                 | 0.405491        | C9orf37                                                           | 0.384013   |



|          |            |         |                 |              |            |                              |            |
|----------|------------|---------|-----------------|--------------|------------|------------------------------|------------|
| ATG7     | -0.350851  | TMEM30A | -1.43143        | WDR45        | 1.4606     | TBL1X                        | -0.702451  |
| MKRN2    | -0.0365944 | HMG3    | -0.412338       | GPKOW        | 0.173123   | HCCS                         | 0.697832   |
| TMEM43   | -0.554891  | FAM46A  | -1.11066        | KDM5C        | -0.378909  | PRPS2                        | -0.190109  |
| LSM3     | 0.403368   | IBTK    | -1.14697        | SMC1A        | -1.19043   | TMSB4X                       | 0.231908   |
| SLC6A6   | -0.705373  | PGM3    | 0.0735408       | HSD17B10     | 0.695306   | RAB9A                        | 0.602742   |
| RAB5A    | -0.124588  | ME1     | -0.307341       | HUWE1        | -1.38838   | CA5B,CA5BP1,LOC<br>100506661 | 0.604956   |
| UBE2E2   | -1.08864   | SNX14   | -0.658045       | LOC92249     | 0.656976   | SYAP1                        | -0.0863327 |
| UBE2E1   | -0.181314  | SYNCRIP | -0.650003       | LAS1L        | -0.0286782 | TXLNG                        | -0.394918  |
| RPL15    | 0.627918   | SNHG5   | 2.39002         | PDZD11       | 0.435479   | PDHA1                        | 0.352875   |
| CMC1     | 0.255084   | CGA     | 0.572673        | SNX12        | -0.0643352 | MBTPS2,YY2                   | -0.946466  |
| STT3B    | -1.34229   | RARS2   | -0.20289        | RPS4X        | 0.610823   | SMS                          | 0.132206   |
| CNOT10   | 0.35876    | AKIRIN2 | 0.489956        | ABCB7        | -0.302235  | PRDX4                        | 0.82342    |
| CRTAP    | -0.232497  | UBE2J1  | 0.310488        | MAGT1        | -0.555099  | EIF2S3                       | -0.353846  |
| PDCD6IP  | -0.440544  | MAP3K7  | -0.335949       | TAF9B        | -1.16251   | POLA1,SCARNA23               | -0.648826  |
| STAC     | -0.230036  | COQ3    | -0.592309       | TSPAN6       | -0.17159   | MID1IP1                      | 0.401308   |
| MLH1     | -0.0119659 | PNISR   | -0.596144       | TIMM8A       | 0.138472   | ATP6AP2                      | -0.506172  |
| GOLGA4   | -0.865202  | CCNC    | -0.664726       | GLA          | 1.24629    | USP9X                        | -1.26115   |
| OXSR1    | -0.247384  | ASCC3   | -0.961598       | ARMCX6       | 0.916269   | DDX3X                        | -1.36246   |
| SLC25A38 | 0.899438   | PREP    | -<br>0.00298226 | TCEAL8       | -0.0109428 | INE1,UBA1                    | -0.0394469 |
| RPSA     | 0.751448   | ATG5    | -0.096791       | MORF4L2      | -0.374696  | CDK16                        | 0.0755277  |
| EIF1B    | 0.895457   | SEC63   | -0.153455       | TSC22D3      | 0.734427   | USP11                        | 0.923256   |
| RPL14    | 0.734391   | SNX3    | -0.335272       | PSMD10       | -0.586909  | ARAF                         | 0.224848   |
| CTNNB1   | -0.563195  | CD164   | -1.34782        | ACSL4,KCNE1L | -0.895347  | TIMP1                        | 1.31077    |
| SS18L2   | 0.0660058  | WASF1   | -0.669059       | AMMECR1      | -1.06192   | FTSJ1                        | 0.509563   |
| ABHD5    | -0.0254911 | FYN     | -0.130908       | CXorf61      | 1.22329    | PORCN                        | 0.811262   |
| EXOSC7   | 0.51556    | LAMA4   | -0.469697       | KLHL13       | -2.1302    | EBP                          | 0.684371   |
| LARS2    | -0.313422  | HDAC2   | -0.512767       | CXorf56      | -0.0070525 | WDR13                        | 0.665144   |
| SACM1L   | -0.775609  | TSPYL1  | -0.544989       | NKRF         | -0.196747  | SUV39H1                      | 0.130084   |
| DHX30    | -0.0285274 | GOPC    | -1.53541        | RPL39        | 1.08148    | PQBP1                        | 0.979703   |
| TMA7     | 0.43888    | SERINC1 | -0.657195       | UPF3B        | -0.284852  | PLP2                         | 0.870119   |
| ARIH2    | 0.294511   | HDDC2   | 0.548297        | LAMP2        | -0.921277  | TSR2                         | 0.876155   |
| WDR6     | -0.346916  | ECHDC1  | -0.208218       | CUL4B        | -1.27214   | GNL3L                        | -0.783323  |
| NDUFAF3  | 0.0832162  | PTPRK   | -0.983071       | C1GALT1C1    | -0.288296  | MAGED2                       | 0.156974   |
| TCTA     | -0.0384827 | EPB41L2 | -0.995766       | THOC2        | -1.3708    | APEX2                        | 0.421586   |

|                               |            |              |            |          |                 |                                 |            |
|-------------------------------|------------|--------------|------------|----------|-----------------|---------------------------------|------------|
| DAG1                          | -1.76157   | CTGF         | -0.572581  | SMARCA1  | -1.91353        | UBQLN2                          | -0.820107  |
| APEH                          | 0.0184672  | SGK1         | -0.215666  | ZDHC9    | -0.152847       | LOC550643                       | 0.0664771  |
| SEMA3F                        | 0.51952    | HBS1L        | -0.366526  | ELF4     | -0.429053       | MSN                             | -0.4015    |
| GNAI2                         | 0.0173103  | AHI1         | -1.48982   | AIFM1    | 0.370672        | YIPF6                           | -0.452868  |
| SEMA3B                        | -0.111914  | BCLAF1       | -1.22997   | RAP2C    | -0.840955       | IGBP1                           | 0.626847   |
| CYB561D2                      | 0.762213   | MAP7         | -1.88211   | HS6ST2   | -1.39349        | KIF4A                           | -0.514663  |
| MAPKAPK3                      | 0.555816   | IFNGR1       | -0.086607  | FAM122B  | -1.07628        | NONO                            | -0.230409  |
| MANF                          | 1.4686     | PERP         | -0.72247   | FAM127C  | -0.48615        | OGT                             | -0.561362  |
| TEX264                        | 0.751034   | CITED2       | 0.243467   | FAM127B  | 0.618941        | PIN4                            | 0.468948   |
| ABHD14A,ABHD14A<br>-ACY1,ACY1 | 0.36233    | FUCA2        | 0.44119    | MMGT1    | -0.61748        | JPX                             | -0.699312  |
| ALAS1                         | 0.708471   | HYMAI,PLAGL1 | -0.835814  | MAP7D3   | -0.473468       | COX7B                           | 0.690007   |
| SMIM4                         | 1.38733    | SF3B5        | 1.02591    | RBMX     | -0.685076       | PGK1                            | 0.0562203  |
| GNL3                          | 0.255352   | FBXO30       | -1.17335   | ATP11C   | -2.1545         | SH3BGRL                         | -1.38793   |
| SPCS1                         | 0.00482275 | PPIL4        | -0.0157724 | LDOC1    | 0.374968        | CSTF2                           | 0.368584   |
| SLMAP                         | -0.708184  | KATNA1,LATS1 | -0.499979  | IDS      | 0.0884722       | CENPI                           | -1.55294   |
| FLNB                          | -0.578514  | NUP43        | -0.27305   | TMEM185A | 0.222107        | HNRNP2,RPL36A,<br>RPL36A-HNRNP2 | 0.695661   |
| ARL6IP5                       | -0.575032  | LRP11        | -1.41521   | CXorf40B | 0.989516        | ARMCX3                          | -0.0836739 |
| PPP4R2                        | -0.924977  | ZBTB2        | -0.43498   | CETN2    | -0.173685       | WBP5                            | 0.935544   |
| CHMP2B                        | -0.579771  | RMND1        | 0.485526   | MAGEA1   | -<br>0.00819081 | NGFRAP1                         | -0.124212  |
| COL8A1                        | -1.11938   | FBXO5        | -0.397171  | HAUS7    | 0.510262        | TCEAL4                          | 0.43145    |
| CMSS1                         | 0.230492   | MTRF1L       | 0.134289   | FAM58A   | 0.815833        | TCEAL3                          | 0.0916513  |
| NIT2                          | 0.533946   | DYNLT1       | 0.793914   | BCAP31   | 0.741498        | TCEAL1                          | 0.0244491  |
| TMEM45A                       | -0.292571  | EZR          | -0.265039  | IDH3G    | 0.491427        | ASAH1                           | 0.00655188 |
| TFG                           | 0.140263   | SOD2         | 1.52937    | L1CAM    | -0.57787        | HR                              | -2.22823   |
| PCNP                          | -0.883104  | TCP1         | 0.0796197  | NAA10    | 0.97062         | REEP4                           | 0.288672   |
| NFKBIZ,NXPE3                  | -0.385232  | LINC00473    | -2.45079   | HCFC1    | -1.16737        | TNFRSF10B                       | 0.490071   |
| ALCAM                         | -1.05172   | T            | -1.51121   | IRAK1    | 0.668956        | TNFRSF10D                       | 0.0733863  |
| PVRL3                         | -1.55099   | SFT2D1       | 0.829379   | MECP2    | 0.432811        | LOXL2                           | 0.0631008  |
| PHLDB2,PLCXD2                 | -0.934925  | MPC1         | 0.192862   | FLNA     | -1.16146        | ENTPD4                          | -0.579144  |
| ABHD10                        | -0.905174  | RPS6KA2      | -0.147301  | LAGE3    | 1.08142         | KCTD9                           | -0.833385  |
| GTPBP8                        | -0.345074  | PHF10        | -0.615799  | UBL4A    | 0.420663        | CLU                             | -0.325816  |
| ATP6V1A                       | -1.41069   | PSMB1        | 0.507712   | SLC10A3  | 0.801963        | CCDC25                          | -0.445136  |
| QTRTD1                        | -0.297305  | PDCD2        | 0.257173   | FAM3A    | 0.764304        | PBK                             | -0.812375  |
| TIMMDC1                       | 0.372348   | HEATR2       | -0.342503  | G6PD     | 0.00123331      | TMEM66                          | -0.0240073 |

|              |            |                                            |            |            |            |              |            |
|--------------|------------|--------------------------------------------|------------|------------|------------|--------------|------------|
| NDUFB4       | 0.596129   | SUN1                                       | -0.635208  | CTAG2      | 0.761283   | GTF2E2       | 0.436612   |
| FAM162A      | 0.532704   | GET4                                       | 1.44753    | RWDD4      | -0.587699  | GSR          | 0.492221   |
| PDIA5_SEC22A | -0.0677995 | MAFK                                       | 0.600453   | MLF1IP     | -0.269067  | PPP2CB       | 0.247613   |
| CHCHD6       | 0.425779   | NUDT1                                      | 0.594231   | SORBS2     | -1.92876   | TTI2         | 0.280224   |
| PLXNA1       | -0.599432  | EIF3B                                      | 0          | FAT1       | -0.749871  | LSM1         | 0.671306   |
| MCM2         | 0.185803   | CHST12                                     | -0.115374  | SDHA       | -0.0204074 | PPAPDC1B     | 0.767059   |
| PODXL2       | 0.374188   | TTYH3                                      | -0.729639  | AHRR,PDCC6 | 0.323957   | WHSC1L1      | -0.483679  |
| SEC61A1      | 0.585727   | FOXK1                                      | -0.751686  | EXOC3      | 0.448201   | TM2D2        | 0.160852   |
| RAB7A        | 0.633174   | AP5Z1                                      | 1.08223    | CEP72,TPPP | -0.0861472 | SLC20A2      | 0.49179    |
| ACAD9        | 0.300815   | LOC389458,RBAK,RBAK<br>-LOC389458,RNF216P1 | 0.382024   | TRIP13     | 0.00430961 | CEBPD        | -0.405405  |
| COPG1        | 0.120719   | WIPI2                                      | 0.0128608  | NDUFS6     | 0.683722   | PRKDC        | -1.37508   |
| C3orf37      | 0.14425    | FSCN1                                      | -0.275346  | KIAA0947   | -1.18278   | RB1CC1       | -1.45034   |
| ATP2C1       | -0.818096  | CCZ1                                       | 0.437213   | SRD5A1     | -0.297326  | ATP6V1H      | 0.579307   |
| DNAJC13      | -0.763605  | AIMP2                                      | 0.447979   | PAPD7      | -0.2081    | TCEA1        | -0.66545   |
| UBA5         | -0.489883  | RAC1                                       | 0.126336   | MTRR       | -0.271959  | LYPLA1       | -1.1506    |
| CDV3         | -0.145559  | ZDHH4                                      | 0.360379   | CCT5       | 0.140385   | RPS20        | 0.843628   |
| SRPRB        | 0.783758   | GLCC11,LOC729852                           | -1.18522   | MARCH6     | -1.28302   | IMPAD1       | -0.827076  |
| PCCB         | -0.353205  | PHF14                                      | 0.117185   | TRIO       | -1.40958   | NSMAF        | 0.439077   |
| NCK1         | -0.585455  | TMEM106B                                   | -2.29473   | FAM105A    | -1.41479   | TOX          | -0.716521  |
| FAIM         | -0.104275  | ARL4A                                      | -0.477585  | FAM105B    | -0.761929  | ASPH         | -0.769906  |
| MRPS22       | 0.47123    | BZW2                                       | -0.285894  | BASP1      | -0.60025   | GGH          | -0.0449201 |
| SLC25A36     | -1.32857   | KLHL7                                      | 0.0165892  | GUSBP1     | 0.330821   | ARMC1        | -1.21565   |
| ZBTB38       | -0.984499  | NUPL2                                      | 0.567354   | C5orf22    | -0.68917   | MYBL1        | -1.7792    |
| RNF7         | 0.265475   | MALSU1                                     | 0.176716   | SUB1       | 0.172624   | SNHG6        | 0.132364   |
| ATP1B3       | 0.348356   | MPP6                                       | -0.339024  | NPR3       | -1.03387   | COPPS5       | 0.0331201  |
| U2SURP       | -0.816264  | CBX3                                       | -0.477828  | TARS       | 0.376095   | TRAM1        | -1.05206   |
| GYG1         | 0.260604   | TAX1BP1                                    | -0.0976475 | RAI14      | -1.04896   | RPL7         | 0.348786   |
| EIF2A        | 0.148911   | GARS                                       | 1.34561    | BRIX1      | 0.0670737  | STAU2        | -0.93767   |
| SELT         | -0.814954  | FKBP9                                      | -0.227689  | DNAJC21    | -0.373005  | TCEB1        | 0.709017   |
| MBNL1        | -1.49898   | SEPT7                                      | -0.788443  | IL7R       | 0.0248925  | MRPS28,TPD52 | -0.483231  |
| GMPS         | 0.0802597  | ANLN                                       | -1.53001   | SKP2       | -1.10367   | ZFAND1       | 0.154124   |
| TIPARP       | 0.130195   | EPDR1                                      | -0.112477  | NIPBL      | -0.408015  | C8orf59      | -0.0392708 |
| RSRC1        | -0.566051  | STARD3NL                                   | -0.0118342 | WDR70      | -0.033985  | FAM82B       | -0.0174193 |
| GFM1         | -0.400771  | YAE1D1                                     | 0.109177   | OSMR       | 0.100378   | NBN          | -0.970399  |
| MFSD1        | -0.0892926 | RALA                                       | 0.12817    | C5orf51    | -1.44974   | LOC100127983 | -0.699301  |

|                             |           |                          |            |            |            |                               |           |
|-----------------------------|-----------|--------------------------|------------|------------|------------|-------------------------------|-----------|
| IQCJ,IQCJ-<br>SCHIP1,SCHIP1 | -0.107322 | CDK13                    | -0.432452  | FBXO4      | -0.155475  | KIAA1429                      | -0.811311 |
| SMC4                        | -1.30974  | MRPL32                   | 0.514037   | ZNF131     | -0.104177  | UQCRB                         | 0.348706  |
| NMD3                        | -0.541662 | STK17A                   | -0.257502  | NNT        | -1.21938   | MTERFD1                       | -0.136919 |
| SERPINI1                    | -0.764966 | BLVRA                    | 0.475023   | MRPS30     | 0.319214   | RPL30                         | 0.64707   |
| SEC62                       | -0.145628 | DBNL                     | -0.0232966 | ITGA1,PELO | 0.253881   | HRSP12                        | -0.440347 |
| PRKCI                       | -1.47397  | YKT6                     | 0.666541   | NDUFS4     | 0.416745   | COX6C                         | 0.593021  |
| FNDC3B                      | -1.35098  | OGDH                     | -0.514469  | GPX8       | -0.30468   | RNF19A                        | -1.83948  |
| ECT2                        | -1.81337  | ZMIZ2                    | -0.29945   | SKIV2L2    | -0.73275   | PABPC1                        | -0.243759 |
| MFN1                        | -1.07128  | PPIA                     | 0.443891   | GPBP1      | 0.155943   | YWHAZ                         | -0.770242 |
| ACTL6A                      | -0.127825 | CCM2                     | 0.438943   | NDUFAF2    | 0.607677   | ZNF706                        | 0.605096  |
| NDUFB5                      | -0.166073 | UPP1                     | 2.1904     | KIF2A      | -0.686937  | UBR5                          | -0.90855  |
| USP13                       | -1.31079  | EGFR                     | -0.167441  | IPO11      | -0.63371   | KLF10                         | 0.200087  |
| FXR1                        | -0.459241 | MRPS17                   | 0.386931   | CWC27      | -0.232249  | AZIN1                         | -0.222072 |
| EIF2B5                      | 0.571914  | GBAS                     | -1.30496   | PPWD1      | -0.0839885 | SLC25A32                      | -0.368539 |
| DVL3                        | -0.357326 | CCT6A                    | -0.252869  | NLN        | -0.791646  | EIF3E                         | -0.223859 |
| AP2M1                       | 0.157198  | SNORA15                  | -0.0126308 | ERBB2IP    | -1.72687   | NUDCD1                        | -0.226605 |
| ABCF3                       | 0.534325  | SUMF2                    | -0.189449  | SLC30A5    | -0.287166  | EIF3H                         | 0.306982  |
| ECE2                        | 0.608327  | VKORC1L1                 | -0.458168  | CCNB1      | -0.717101  | MIR3610,RAD21                 | -1.57501  |
| PSMD2                       | 0.568511  | ASL                      | 0.575707   | CENPH      | -0.33981   | EXT1                          | -0.149299 |
| EIF4G1                      | -0.502166 | CRCP                     | 0.722965   | MRPS36     | 0.399518   | TNFRSF11B                     | -0.336878 |
| MAP3K13                     | -0.429722 | TPST1                    | 0.099143   | CDK7       | 0.89838    | TAF2                          | -0.596374 |
| SENP2                       | 0.0125265 | LOC100996437,RABGEF<br>1 | 0.184789   | MCCC2      | -0.684128  | DSCC1                         | -0.37553  |
| DNAJB11                     | 1.18709   | TMEM248                  | -0.254777  | MAP1B      | -1.52594   | MRPL13                        | 0.218763  |
| EIF4A2                      | -0.149907 | SBDSP1                   | 0.441007   | TNPO1      | -0.961124  | DERL1                         | -0.146866 |
| CCDC50                      | -0.200164 | POM121                   | -0.568406  | BTF3       | 0.584678   | C8orf76,ZHX1,ZHX1<br>-C8ORF76 | -0.176492 |
| OPA1                        | -0.93597  | WBSCR22                  | 0.791641   | HEXB       | 0.787482   | ATAD2                         | -1.19893  |
| FAM43A                      | 0.149192  | LIMK1                    | 0.0405625  | NSA2       | 0.407405   | FBXO32                        | 0.284359  |
| PAK2                        | -1.03188  | EIF4H                    | -0.0457599 | HMGCR      | -1.25906   | TMEM65                        | -1.15585  |
| FYTTD1                      | -0.984637 | GTF2IRD1                 | -0.139666  | F2R        | -0.322988  | TATDN1                        | 0.109987  |
| RPL35A                      | 0.898491  | GTF2I                    | -1.59586   | PDE8B      | -1.89135   | KIAA0196                      | -0.79208  |
| CRBN                        | 0.0552077 | RHBDD2                   | 0.588643   | ZCCHC9     | 0.271445   | LOC100507056                  | -0.675985 |
| SUMF1                       | -0.525519 | POR                      | 1.04811    | COX7C      | 0.295723   | FAM49B                        | -0.492722 |
| TADA3                       | 0.267434  | MDH2                     | 0.593933   | RASA1      | -1.02455   | ASAP1                         | -0.888331 |
| EMC3                        | 0.956614  | HSPB1                    | 0.23535    | POLR3G     | -0.185382  | NDRG1                         | 0.830683  |

|                |                      |                                       |            |               |            |                |            |
|----------------|----------------------|---------------------------------------|------------|---------------|------------|----------------|------------|
| SEC13          | 0.429222             | PTPN12                                | -0.594911  | NR2F1         | -1.01098   | ST3GAL1        | 0.23879    |
| VGLL4          | -0.126156            | PHTF2                                 | -1.4698    | ANKRD32       | -2.52595   | EIF2C2         | -0.0230208 |
| RAF1           | 0.220771             | GNAI1                                 | -0.288936  | RHOBTB3       | -1.57886   | PTK2           | -0.207565  |
| RPL32,SNORA7A  | 0.78324              | DBF4                                  | -0.89759   | CAST          | -0.12807   | TOP1MT         | 0.470592   |
| NUP210         | -0.847137            | CLDN12                                | -0.553181  | FAM174A       | 0.422751   | ZC3H3          | 0.380151   |
| CHCHD4         | 0.438001             | CDK14                                 | -1.10908   | PAM           | -0.575036  | NAPRT1         | 0.0427029  |
| XPC            | 0.109866             | FZD1                                  | -0.662194  | PPIF5K2       | -1.57957   | EEF1D          | 1.09975    |
| FGD5-AS1       | -0.99132             | ANKIB1                                | -1.1342    | C5orf30       | -0.51137   | PYCRL          | 0.0737048  |
| MRPS25         | 0.568515             | GNG11                                 | 0.0431393  | SLC25A46      | -0.708869  | TSTA3          | 0.662465   |
| SH3BP5         | -1.02926             | PEG10                                 | -2.12303   | WDR36         | -0.683408  | FAM83H         | 0.155104   |
| METTL6         | 0.251835             | ACN9                                  | -0.321356  | EPB41L4A-AS1  | 2.26823    | MIR937,SCRIB   | -0.285142  |
| HACL1          | 0.456946             | BRI3                                  | 0.955706   | SRP19         | 0.414506   | PUF60          | 0.592864   |
| ANKRD28        | -0.467862            | TRRAP                                 | -1.41716   | AP3S1         | -0.480908  | NRBP2          | -1.07077   |
| RFTN1          | 0.269798             | ARPC1A                                | 0.296751   | COMMD10       | -1.20643   | EPPK1          | -2.13203   |
| MIR4442, TOP2B | -1.42092             | ARPC1B                                | 0.331422   | TNFAIP8       | -0.913175  | PLEC           | -0.711965  |
| AZI2           | 0.400641             | BUD31                                 | 1.19426    | HSD17B4       | -0.122208  | SHARPIN        | 0.640463   |
| OSBPL10        | -0.559548            | CPSF4                                 | 0.0284994  | SNX2          | 0.0391421  | BOP1           | 0.18433    |
| CMTM6          | -1.19309             | ZNF655                                | -0.0904541 | CSNK1G3       | -1.0635    | CPSF1,MIR939   | -0.189789  |
| DYNC1LI1       | -0.0795847           | COPS6                                 | 0.51898    | LMNB1         | -0.901164  | VPS28          | 0.637034   |
| GLB1,TMPPE     | -0.0248761           | LAMTOR4                               | 0.772749   | PRRC1         | -0.742085  | CYHR1          | 0.769581   |
| UBP1           | -1.18493             | PILRB                                 | 0.624334   | ISOC1         | -0.199237  | RECQL4         | 0.229229   |
| LRRFIP2        | 0.509992             | MEPCE                                 | 0.833141   | RAD50         | -0.726154  | C8orf82,LRRC24 | 0.466561   |
| ACAA1          | 0.643068             | PCOLCE                                | -0.0558966 | LEAP2,UQCRQ   | 0.807577   | RPL8           | 0.951879   |
| GORASP1        | -<br>0.00044083<br>5 | MOSPD3                                | 0.190541   | HSPA4         | -0.0846084 | COMMD5         | 0.79882    |
| SEC22C         | -0.942789            | GNB2                                  | 0.547845   | UBE2B         | 0.40969    | SMARCA2        | -1.16373   |
| HIGD1A         | -0.178739            | POP7                                  | 0.792287   | SEC24A        | -0.806386  | UHRF2          | 0.0953229  |
| ANO10          | -0.128959            | SLC12A9                               | 0.190626   | CAMLG         | 0.266805   | SNAPC3         | -0.690062  |
| TMEM158        | 1.53861              | TRIP6                                 | 0.6247     | C5orf24,DDX46 | -0.956904  | RRAGA          | 0.0448898  |
| CCDC12         | 0.740318             | SRRT                                  | 0.240776   | TXNDC15       | -0.0411968 | FOCAD          | -0.76974   |
| SETD2          | 0.0137884            | SERPINE1                              | 0.877744   | TGFBI         | -0.0540364 | MTAP           | -0.512765  |
| SCAP           | 0.101172             | AP1S1                                 | 0.567536   | KIF20A        | -1.3756    | ACO1           | -0.0895418 |
| ELP6           | 0.348527             | ZNHIT1                                | 1.04291    | FAM53C        | 0.135675   | DNAJA1         | 0.414937   |
| SMARCC1        | -0.976165            | CUX1                                  | -0.980991  | KDM3B         | -0.612072  | CHMP5          | 0.567557   |
| MAP4           | -0.859361            | LOC100289561,LOC1006<br>30923,PRKRIP1 | 0.700501   | CTNNA1        | -0.315767  | NFX1           | -0.355443  |

|                          |            |                                   |            |                                             |            |               |            |
|--------------------------|------------|-----------------------------------|------------|---------------------------------------------|------------|---------------|------------|
| NME6                     | 0.433836   | LRWD1.MIR5090                     | 0.793368   | MATR3.SNHG4                                 | -1.06451   | UBE2R2        | -0.536673  |
| CCDC51                   | 0.55795    | ARMC10                            | -0.445258  | PAIP2                                       | 0.0668159  | UBAP1         | 0.310918   |
| SHISA5                   | 0.335775   | PMPCB                             | -0.102478  | UBE2D2                                      | -0.0712443 | NUDT2         | 0.484011   |
| COL7A1.MIR711,PF<br>KFB4 | 0          | PSMC2                             | 0.396105   | CXXC5                                       | -1.00204   | RUSC2         | 0.217182   |
| UQCRC1                   | 0.450401   | RINT1                             | -0.4728    | CYSTM1                                      | 1.40475    | CREB3         | 0.97591    |
| NCKIPSD                  | -0.170188  | HBP1                              | -0.0469981 | ANKHD1,ANKHD1<br>-<br>EIF4EBP3,EIF4EB<br>P3 | -0.0954848 | RGP1          | -0.885223  |
| IP6K2                    | 0.380956   | BCAP29                            | -0.300542  | SLC35A4                                     | 0.0521792  | MSMP          | -0.130929  |
| PRKAR2A                  | -1.1613    | DLD                               | -0.153059  | IK.MIR3655                                  | 0.349341   | GLIPR2        | -0.603419  |
| DALRD3                   | 0.338396   | IFRD1                             | 0.749384   | WDR55                                       | -0.215684  | CLTA          | 1.02912    |
| IMPDH2                   | 0.221919   | MDFIC                             | -1.02845   | HARS2                                       | 0.414954   | MELK          | -0.372104  |
| QRICH1                   | -0.17496   | TES                               | -0.541028  | ZMAT2                                       | 0.0753346  | LOC100506710  | -0.415147  |
| QARS                     | 0.0272851  | CAV2                              | -1.04135   | KIAA0141                                    | -0.204637  | ZCCHC7        | -0.0492448 |
| USP19                    | -0.157071  | CAV1                              | -1.32667   | NDFIP1                                      | 0.0712581  | GRHPR         | 0.317276   |
| LAMB2                    | -0.773908  | MET                               | -0.553198  | TCERG1                                      | -0.842269  | ALDH1B1       | -0.432735  |
| CCDC71                   | 0.0333945  | CAPZA2                            | -0.690219  | SPINK6                                      | 0.0469266  | TJP2          | -0.0616932 |
| GPX1                     | 0.643845   | ST7,ST7-OT3                       | -0.0540752 | SPINK13                                     | -1.86966   | MAMDC2        | -1.85647   |
| RHOA                     | -0.0866556 | ING3                              | -0.554407  | ABLIM3                                      | 0.521966   | SMC5          | -1.21154   |
| GMPPB                    | -0.0239682 | ARF5                              | 0.429096   | SLC26A2                                     | -1.93005   | GDA           | 0.147297   |
| IP6K1                    | 0.0995196  | SND1                              | -0.0783385 | HMGXB3                                      | 0.729958   | ANXA1         | 0.791148   |
| IFRD2                    | 0.216347   | HILPDA                            | 0.232163   | TCOF1                                       | 0          | CEP78         | -0.481773  |
| HYAL3,NAT6               | 0.821474   | METTL2B                           | 0.150016   | NDST1                                       | -0.883985  | PSAT1         | 0.634907   |
| HYAL2                    | 0.0490592  | CALU                              | -0.62941   | GM2A                                        | -0.569844  | TLE4          | -1.17609   |
| TUSC2                    | 0.786108   | FLNC                              | 0.588609   | G3BP1                                       | -0.712021  | NAA35         | -0.12638   |
| RASSF1                   | 1.52639    | ATP6V1F                           | 0.983502   | MFAP3                                       | -0.754184  | CTSL1         | 1.92136    |
| TMEM115                  | 0.785996   | MEST                              | -0.189552  | GALNT10                                     | -0.891943  | SPIN1         | -1.91699   |
| PCBP4                    | 0.439549   | MKLN1                             | -0.561142  | LARP1                                       | -0.575488  | C9orf47,S1PR3 | -1.01845   |
| RPL29                    | 0.659583   | EXOC4                             | -0.938627  | CNOT8                                       | -0.317004  | CKS2          | -0.223718  |
| DUSP7                    | 0.30825    | BPGM                              | 0.734515   | MRPL22                                      | 0.54666    | C9orf89       | 1.31769    |
| POC1A                    | 0.32236    | CALD1                             | -1.66062   | CYFIP2                                      | -1.84241   | FAM120A       | -1.21104   |
| TWF2                     | 0.591663   | NUP205                            | -0.674609  | THG1L                                       | 0.479864   | HIATL1        | -0.532512  |
| WDR82                    | -0.639347  | C7orf73                           | -0.212576  | UBLCP1                                      | -0.597467  | C9orf3        | 0.251263   |
| BAP1                     | 0.27505    | C7orf55,C7orf55-<br>LUC7L2,LUC7L2 | -0.404863  | TTC1                                        | 0.740064   | NCBP1         | -0.534344  |

|              |           |              |           |           |                 |                                   |            |
|--------------|-----------|--------------|-----------|-----------|-----------------|-----------------------------------|------------|
| NT5DC2       | 0.477952  | LOC100129148 | -1.71646  | PTTG1     | 0.0596203       | FOXO1                             | -1.52268   |
| GLT8D1       | -0.104398 | LOC100129148 | -0.121055 | CCNG1     | -0.946358       | ANP32B                            | 0.122881   |
| RFT1         | -0.262309 | NDUFB2       | 0.905279  | HMMR      | -1.83973        | NANS                              | 1.04489    |
| TKT          | -0.103347 | SSBP1        | 0.736609  | MAT2B     | -0.70343        | TGFBR1                            | -0.8891    |
| SELK         | 1.57513   | GSTK1        | 0.463367  | WWC1      | -0.576155       | SEC61B                            | 0.930211   |
| WNT5A        | -1.02716  | CASP2        | -0.505281 | RARS      | 0.233096        | MSANTD3,MSANTD<br>3-TMEFF1,TMEFF1 | 0.629841   |
| FAM208A      | -1.55279  | ZYX          | 0.263033  | SPDL1     | -0.68848        | RNF20                             | -0.798389  |
| ARF4         | 0.0133089 | CUL1         | -0.336623 | NPM1      | -0.0432969      | SMC2                              | -1.35865   |
| PDHB         | -0.491352 | ZNF282       | 0.50509   | ERGIC1    | -0.355114       | NIPSNAP3A                         | -0.921224  |
| THOC7        | -0.11359  | LRRC61       | 0.402397  | RPL26L1   | 1.06683         | SLC44A1                           | -1.60007   |
| PSMD6        | 0.438158  | REPIN1       | 0.170707  | ATP6V0E1  | 0.76709         | TMEM38B                           | -0.139476  |
| LRIG1        | 0.102462  | ABCB8        | 0.109445  | SFXN1     | -0.644482       | RAD23B                            | -0.713917  |
| SUCLG2       | -0.849401 | SLC4A2       | -0.466386 | HIGD2A    | 0.756348        | FAM206A                           | 0.0201299  |
| UBA3         | -0.722912 | AGAP3        | 0.214827  | FAF2      | -0.315426       | AKAP2,PALM2,PAL<br>M2-AKAP2       | -0.977841  |
| ROBO1        | -1.32665  | CHPF2,MIR671 | 0.26229   | TSPAN17   | 0.328593        | DNAJC25,DNAJC25<br>-GNG10,GNG10   | -0.627519  |
| GBE1         | -0.559631 | NUB1         | 0.171476  | PRELID1   | 0.645564        | UGCG                              | -0.710196  |
| CGGBP1       | -0.990954 | GALNT11      | -1.07596  | GRK6      | -0.852006       | HSDL2                             | -0.266901  |
| CLDND1       | -0.167064 | INSIG1       | -0.63589  | PRR7      | 0.331429        | SLC31A1                           | 0.275786   |
| TOMM70A      | -0.365095 | UBE3C        | -0.523694 | TMED9     | 0.76584         | PRPF4                             | 0.0164511  |
| RPL24        | 0.955451  | DNAJB6       | 0.135065  | B4GALT7   | 0.593695        | ATP6V1G1                          | 0.807662   |
| CD47         | -0.165311 | PRKAR1B      | 0.715225  | LOC728554 | 0.00021854<br>3 | TRIM32                            | 0.011418   |
| KIAA1524     | -1.15144  | C7orf50      | 0.49204   | RMND5B    | -0.0014289      | GSN                               | -1.24269   |
| ATG3         | 0.443298  | ZFAND2A      | 1.9676    | HNRNPAB   | 0.130902        | DAB2IP                            | -0.487551  |
| CCDC80       | -1.02891  | INTS1        | 0.671302  | RUFY1     | -0.159562       | MRRF                              | 0.259229   |
| NAA50        | -1.00109  | PSMG3        | 0.699186  | CANX      | -0.384517       | RABGAP1                           | -0.0122255 |
| B4GALT4      | -0.288503 | MAD1L1       | 2.32182   | MAML1     | 0.213748        | NEK6                              | -0.457869  |
| COX17        | 0.442625  | FTSJ2        | 0.444923  | SQSTM1    | 1.89704         | LOC100129034                      | -0.135089  |
| GSK3B        | -0.654767 | BRAT1        | 0.318648  | CNOT6     | -1.19286        | OLFML2A                           | -2.13305   |
| LRRC58       | -1.79927  | GNA12        | -0.269144 | TRIM41    | 0.530798        | ARPC5L                            | 0.740478   |
| FSTL1,MIR198 | -0.846172 | TNRC18       | -0.347587 | CCDC127   | 0.778389        | RABEPK                            | 0.798934   |
| CCDC58       | 0.610541  | FBXL18       | -0.305697 | PP7080    | 0.69577         | GAPVD1                            | -0.745413  |
| KPNA1        | -0.72795  | ACTB         | -0.673785 | BRD9      | 0.372096        | STXBP1                            | -0.221464  |
| PTPLB        | -1.65375  | RNF216       | 0.0963268 | CLPTM1L   | 0.355922        | CDK9                              | -0.0201914 |

|                           |                 |                               |            |                      |            |                               |            |
|---------------------------|-----------------|-------------------------------|------------|----------------------|------------|-------------------------------|------------|
| ITGB5                     | 0.377702        | EIF2AK1                       | -0.407486  | LPCAT1               | -0.863528  | FPGS                          | 0.440843   |
| HEG1                      | -2.42233        | CYTH3                         | -0.730235  | LOC728613,SDHA<br>P3 | 0.309888   | SLC25A25                      | 1.13622    |
| SNX4                      | -0.764626       | FAM220A                       | -0.471914  | MRPL36               | 0.882275   | C9orf16                       | 1.39173    |
| SLC41A3                   | -<br>0.00216545 | DAGLB                         | 0.820218   | MED10                | 1.43955    | DNM1                          | -0.706559  |
| TPRA1                     | 2.19288         | KDELR2                        | -0.390385  | NSUN2                | -0.0263447 | SWI5                          | 0.807744   |
| MGLL                      | 0.118919        | RPA3                          | 0.424487   | FASTKD3              | -0.402601  | COQ4                          | 0.758865   |
| RUVBL1                    | 0.322577        | NDUFA4                        | 0.34368    | FAM173B              | -0.786639  | SLC27A4                       | 0.100799   |
| GATA2                     | -0.0470227      | TWIST1                        | 0.0550301  | CMBL                 | 0.0622958  | URM1                          | 0.511668   |
| RPN1                      | 0.401875        | TWISTNB                       | -0.747212  | DAP                  | 0.3716     | CERCAM                        | 0.567507   |
| ISY1,JSY1-<br>RAB43,RAB43 | 0.493841        | CDCA7L                        | -0.818947  | ANKH                 | -0.971558  | ODF2                          | -0.185499  |
| CNBP                      | 0.30861         | TOMM7                         | 0.784221   | ZNF622               | 1.18319    | GLE1                          | -0.0276211 |
| H1FX                      | 0.327086        | FAM126A                       | -0.338918  | MYO10                | -1.03077   | SPTAN1                        | 0.0139115  |
| MBD4                      | -0.0217282      | IGF2BP3                       | -0.807806  | DROSHA               | -0.172718  | SET                           | -0.446161  |
| PLXND1                    | -0.263547       | TRA2A                         | -0.325445  | GOLPH3               | -0.655499  | PKN3                          | 0.441528   |
| PIK3R4                    | -0.0896909      | DFNA5                         | -0.987896  | MTMR12               | -0.680876  | TBC1D13                       | 0.0375995  |
| MRPL3                     | -0.131516       | OSBPL3                        | -0.853063  | ZFR                  | -0.427764  | ENDOG                         | 0.782075   |
| TOPBP1                    | -0.698972       | CYCS                          | -0.272341  | RAD1                 | -0.230157  | LRRC8A                        | 0.167212   |
| SLCO2A1                   | -0.268657       | HNRNPA2B1                     | -0.714514  | NADKD1               | -0.805164  | NUP188                        | -0.605173  |
| RYK                       | -0.494215       | HOXA10,HOXA10-<br>HOXA9,HOXA9 | -0.160222  | NUP155               | -0.853263  | FAM73B                        | 0.86742    |
| AMOTL2                    | 0.0237753       | HOXA11,HOXA11-AS              | 0.757933   | RICTOR               | -1.90898   | DOLPP1                        | 0.52643    |
| ANAPC13                   | 0.391074        | HIBADH                        | -0.512602  | DAB2                 | -1.20503   | PPP2R4                        | -0.0557816 |
| STAG1                     | -1.17529        | SCRN1                         | -0.271179  | PRKAA1,TTC33         | -1.15092   | LOC100128077,LOC<br>100506190 | -0.433858  |
| COPB2                     | -0.2195         | FKBP14                        | -0.648987  | LOC100506548         | 1.07294    | NTMT1                         | 0.8491     |
| PCOLCE2                   | 0.262966        | GGCT                          | -0.0509806 | RPL37                | 0.698244   | PRRX2                         | 0.130612   |
| PLOD2                     | -1.46254        | LSM5                          | -0.348054  | OXCT1                | -0.61125   | TOR1B                         | 0.0850116  |
| HLTF                      | -1.29494        | KBTBD2                        | -0.427551  | HMGCS1               | -1.43387   | GPR107                        | -0.521854  |
| TM4SF1                    | -0.161776       | NT5C3                         | -0.229007  | C5orf28              | -0.723087  | NCS1                          | -0.199552  |
| WWTR1                     | -0.519435       | DPY19L1                       | -1.30035   | C5orf34              | -0.425897  | ASS1                          | -0.269012  |
| COMMD2                    | -0.537391       | MPLKIP                        | 0.19156    | PAIP1                | 0.107161   | FUBP3                         | -0.267433  |
| PFN2                      | -0.692468       | PSMA2                         | 0.395656   | MOCS2                | 0.361429   | EXOSC2                        | 0.142111   |
| SERP1                     | 0.0210663       | COA1                          | 0.466589   | DHX29                | -0.84023   | ABL1                          | 0.0145063  |
| SIAH2                     | 0.491381        | MRPS24,URGCP,URGC<br>P-MRPS24 | 0.799266   | PPAP2A               | 0.142074   | LAMC3                         | 0.0713095  |



|                                             |            |              |           |                                 |            |           |            |
|---------------------------------------------|------------|--------------|-----------|---------------------------------|------------|-----------|------------|
| DHX36                                       | -0.606753  | POLD2        | 0.348061  | IL6ST                           | -1.26745   | NUP214    | -0.133853  |
| SLC33A1                                     | 0.0530584  | NUDCD3       | -0.609257 | PLK2                            | 0.515234   | PRRC2B    | -0.982067  |
| SSR3                                        | 0.472447   | DDX56, TMED4 | 0.472201  | PDE4D                           | -2.07908   | POMT1     | 0.180808   |
| KPNA4                                       | -0.0774657 | H2AFV        | -0.302154 | DEPDC1B                         | -1.21828   | GTF3C4    | -0.768025  |
| PDCD10                                      | 0.114625   | PURB         | -0.933203 | C5orf43                         | -0.851803  | GTF3C5    | 0.21204    |
| GOLIM4                                      | -1.61801   | SNHG15       | 2.21937   | DIMT1                           | -0.268204  | RPL7A     | 0.470941   |
| RPL22L1                                     | 0.625117   | TBRG4        | 0.582285  | CENPK                           | -0.532342  | SURF2     | 0.851178   |
| TBL1XR1                                     | -1.84588   | IGFBP3       | -1.17188  | TAF9                            | 0.0873918  | LINC00094 | -0.319943  |
| GNB4                                        | -1.88253   | TNS3         | -1.40965  | MRPS27                          | -0.562327  | WDR5      | -0.0176101 |
| MRPL47                                      | 0.509344   | HUS1         | 0.631008  | GFM2                            | 0.0542912  | RXRA      | -0.723344  |
| DCUN1D1                                     | -1.0761    | FIGNL1       | -0.935542 | WDR41                           | -0.335054  | COL5A1    | -1.49602   |
| PARL                                        | 0.418603   | GRB10        | 0.0636807 | TBCA                            | 0.529975   | OLFM1     | -0.607007  |
| ALG3                                        | 0.881763   | SEC61G       | 0.519761  | AP3B1                           | -0.705121  | MRPS2     | 0.819961   |
| MAGEF1                                      | 0.739897   | VOPP1        | -0.173243 | ARSB                            | -0.598738  | GPSM1     | 0.617891   |
| TRA2B                                       | -0.520452  | PSPH         | 0.423979  | DHFR                            | -0.882784  | PMPCA     | 0.204125   |
| RFC4                                        | 0.022595   | CHCHD2       | 0.760003  | RPS23                           | 0.643932   | TMEM141   | 0.495075   |
| RPL39L                                      | 0.752099   | GUSB         | 0.532235  | TMEM167A                        | -0.876619  | RABL6     | -0.129399  |
| LEPREL1                                     | 0.147555   | SBDS         | 0.111888  | EDIL3                           | -2.10707   | PHPT1     | 0.634118   |
| FGF12                                       | -1.43898   | NSUN5        | 1.08504   | CCNH                            | 0.485164   | TRAF2     | 0.609788   |
| ATP13A3                                     | -1.55938   | BAZ1B        | -0.291858 | CETN3                           | -0.228579  | C9orf142  | 0.76192    |
| LSG1                                        | 0.265727   | BCL7B        | 0.570467  | ARRDC3                          | -1.32612   | UAP1L1    | 1.34347    |
| XXYL1                                       | -0.838506  | TBL2         | 0.570739  | MCTP1                           | -1.95868   | MAN1B1    | 0.217645   |
| PPP1R2                                      | -0.311174  | RFC2         | 0.191001  | TTC37                           | -1.3069    | SSNA1     | 0.862436   |
| TFRC                                        | -1.00756   | STAG3L2      | -1.51442  | GLRX                            | 1.22606    | NDOR1     | 0.872501   |
| PCYT1A                                      | -0.116159  | WBSCR16      | 0.329252  | ELL2                            | -0.0773186 | TUBB4B    | 0.317838   |
| TCTEX1D2, TM4SF1<br>9, TM4SF19-<br>TCTEX1D2 | 0.48327    | POM121C      | -0.501202 | EFNA5                           | -0.396324  | COBRA1    | 0.300793   |
| NCBP2                                       | -0.3743    | STYXL1       | 1.48233   | PJA2                            | -1.71859   | TOR4A     | 1.09805    |
| DLG1                                        | -0.587073  | YWHAG        | -0.930681 | STARD4                          | -1.45459   | MRPL41    | 1.1989     |
| PIGG                                        | -0.0429055 | TMEM60       | 0.0112498 | NREP                            | -2.23852   | EHMT1     | -0.802445  |
| FGFRL1                                      | -0.106955  | SEMA3C       | -1.87657  | REEP5                           | 0.00545821 | CBWD1     | 0.279654   |
| MAEA                                        | 0.201329   | CACNA2D1     | -2.76645  | TICAM2, TMED7, T<br>MED7-TICAM2 | -1.18692   | KIAA0020  | 0.00389287 |
| TACC3                                       | -0.134936  | C7orf23      | 0.223102  | ATG12                           | 0.848093   | AK3       | -0.716214  |
| WHSC1                                       | -0.863984  | SRI          | -0.192337 | LOX                             | -0.930165  | RANBP6    | -1.01826   |
| C4orf48                                     | 1.25245    | CYP51A1      | -0.753934 | PPIC                            | 0.0555306  | C9orf123  | 0.561121   |

|          |            |                               |            |            |            |          |            |
|----------|------------|-------------------------------|------------|------------|------------|----------|------------|
| RNF4     | -0.083782  | CDK6                          | -1.00508   | ALDH7A1    | -0.55222   | PSIP1    | -1.10535   |
| ADD1     | -0.396001  | TFPI2                         | 0.478748   | FBN2       | -1.05812   | HAUS6    | -0.874296  |
| HTT      | -1.1306    | SGCE                          | 0.203657   | HINT1      | 0.533464   | RPS6     | 0.591853   |
| STK32B   | -0.350654  | PON2                          | -0.790254  | P4HA2      | 0.464785   | MLLT3    | -0.823199  |
| MRFAP1   | 0.0703892  | SLC25A13                      | -0.782237  | AFF4       | -1.40193   | KLHL9    | -0.842089  |
| LOC93622 | 0.35438    | SHFM1                         | 0.604499   | FSTL4      | -1.07051   | MIR31HG  | -0.955483  |
| HTRA3    | 0.169816   | ASNS                          | 1.72398    | C5orf15    | -0.555173  | CDKN2A   | 0.425378   |
| LAP3     | 0.465465   | MGC72080                      | 0.793829   | VDAC1      | -0.17572   | CDKN2B   | -0.794501  |
| MED28    | -0.054212  | BAIAP2L1                      | 0.0895959  | SKP1       | 0.65251    | TUSC1    | 0.295577   |
| NCAPG    | -1.11858   | PDAP1                         | 0.52154    | PPP2CA     | -0.107879  | CAAP1    | -0.202521  |
| C4orf52  | 0.847782   | ATP5J2,ATP5J2-<br>PTCD1,PTCD1 | 0.871959   | CDKN2AIPNL | 0.0467064  | PLAA     | -0.19253   |
| RBPJ     | -1.53555   | ZNF3                          | 0.661936   | PITX1      | -0.124727  | NDUFB6   | 0.282687   |
| PCDH7    | -0.802511  | MCM7                          | -0.0894344 | H2AFY      | 0.0403316  | APTX     | 0.472381   |
| PGM2     | -0.192484  | TAF6                          | -0.0810787 | SPOCK1     | -1.14072   | SMU1     | -0.125887  |
| FAM114A1 | -0.963685  | PPP1R35                       | 0.579856   | HNRNPA0    | -0.199451  | B4GALT1  | -0.896531  |
| KLHL5    | -0.713281  | TSC22D4                       | 0.836183   | BRD8       | -0.333101  | BAG1     | 0.664983   |
| UBE2K    | -0.407456  | LRCH4                         | 0.423386   | CDC23      | -0.522118  | AQP3     | -1.27684   |
| LIMCH1   | -1.30814   | GIGYF1                        | 0.288953   | ETF1       | 0.0250647  | NOL6     | -0.244954  |
| TMEM33   | 0.430855   | EPHB4                         | -0.061016  | HSPA9      | 0.268437   | UBAP2    | 0.117466   |
| SLC30A9  | -0.881563  | PLOD3                         | 0.783254   | SIL1       | 0.524791   | DCAF12   | -0.297594  |
| OCIAD1   | -0.0653228 | FIS1                          | 0.723211   | TMEM173    | 1.28741    | RPP25L   | 0.724161   |
| DANCR    | 0.0736897  | POLR2J                        | 0.708455   | PFDN1      | 0.324885   | DCTN3    | 0.575833   |
| FIP1L1   | 0.654347   | DNAJC2                        | 0.138985   | SRA1       | 1.2919     | SIGMAR1  | 0.0527418  |
| TMEM165  | -0.635022  | ORC5                          | -0.321931  | NDUFA2     | 0.738091   | VCP      | 0.0928485  |
| PAICS    | -0.61953   | SRPK2                         | -0.904106  | HARS       | 0.629416   | FANCG    | 0.232021   |
| SRP72    | -0.683448  | PUS7                          | -0.788947  | TAF7       | 0.29136    | PIGO     | -0.354083  |
| POLR2B   | -0.625468  | SYPL1                         | -0.870728  | DIAPH1     | -0.560523  | STOML2   | 0.635196   |
| AMTN     | -0.84727   | NAMPT                         | 0.201978   | HDAC3      | 0.267972   | ARHGEF39 | -0.0241964 |
| UTP3     | 0.622162   | COG5                          | -0.602549  | GNPDA1     | 1.01696    | TPM2     | 0.496564   |
| DCK      | -0.833724  | LAMB1                         | 0.192248   | NR3C1      | -1.12999   | TLN1     | -1.14191   |
| USO1     | -0.776911  | IMMP2L                        | -0.1018    | YIPF5      | -0.0637555 | HINT2    | 0.816396   |
| SEPT11   | -1.19744   | LOC401397                     | -0.0494339 | LARS       | -0.463055  | TOMM5    | 0.220188   |
| MRPL1    | -0.350657  | TSPAN12                       | -0.112882  | DPYSL3     | -0.650144  | EXOSC3   | 0.130822   |
| ANXA3    | 0.125086   | FAM3C                         | 0.12091    | CSNK1A1    | -0.223227  | SHB      | 1.00104    |
| ENOPH1   | 0.0638267  | NDUFA5                        | -0.485025  | RPS14      | 0.712982   | KLF9     | -1.18673   |

|                |           |          |           |            |            |           |             |
|----------------|-----------|----------|-----------|------------|------------|-----------|-------------|
| COPS4          | -0.357559 | WASL     | -0.856246 | DCTN4      | -0.976197  | TMEM2     | -0.790527   |
| MRPS18C        | 0.315829  | IMPDH1   | 0.381511  | TNIP1      | 1.76333    | ZFAND5    | -0.101029   |
| SMARCAD1       | -1.28074  | TNPO3    | -0.515685 | ANXA6      | 0.0222454  | C9orf40   | -0.00756992 |
| PDLIM5         | -0.90753  | UBE2H    | 0.0424573 | ATOX1      | 1.21301    | C9orf41   | -1.21927    |
| RAP1GDS1       | -0.396395 | ZC3HC1   | 0.2759    | GEMIN5     | -0.449285  | RFK       | -0.886022   |
| METAP1         | -0.725339 | TMEM209  | -0.893479 | ADAM19     | 0.0598728  | PRUNE2    | -2.65733    |
| NFKB1          | 0.66038   | PODXL    | -0.509569 | CLINT1     | -0.626465  | GNAQ      | -1.22379    |
| NPNT           | -2.26036  | CHCHD3   | 0.489768  | RNF145     | -0.903249  | TLE1      | 0.74795     |
| AIMP1          | 0.133468  | AKR1B1   | 0.658894  | SLU7       | 0.651307   | UBQLN1    | -0.18159    |
| HADH           | -0.17481  | C7orf49  | 0.587373  | NUDCD2     | -0.167217  | C9orf64   | -0.224403   |
| RPL34          | 0.599694  | MTPN     | -1.27131  | PANK3      | -0.588261  | HNRNPK    | -0.489197   |
| OSTC           | 0.109085  | CREB3L2  | -1.09403  | FBXW11     | -0.732328  | GOLM1     | -0.364845   |
| GAR1           | 0.103263  | KIAA1549 | -1.28041  | DUSP1      | 1.10454    | ISCA1     | -0.064362   |
| LARP7          | -0.246415 | ZC3HAV1  | -0.711351 | STC2       | 2.71932    | GAS1      | -1.61215    |
| UGT8           | -1.46981  | MKRN1    | 0.155802  | BOD1       | 0.944568   | ROR2      | -0.865825   |
| SNHG8          | 1.76076   | EZH2     | -0.181475 | THOC3      | 0.130649   | SPTLC1    | -0.125382   |
| EXOSC9         | 0.416494  | PDIA4    | 0.857866  | KIAA1191   | 0.457694   | IARS      | 0.323725    |
| FGF2           | -1.12694  | CDK5     | 0.0688422 | NOP16      | 0.821635   | NOL8      | 0.0828366   |
| HSPA4L         | -0.925027 | FASTK    | 0.714377  | CLTB       | 0.890065   | IPPK      | -0.132243   |
| PLK4           | -1.0043   | TMUB1    | 0.765105  | RAB24      | 0.989912   | BICD2     | -0.112717   |
| PHF17          | -1.01776  | ABCF2    | 0.141175  | LMAN2.MXD3 | 0.661269   | NINJ1     | 0.561705    |
| NAA15          | -1.31516  | RHEB     | 0.0701216 | DBN1       | -0.173391  | FAM120AOS | 0.172068    |
| MGST2          | 0.738597  | LMBR1    | -1.37593  | PDLIM7     | -0.115986  | BARX1     | -0.252584   |
| ZNF330         | 0.447364  | NCAPG2   | -1.05523  | DDX41      | 0.305688   | ZNF367    | -1.047      |
| SMARCA5        | -0.567129 | ESYT2    | -1.16743  | NHP2       | 0.49223    | AAED1     | 0.2391      |
| ABCE1          | -1.06852  | ARHGEF10 | -0.699707 | HNRNPH1    | -0.601013  | TRIM14    | -0.5715     |
| LSM6           | 0.579043  | AGPAT5   | -0.868462 | MGAT4B     | 0.594092   | TBC1D2    | 0.700979    |
| TMEM184C       | -0.629512 | ERI1     | -0.589176 | TBC1D9B    | -0.184971  | ALG2      | 1.06416     |
| RPS3A,SNORD73A | 0.618033  | FDFT1    | -0.239006 | MAPK9      | -0.523801  | ERP44     | 0.183987    |
| MND1           | 0.168052  | TUSC3    | 0.0746335 | MGAT1      | 0.795069   | TEX10     | -0.0189991  |
| TMA16          | -0.328163 | VPS37A   | 0.0705935 | TRIM7      | 0.382535   | MRPL50    | 0.364839    |
| MSMO1          | -1.20177  | SLC7A2   | -0.148684 | GNB2L1     | 0.630657   | TMEM246   | -0.0936451  |
| CPE            | -0.657963 | PCM1     | -0.988182 | FOXQ1      | 0.245507   | KLF4      | 0.956787    |
| TLL1           | -1.27209  | SH2D4A   | -0.102932 | FOXF2      | 0.0459717  | IKBKAP    | -0.65049    |
| PALLD          | -0.922289 | INTS10   | 0.126703  | FOXC1      | -0.0591723 | CTNNA1    | -0.630886   |
| CLCN3          | -1.37741  | LPL      | -1.34953  | WRNIP1     | 0.182726   | TMEM245   | -1.07902    |

|                        |            |          |            |                               |            |                               |            |
|------------------------|------------|----------|------------|-------------------------------|------------|-------------------------------|------------|
| GALNT7                 | -2.08449   | ATP6V1B2 | 0.365331   | NQO2                          | 0.837078   | TXN                           | 0.875298   |
| SAP30                  | -0.209988  | XPO7     | -0.652462  | PSMG4                         | 0.591384   | KIAA0368                      | -0.585654  |
| SPCS3                  | -0.626416  | BMP1     | -0.22035   | FAM50B                        | 0.340886   | PTGR1                         | 1.12365    |
| NEIL3                  | -0.54487   | POLR3D   | 0.727408   | PRPF4B                        | -1.32712   | PTBP3                         | -1.54762   |
| CDKN2AIP               | -0.485204  | SLC39A14 | -0.139466  | CDYL                          | -0.212519  | INIP                          | -0.419159  |
| SLC25A4                | -0.0543247 | SORBS3   | 0.316371   | FARS2                         | 0.152147   | FKBP15                        | 0.315088   |
| FRG1                   | 0.380773   | PDLIM2   | -0.0286445 | RIOK1                         | 0.288873   | CDC26                         | 0.435455   |
| ATP5I                  | 0.764762   | KIAA1967 | 0.0564631  | SNRNP48                       | -0.592599  | POLE3                         | 0.0389362  |
| GAK                    | 0.651478   | CHMP7    | 0.524237   | BMP6                          | -0.356299  | DFNB31                        | 0.167437   |
| RNF212                 | -0.168344  | R3HCC1   | 0.616531   | PAK1IP1                       | -0.115679  | CDK5RAP2                      | 0.652256   |
| CTBP1                  | -0.266289  | SLC25A37 | 0.539946   | TMEM14C                       | 0.0629959  | MEGF9                         | -1.13017   |
| SLBP                   | -0.175584  | DOCK5    | -0.852223  | TMEM14B                       | -0.0579962 | FBXW2                         | -0.118455  |
| LETM1                  | 0.106141   | CDC42    | -0.938043  | NOL7                          | 0.656615   | PSMD5                         | -0.603675  |
| MIR943,WHSC2           | 0.402402   | PPP2R2A  | -0.213125  | RNF182                        | -2.41433   | PHF19                         | -0.21629   |
| MIR4800,MXD4           | -0.251978  | BNIP3L   | -0.037801  | CD83                          | -0.636883  | RAB14                         | -0.700701  |
| TNIP2                  | 1.22456    | DPYSL2   | -1.27569   | CAP2                          | -1.20894   | STOM                          | -0.734492  |
| MFSD10                 | 0.586469   | SCARA3   | -1.06674   | E2F3                          | -0.898415  | NDUFA8                        | 0.620754   |
| NOP14                  | -0.0192017 | ESCO2    | -0.824828  | SOX4                          | -1.1811    | PDCL                          | -0.178755  |
| LRPAP1                 | 0.589924   | ELP3     | 0.17649    | GMNN                          | 0.197887   | RC3H2                         | -1.12408   |
| LYAR                   | 0.759012   | EXTL3    | -0.0240405 | HIST1H2AC                     | -0.522338  | STRBP                         | -0.323177  |
| STX18                  | 0.557366   | LEPROTL1 | -0.399738  | HIST1H2BD                     | -0.225565  | DENND1A                       | -0.549777  |
| MRFAP1L1               | 0.0465339  | DCTN6    | 0.13132    | HMGNA4                        | -0.0659229 | PSMB7                         | 0.619329   |
| GRPEL1                 | 0.80248    | ZNF703   | 0.424354   | ABT1                          | 0.552867   | RPL35                         | 1.08678    |
| AFAP1                  | -0.924455  | ERLIN2   | -0.307503  | HLA-A,HLA-H                   | 0.845528   | PPP6C                         | -0.0459588 |
| ACOX3                  | -0.91471   | PROSC    | -0.191446  | ZNRD1                         | 1.15757    | HSPA5                         | 1.4652     |
| WDR1                   | -0.220908  | EIF4EBP1 | 1.15076    | PPP1R11                       | 0.374919   | MAPKAP1                       | -0.181396  |
| RAB28                  | -0.452814  | ASH2L    | -0.298505  | RPP21,TRIM39,T<br>RIM39-RPP21 | 0.836903   | RPL12                         | 0.874091   |
| FBXL5,LOC1009966<br>23 | -0.117842  | DDHD2    | -0.944297  | HLA-E                         | 1.33928    | FAM129B                       | 0.429623   |
| QDPR                   | 0.489329   | TACC1    | -0.707956  | ABCF1                         | 0.122577   | PTRH1                         | 0.601121   |
| GPR125                 | -0.834509  | PLEKHA2  | -1.8265    | MRPS18B                       | 0.617465   | ENG                           | 0.147014   |
| DHX15                  | -0.512209  | ADAM9    | -1.1709    | TUBB                          | -0.170721  | AK1,ST6GALNAC4,<br>ST6GALNAC6 | 0.592712   |
| SEL1L3                 | 0.0285408  | C8orf4   | -0.197268  | DDR1                          | -0.16504   | DPM2                          | 0.538835   |
| RFC1                   | -0.200896  | GOLGA7   | 0.140767   | GTF2H4,VARS2                  | 0.640505   | PTGES2                        | 0.432829   |
| RPL9                   | 0.648954   | GINS4    | -0.555415  | TCF19                         | -0.560524  | CIZ1                          | 0.340875   |

|                 |            |                           |            |                           |            |          |            |
|-----------------|------------|---------------------------|------------|---------------------------|------------|----------|------------|
| UGDH            | 0.892358   | AGPAT6                    | 0.173738   | MICA                      | 0.935174   | GOLGA2   | -0.458903  |
| PDSSA           | -1.35875   | POLB                      | 0.746597   | NFKBIL1                   | 1.26471    | TRUB2    | 0.117126   |
| COMMD8          | -0.583772  | VDAC3                     | 0.0987984  | PRRC2A                    | -0.50237   | WDR34    | -0.0398726 |
| OCIAD2          | 1.39626    | C8orf40                   | 0.545508   | CSNK2B                    | 0.849449   | ZDHC12   | 0.00830345 |
| SGCB            | -0.45505   | FNTA                      | 0.231543   | HSPA1A                    | 0.969937   | ZER1     | -0.211325  |
| SCFD2           | -0.456319  | HGSNAT                    | -1.0594    | HSPA1B                    | 0.794287   | C9orf114 | 0.470308   |
| NMU             | -0.359942  | KIAA0146                  | -0.920207  | C6orf48                   | 1.92254    | CCBL1    | -0.441398  |
| PPAT            | -0.61409   | MCM4                      | -0.572823  | SKIV2L                    | -0.0791828 | DOLK     | 0.45235    |
| NOA1            | 0.0866953  | UBE2V2                    | -0.729673  | EGFL8,PPT2,PPT<br>2-EGFL8 | 0.511066   | SH3GLB2  | 0.176757   |
| IGFBP7          | 0.392993   | MRPL15                    | 0.466432   | RNF5                      | 0.406755   | IER5L    | 0.78839    |
| UBA6            | -1.25972   | TGS1                      | -0.384107  | BRD2                      | 0.730796   | ASB6     | 0.767459   |
| YTHDC1          | -0.314243  | CHCHD7                    | 0.143888   | SLC39A7                   | 0.407656   | PTGES    | 1.57017    |
| GRSF1           | -0.296892  | SDCBP                     | 0.145259   | RING1                     | 0.203662   | TOR1A    | 0.349758   |
| ANKRD17         | -1.25639   | RAB2A                     | -0.665935  | RPS18                     | 0.978201   | C9orf78  | 0.097207   |
| G3BP2           | -1.29124   | YTHDF3                    | -0.893141  | PFDN6                     | 0.713788   | FBNP1    | -0.314197  |
| SDAD1           | 0.1253     | MTFR1                     | -0.656859  | KIFC1                     | -0.410728  | UCK1     | 0.364169   |
| NUP54           | -0.200428  | RRS1                      | 0.0866792  | ITPR3                     | 0.649542   | RAPGEF1  | 0.10886    |
| SCARB2          | -0.693028  | TERF1                     | -0.629558  | HMGA1                     | 1.07119    | MED27    | 0.530103   |
| CCNI            | -0.613582  | RDH10                     | -0.447261  | SNRPC                     | 0.700384   | TTF1     | 0.27596    |
| HNRNPD          | 0          | TMEM70                    | -0.0501389 | RPL10A                    | 0.546063   | DDX31    | 0.099794   |
| HNRPDL          | -0.156173  | FABP5                     | 0.671367   | MAPK14                    | -0.488255  | SURF6    | 0.744384   |
| SEC31A          | -0.540002  | WWP1                      | -0.757759  | KCTD20                    | -0.918414  | MED22    | 0.0215804  |
| LIN54,THAP9-AS1 | 0.528415   | CPNE3                     | -1.36368   | SRSF3                     | -0.432571  | SURF1    | 0.864213   |
| PLAC8           | -1.16957   | DECR1                     | -0.47767   | CDKN1A                    | 1.8255     | SURF4    | 0.415018   |
| COQ2            | -0.697848  | INTS8                     | -0.91984   | C6orf89                   | -1.11622   | REXO4    | 0.729869   |
| HSD17B11        | -0.537604  | LOC100506538,TP53INP<br>1 | 0.364029   | FTSJD2                    | -0.183777  | SLC2A6   | 0.660563   |
| PIGY            | -0.188159  | PTDSS1                    | 0.221767   | ZFAND3                    | 0.267627   | VAV2     | -0.405032  |
| SNCA            | -0.0564168 | SDC2                      | -1.00231   | FOXP4                     | -0.657649  | BRD3     | -0.792853  |
| EIF4E           | -0.354152  | MTDH                      | -0.722949  | PRICKLE4,TOMM<br>6        | 0.544787   | RNU6ATAC | 1.06249    |
| ADH5            | 0.171505   | LAPTM4B                   | -0.12476   | BYSL                      | 0.825569   | C9orf116 | 0.208091   |
| LAMTOR3         | 0.419081   | POLR2K                    | 0.517992   | RPL7L1                    | -0.474637  | CAMSAP1  | -0.31311   |
| H2AFZ           | 0.164621   | ATP6V1C1                  | 0.214451   | CNPY3                     | 0.760546   | UBAC1    | 0.00959483 |
| PPP3CA          | -1.25421   | FZD6                      | -1.00116   | PPP2R5D                   | -0.171545  | NACC2    | -1.46028   |
| SLC39A8         | -0.408736  | DCAF13                    | 0.107919   | KLHDC3                    | -0.258324  | C9orf69  | 0.286152   |

|             |            |                               |            |          |                      |                           |           |
|-------------|------------|-------------------------------|------------|----------|----------------------|---------------------------|-----------|
| UBE2D3      | -0.23742   | OXR1                          | 0.335799   | RRP36    | 0.405959             | QSOX2                     | -0.237579 |
| CENPE       | -2.19707   | EMC2                          | -0.0139071 | SRF      | -0.347586            | DNLZ                      | 1.19188   |
| PPA2        | -0.443851  | ENY2                          | 0.497068   | TJAP1    | 0.955424             | SNAPC4                    | 0.943862  |
| INTS12      | 0.812613   | NOV                           | 1.00345    | MAD2L1BP | 0.932935             | SDCCAG3                   | 0.672416  |
| PAPSS1      | -0.613066  | FAM91A1                       | -0.862202  | SLC29A1  | 0.128552             | SEC16A                    | -0.210934 |
| ELOVL6      | -0.293065  | NDUFB9                        | 1.02449    | HSP90AB1 | 0.04622              | NOTCH1                    | -0.263038 |
| CAMK2D      | -0.756865  | SOLE                          | -0.715761  | CDC5L    | -0.247652            | AGPAT2                    | 1.49418   |
| ARSJ        | -0.965456  | NSMCE2                        | 0.557507   | CD2AP    | -1.58594             | SNHG7,SNORA17,S<br>NORA43 | 0.987495  |
| PRSS12      | -0.687399  | MYC                           | 0.499511   | CENPQ    | -0.14173             | EDF1                      | 0.900596  |
| SEC24D      | -0.0914035 | LOC100507101,MIR1204<br>.PVT1 | 1.16178    | TMEM14A  | -0.0663487           | FBXW5                     | 0.522445  |
| C4orf3      | -0.522772  | EFR3A                         | -1.35783   | FBXO9    | -<br>0.00031625<br>7 | CLIC3                     | -0.399105 |
| MAD2L1      | -0.639047  | PHF20L1                       | -0.888553  | BAG2     | -0.12022             | ABCA2                     | -0.832498 |
| ANXA5       | 0.778379   | CHRA1                         | -0.433911  | MIR548U  | -0.0758013           | NPDC1                     | 0.675904  |
| CCNA2       | -1.05716   | LY6K                          | 1.61812    | PTP4A1   | -1.30282             | SAPCD2                    | -0.739747 |
| NUDT6       | -0.572585  | THEM6                         | -0.128344  | OGFRL1   | -0.88925             | DPP7                      | 0.999649  |
| PGRMC2      | -0.959512  | LY6E                          | 0.559459   | MTO1     | -0.204968            | ANAPC2                    | 0.422564  |
| SCLT1       | -0.903534  | TIGD5                         | 0.0620871  | CD109    | -1.50915             | TPRN                      | 1.01107   |
| SLC7A11     | -0.202683  | GRINA                         | 1.13894    | SENP6    | -1.12414             | TMEM203                   | 0.489662  |
| NDUFC1      | 0.0631234  | EXOSC4                        | 1.16083    | TTK      | -1.28911             |                           |           |
| SETD7       | -1.01142   | GPAA1                         | 0.188166   | BCKDHB   | -1.01759             |                           |           |
| RNF150      | -2.55253   | CYC1                          | 0.489088   | TPBG     | 1.04212              |                           |           |
| SMARCA5-AS1 | -1.63185   | MAF1                          | 0.637442   | CYB5R4   | -0.488685            |                           |           |
| SH3D19      | -0.916783  | HSF1                          | 0.1936     | NT5E     | 0.752636             |                           |           |
| PET112      | 0.0957679  | SLC52A2                       | 1.02909    | SLC35A1  | -0.30145             |                           |           |
| PLRG1       | 0.256819   | PPP1R16A                      | 0.379561   | ORC3     | -0.708138            |                           |           |
| C4orf46     | -0.573858  | MFSD3                         | -0.30134   | PNRC1    | -0.127971            |                           |           |
| PPID        | 0.420661   | C8orf33                       | 0.365366   | AMD1     | -1.07354             |                           |           |
| NAF1        | -0.201086  | MFHAS1                        | 0.00818204 | GTF3C6   | 0.183968             |                           |           |
| C4orf27     | -0.077449  | PINX1                         | 0.86024    | RPF2     | 0.469708             |                           |           |
| HMGB2       | -0.363759  | CTSB                          | 0.535301   | MARCKS   | -1.4453              |                           |           |
| DCTD        | 0.60729    | CNOT7                         | -0.623793  | NT5DC1   | -0.53095             |                           |           |
